# Supplementary material
Source: publisher figshare collection journal article supplement (https://gsajournals.figshare.com/articles/dataset/_/7166141)

# RNA editing sites in atp1 ALH07287.1

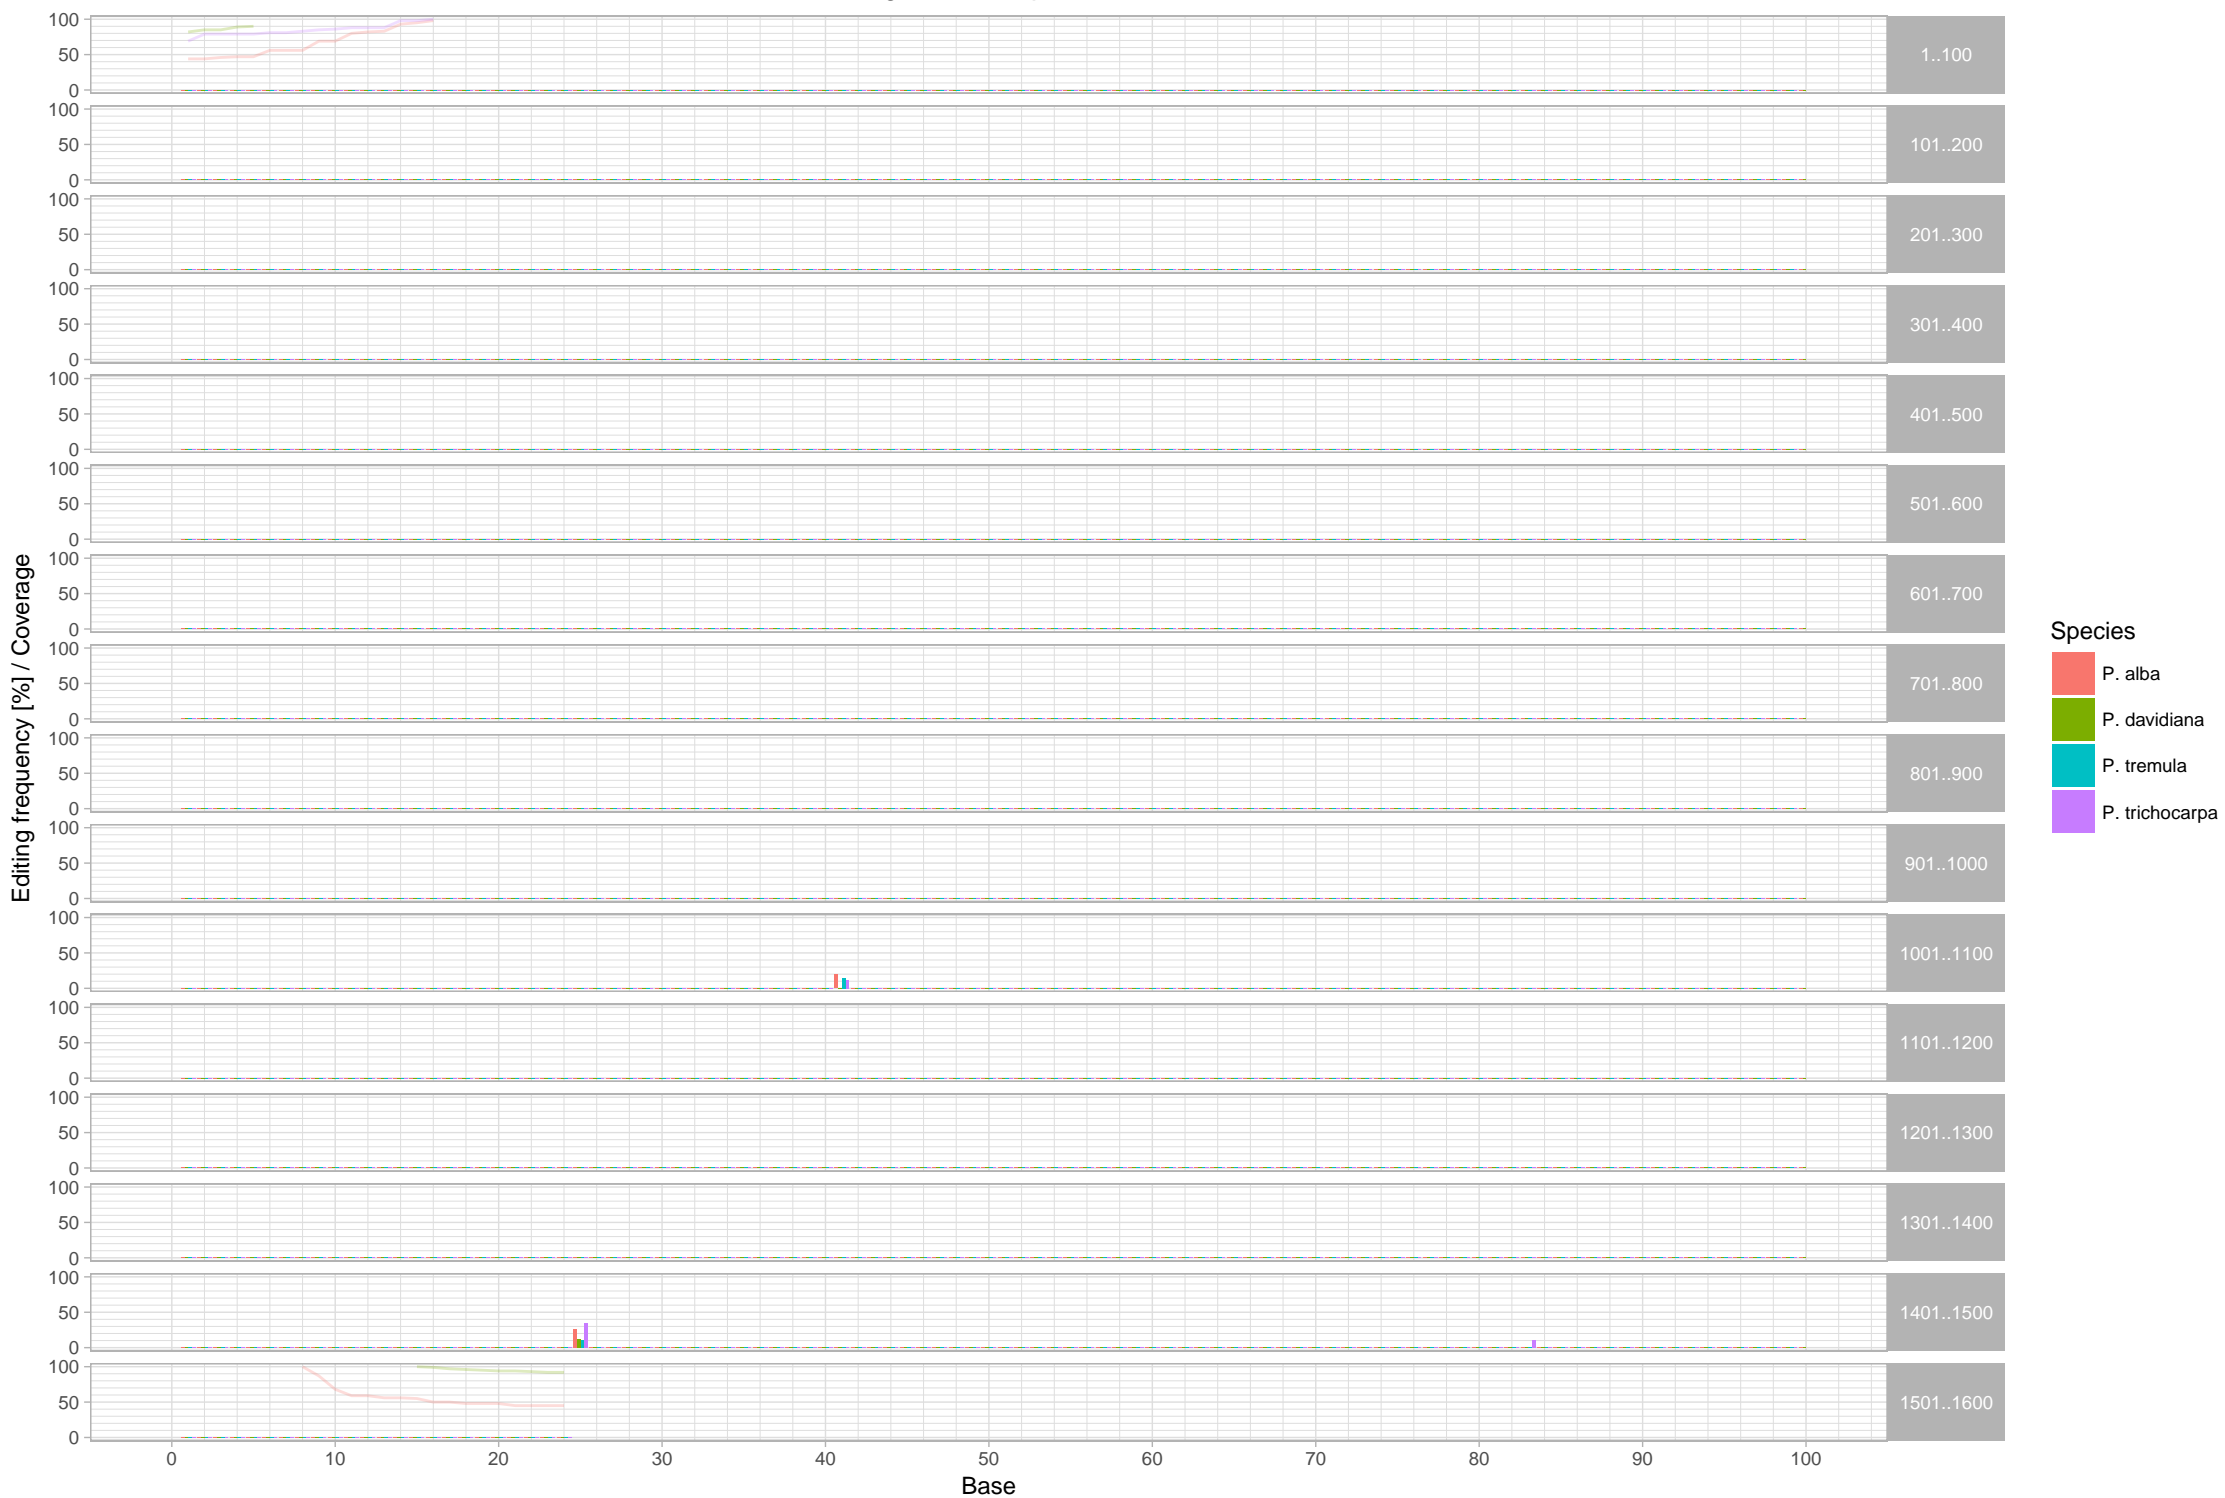

# RNA editing sites in atp4 ALH07288.1

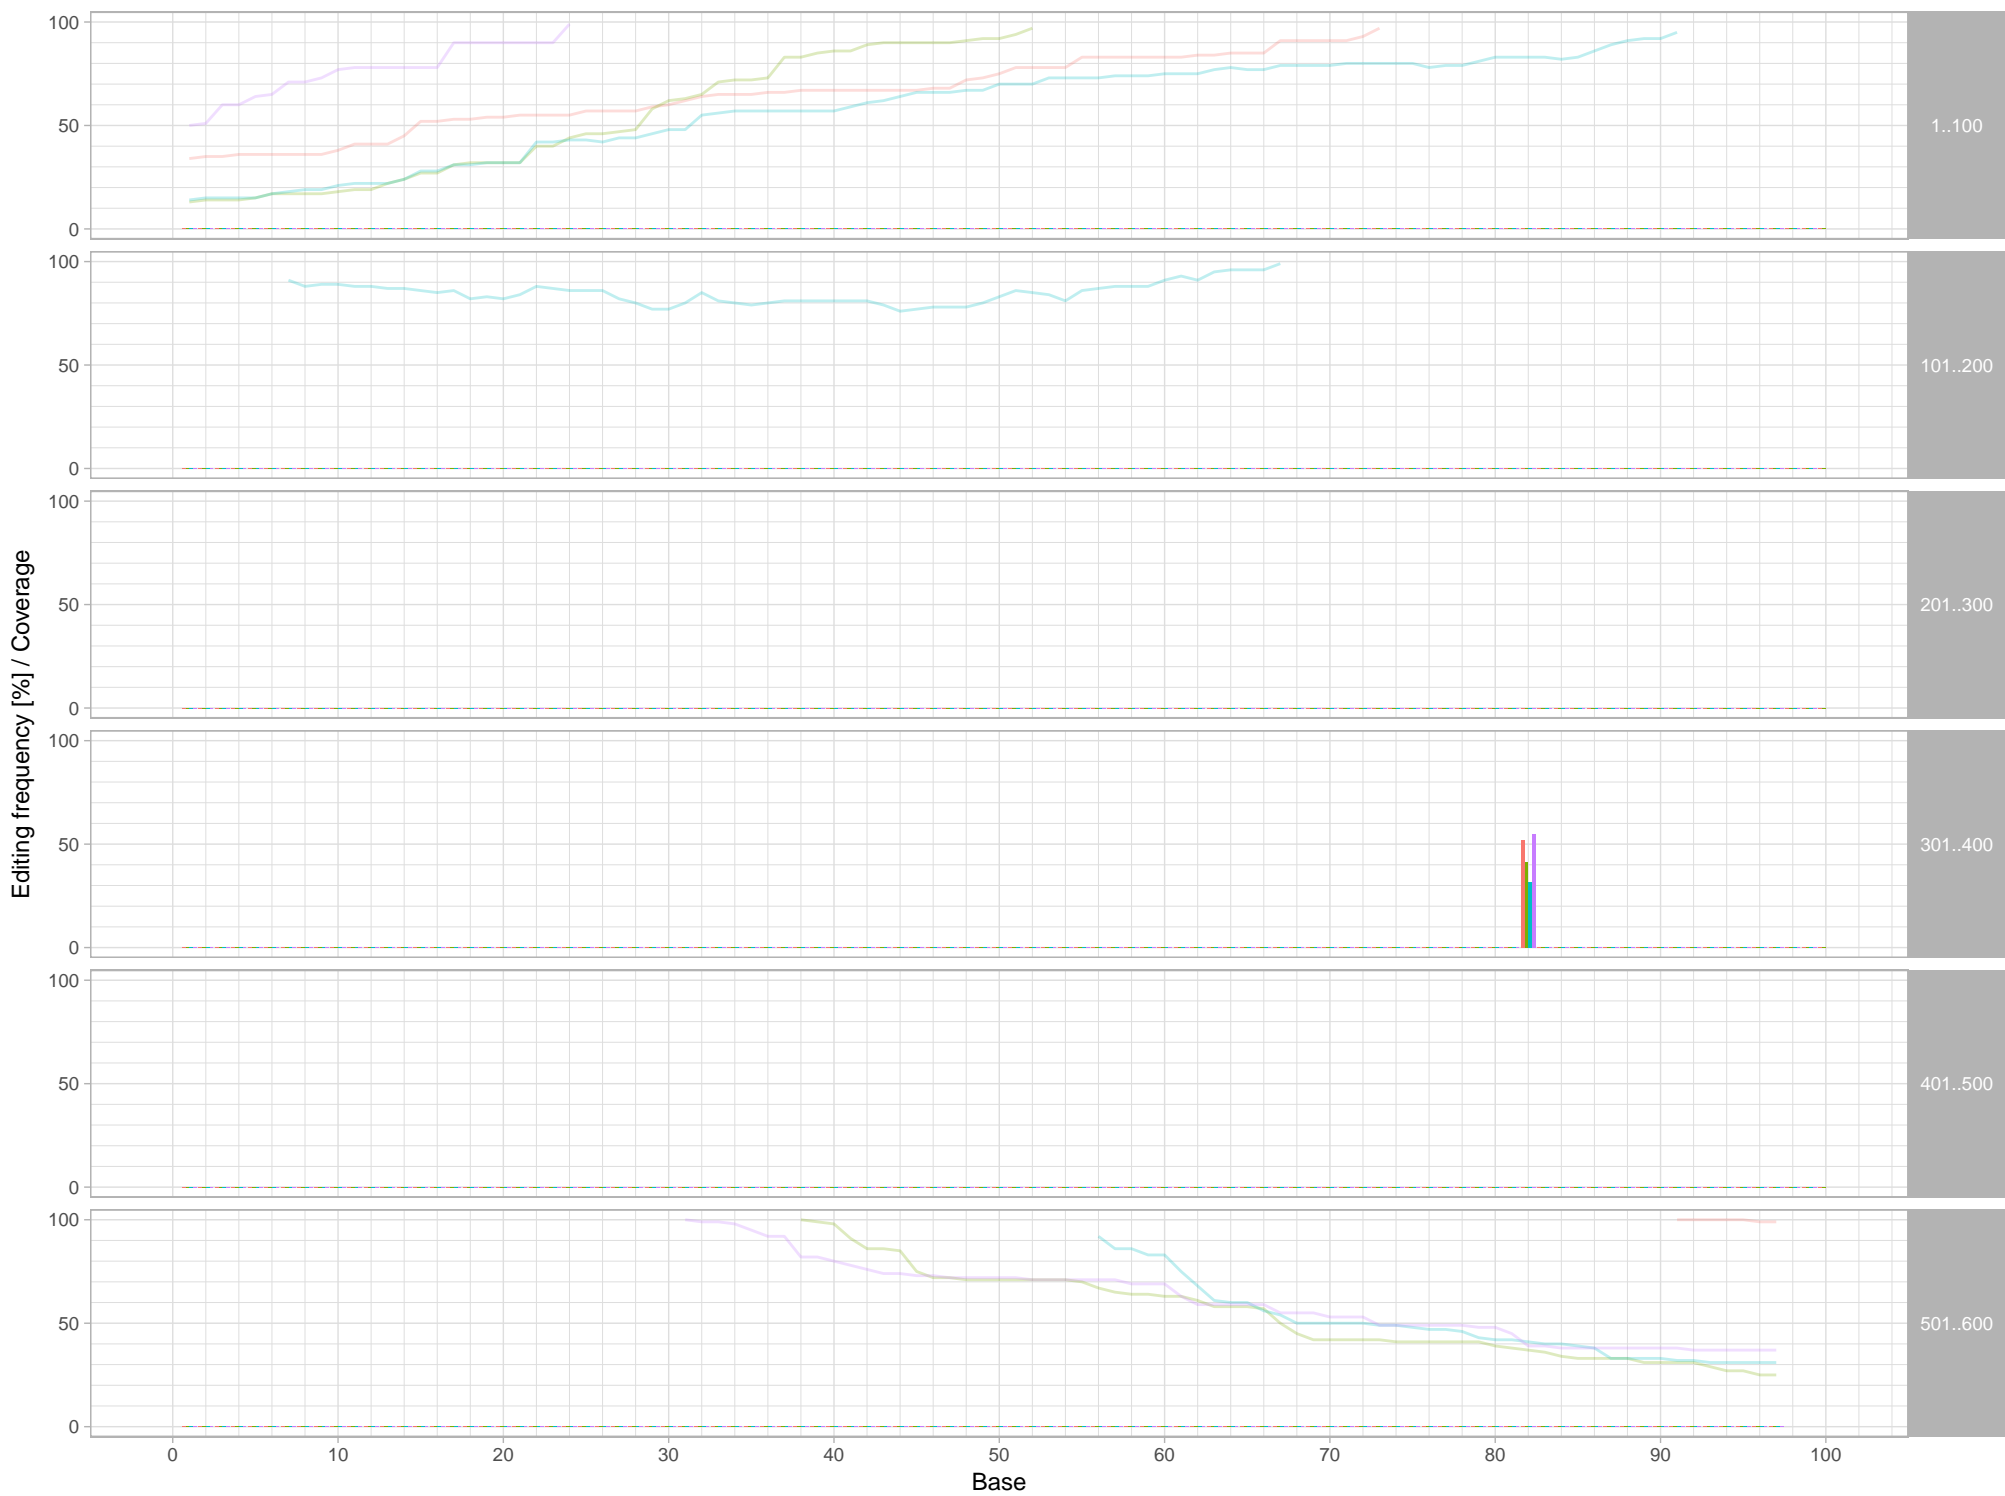

# RNA editing sites in atp6 ALH07289.1

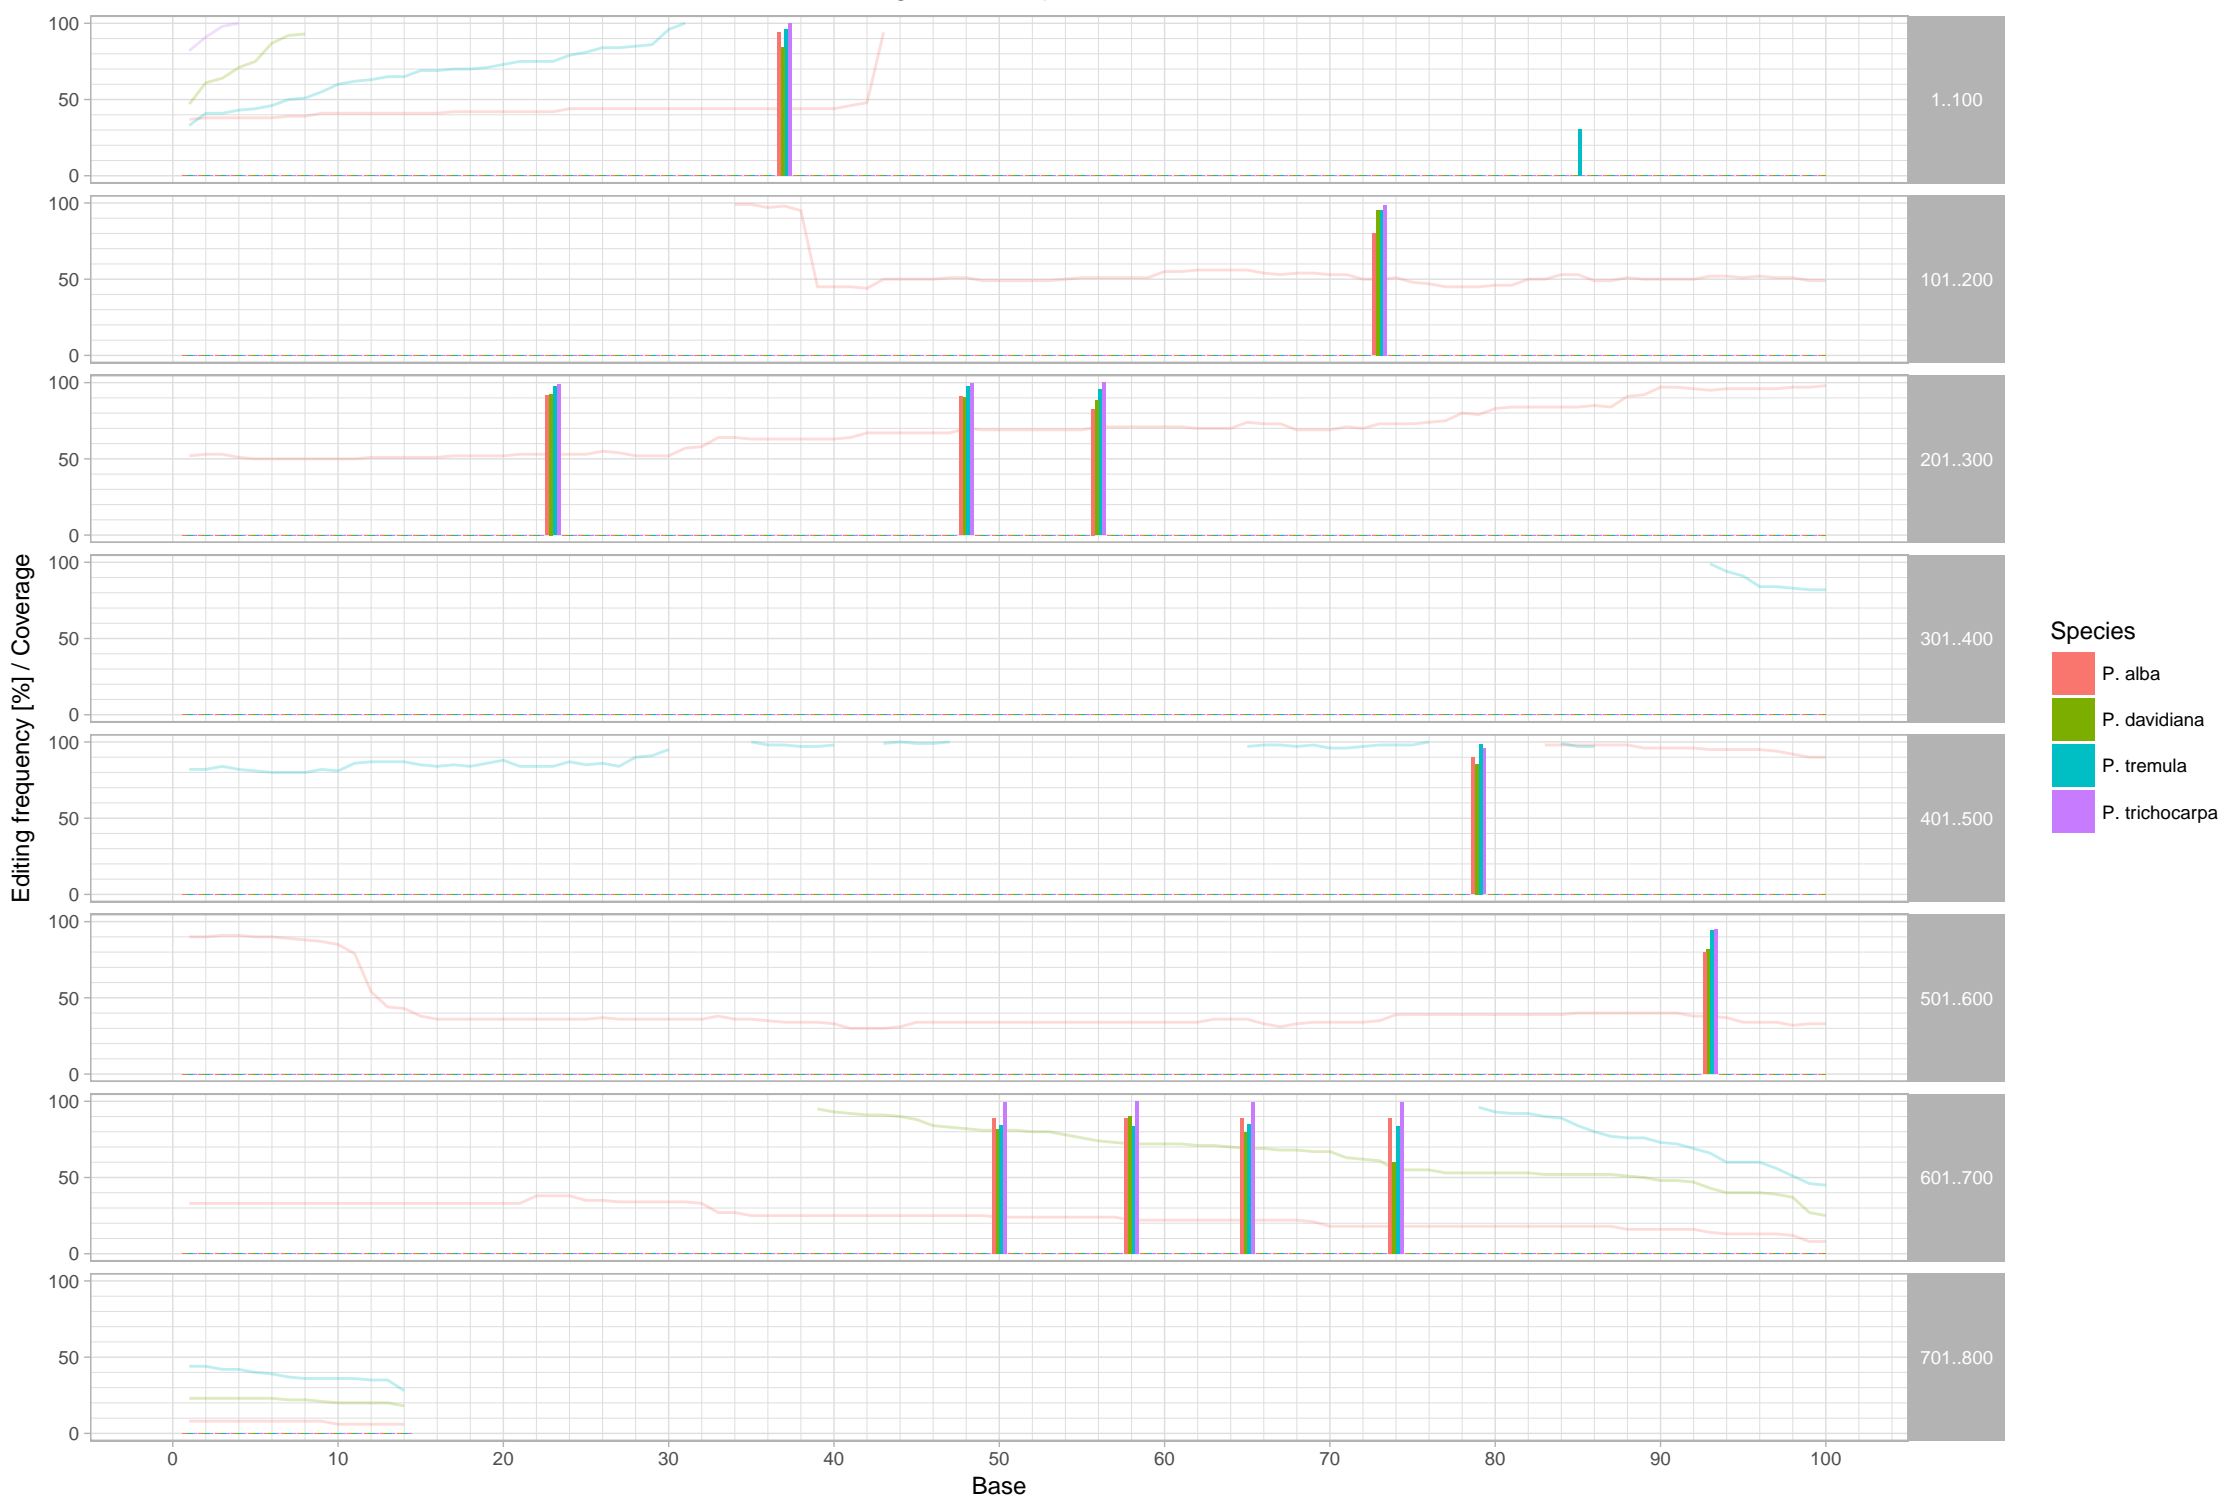

# RNA editing sites in atp8 ALH07290.1

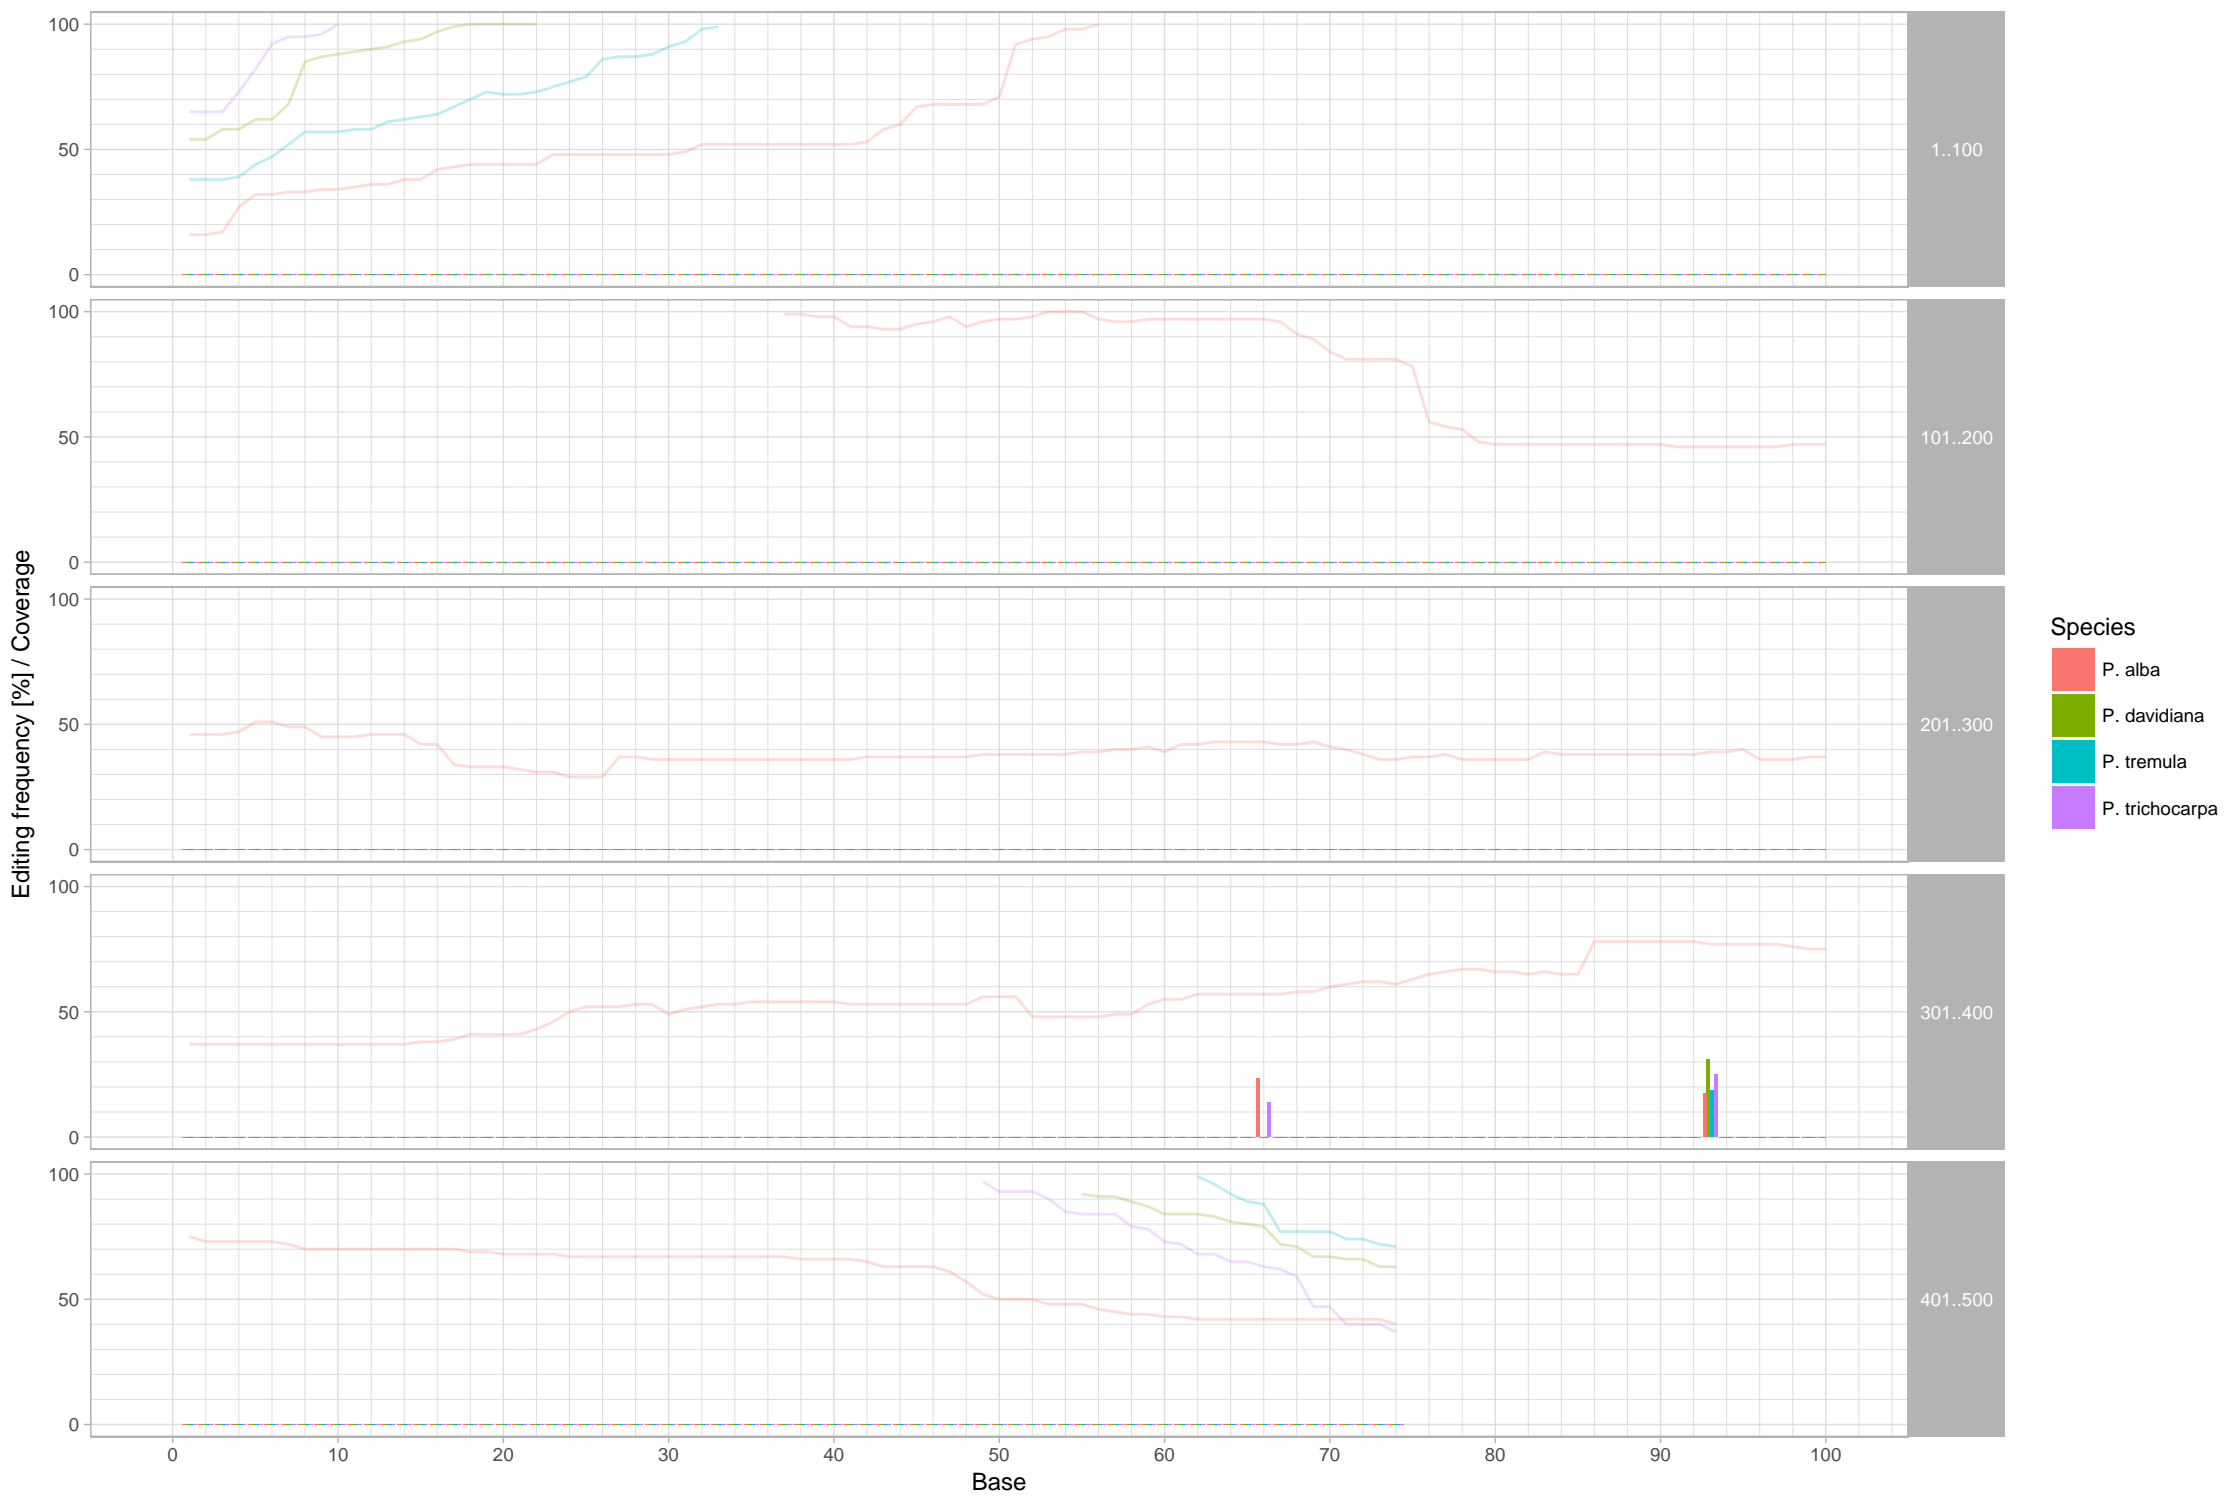

# RNA editing sites in ccmB ALH07292.1

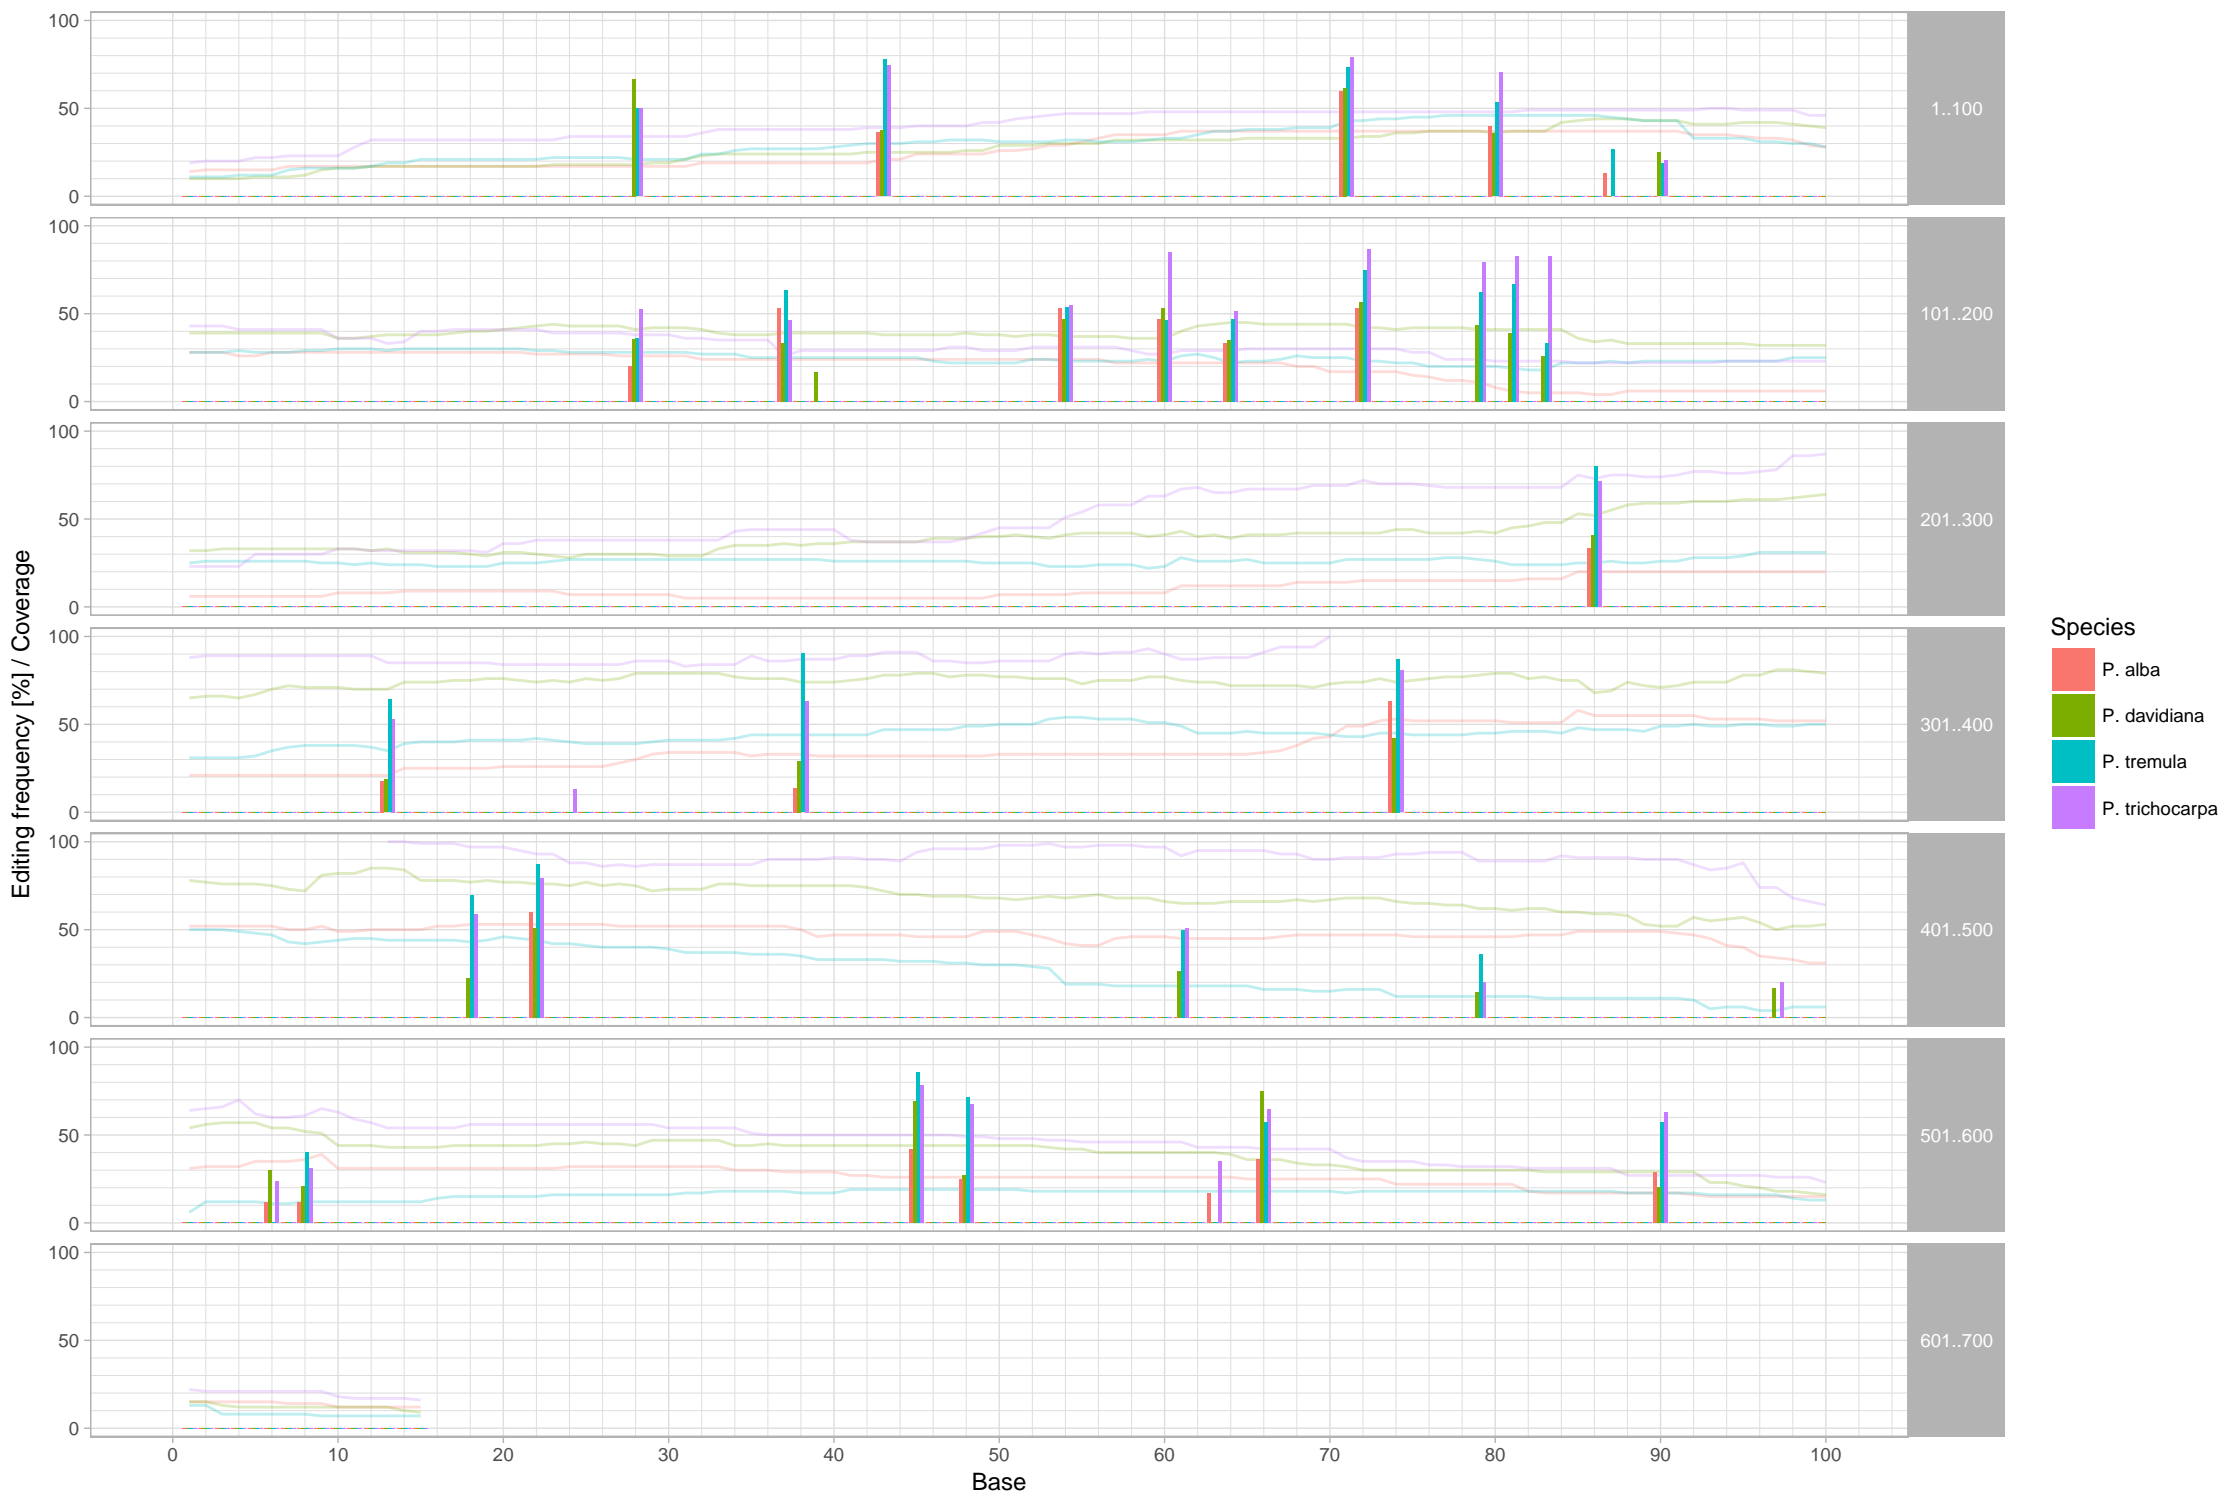

# RNA editing sites in ccmC ALH07293.1

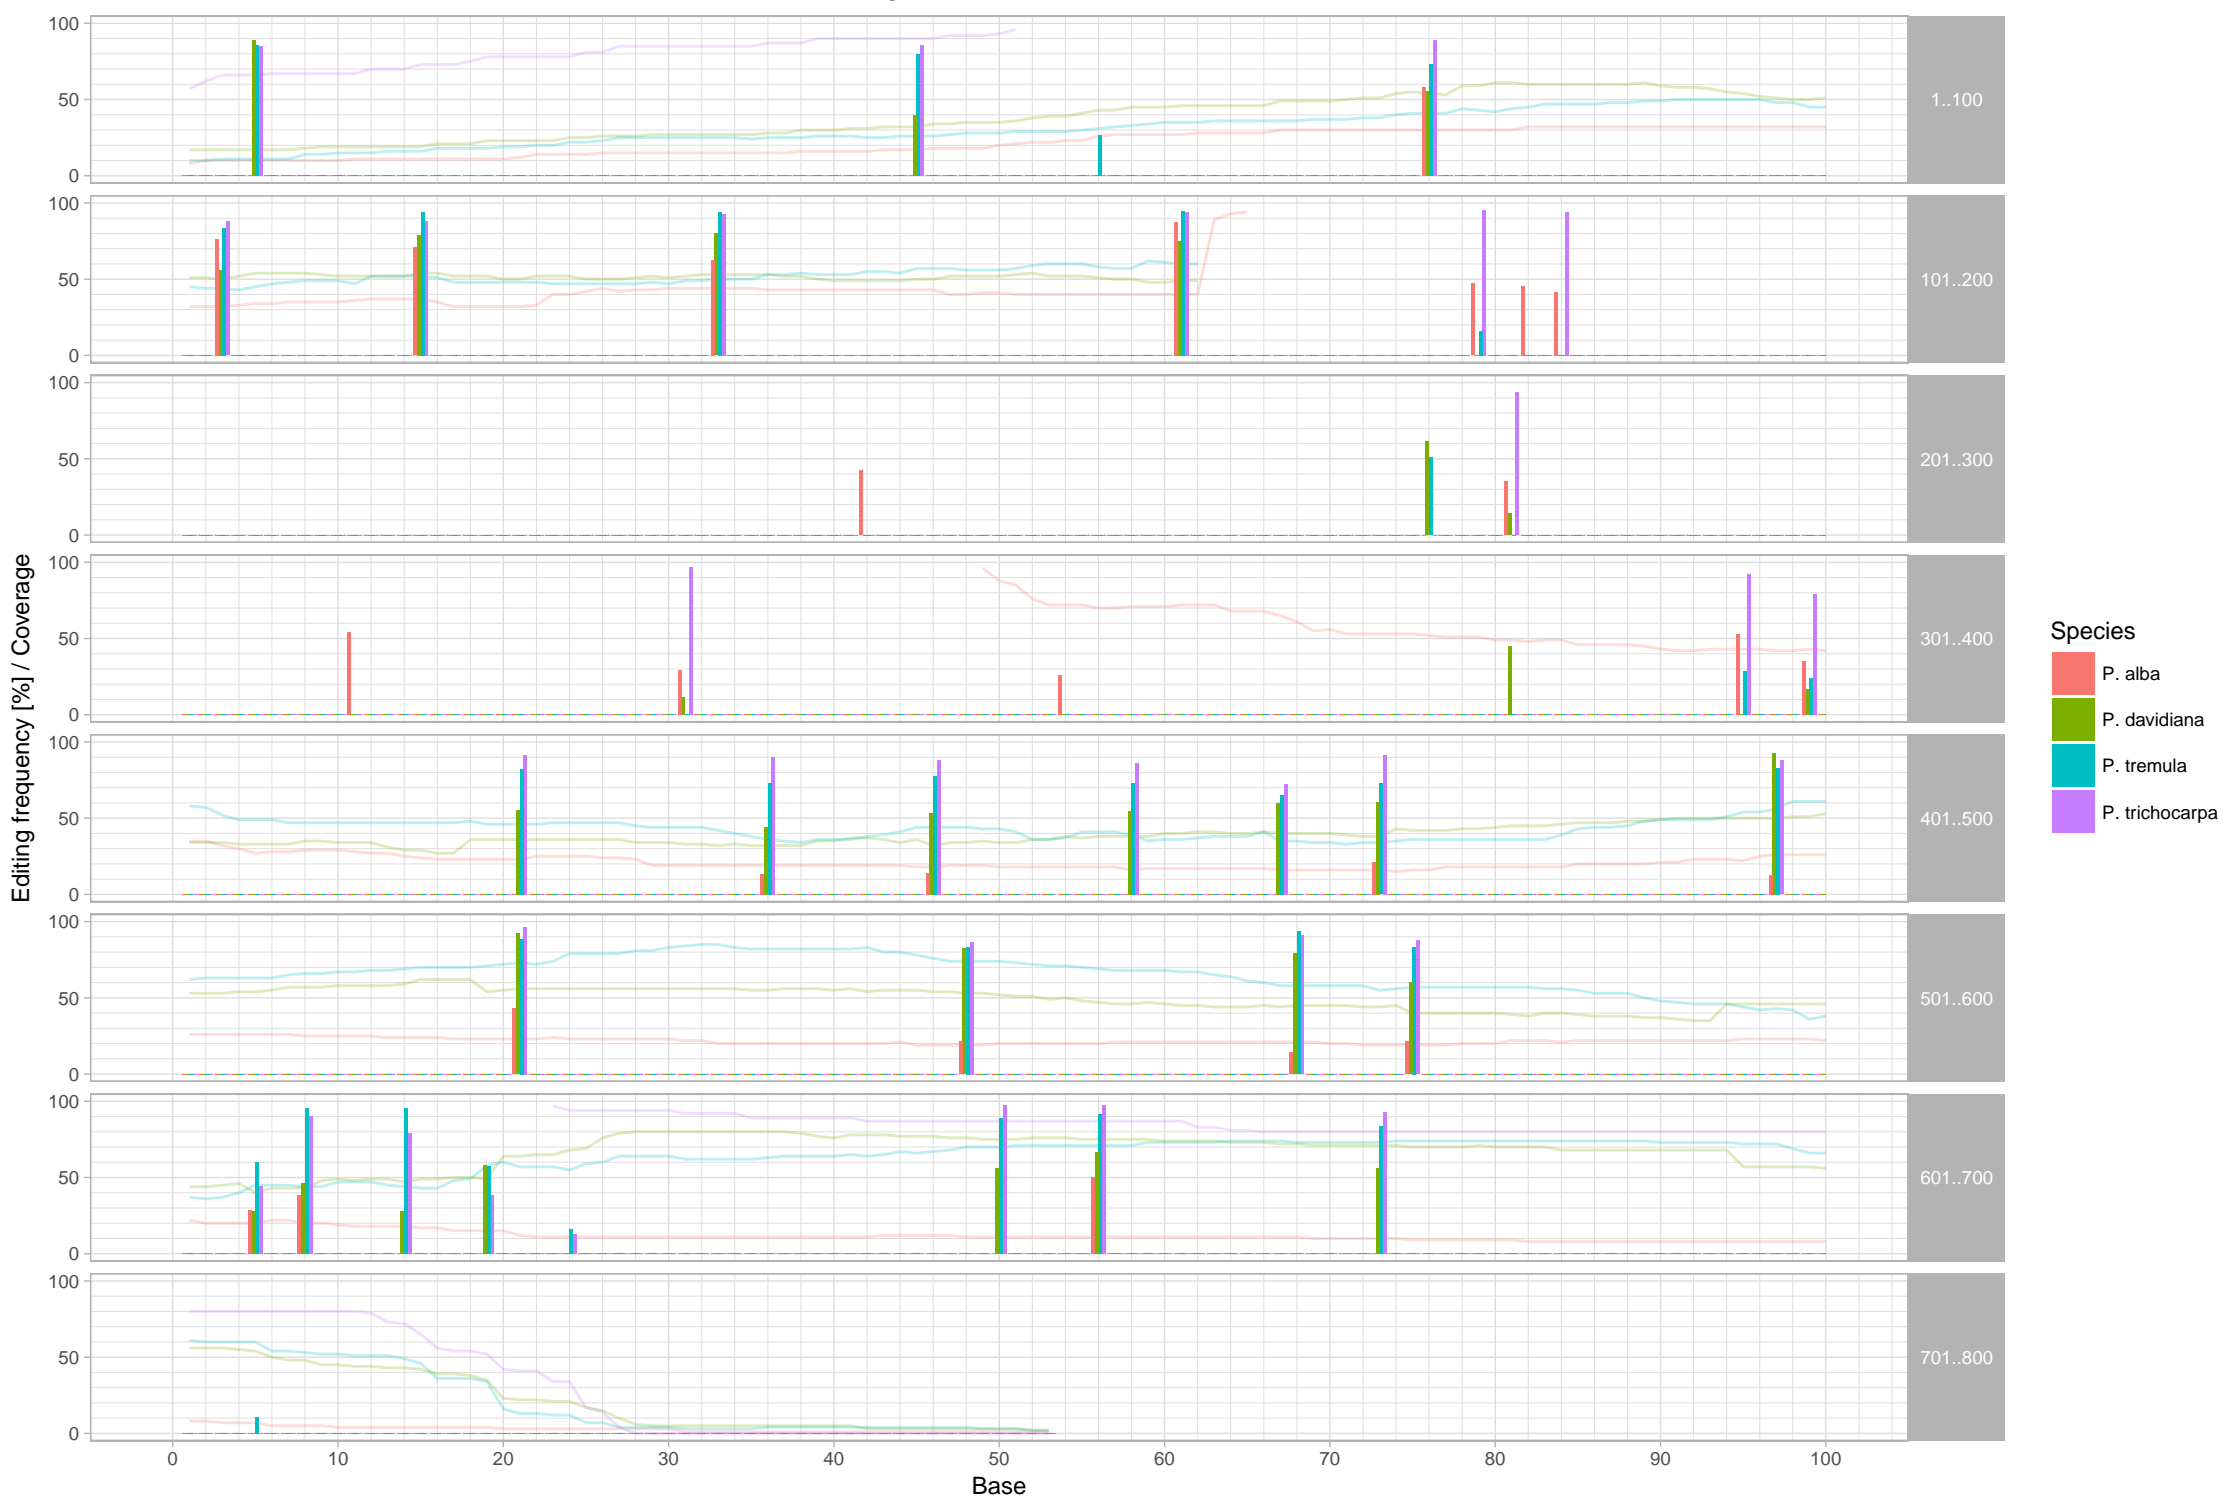

# RNA editing sites in ccmFc ALH07294.1

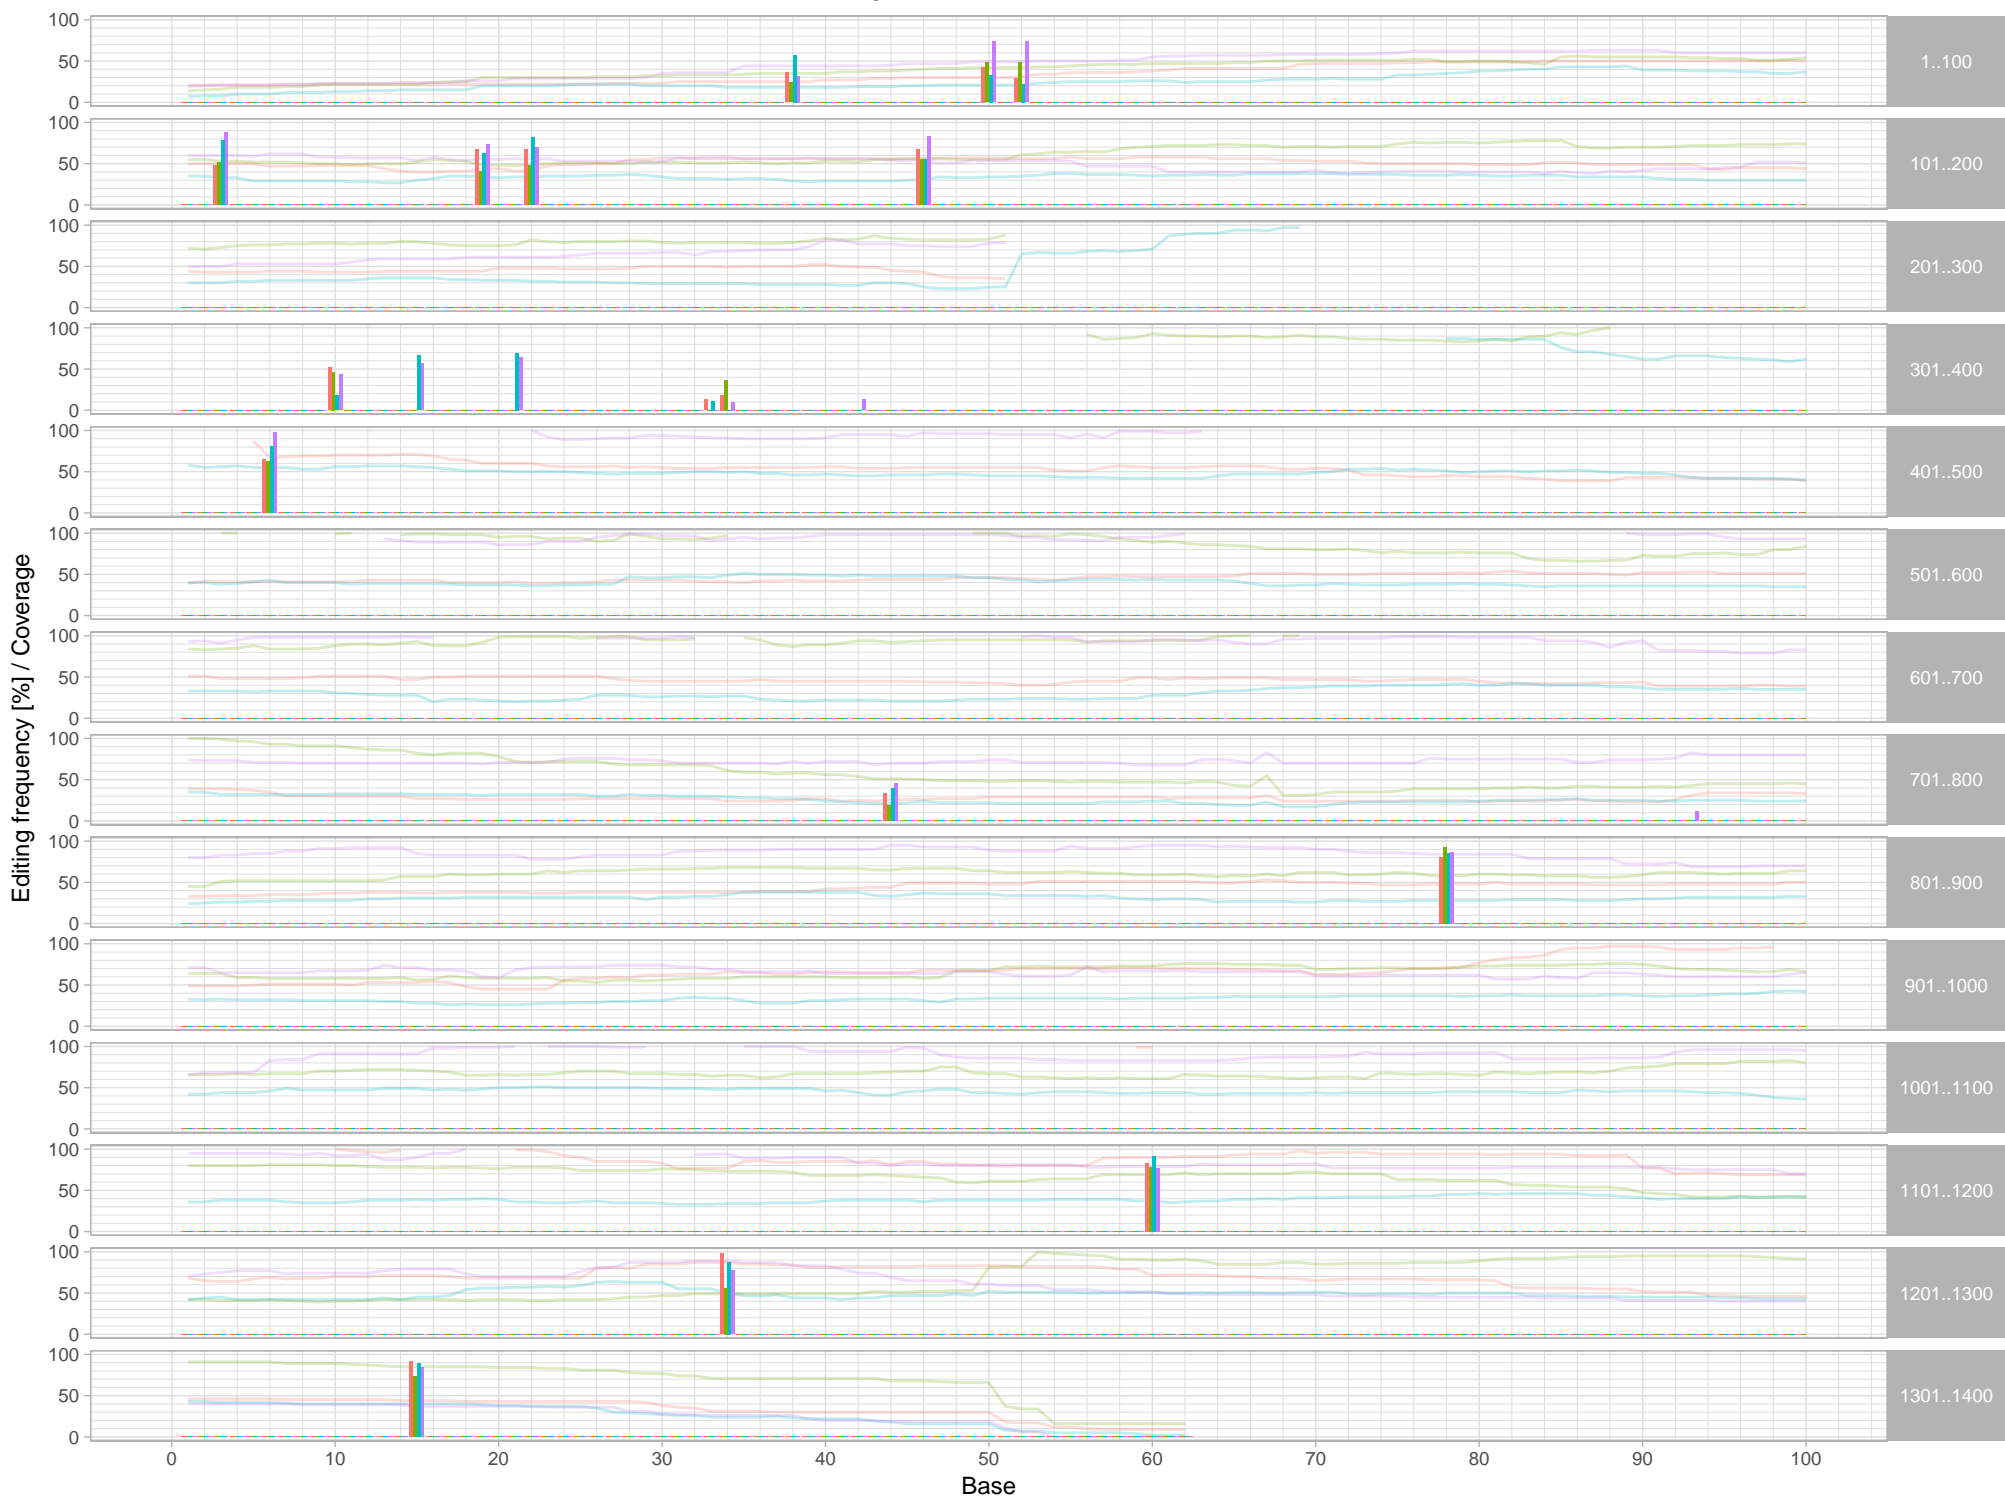

# RNA editing sites in ccmFn ALH07295.1

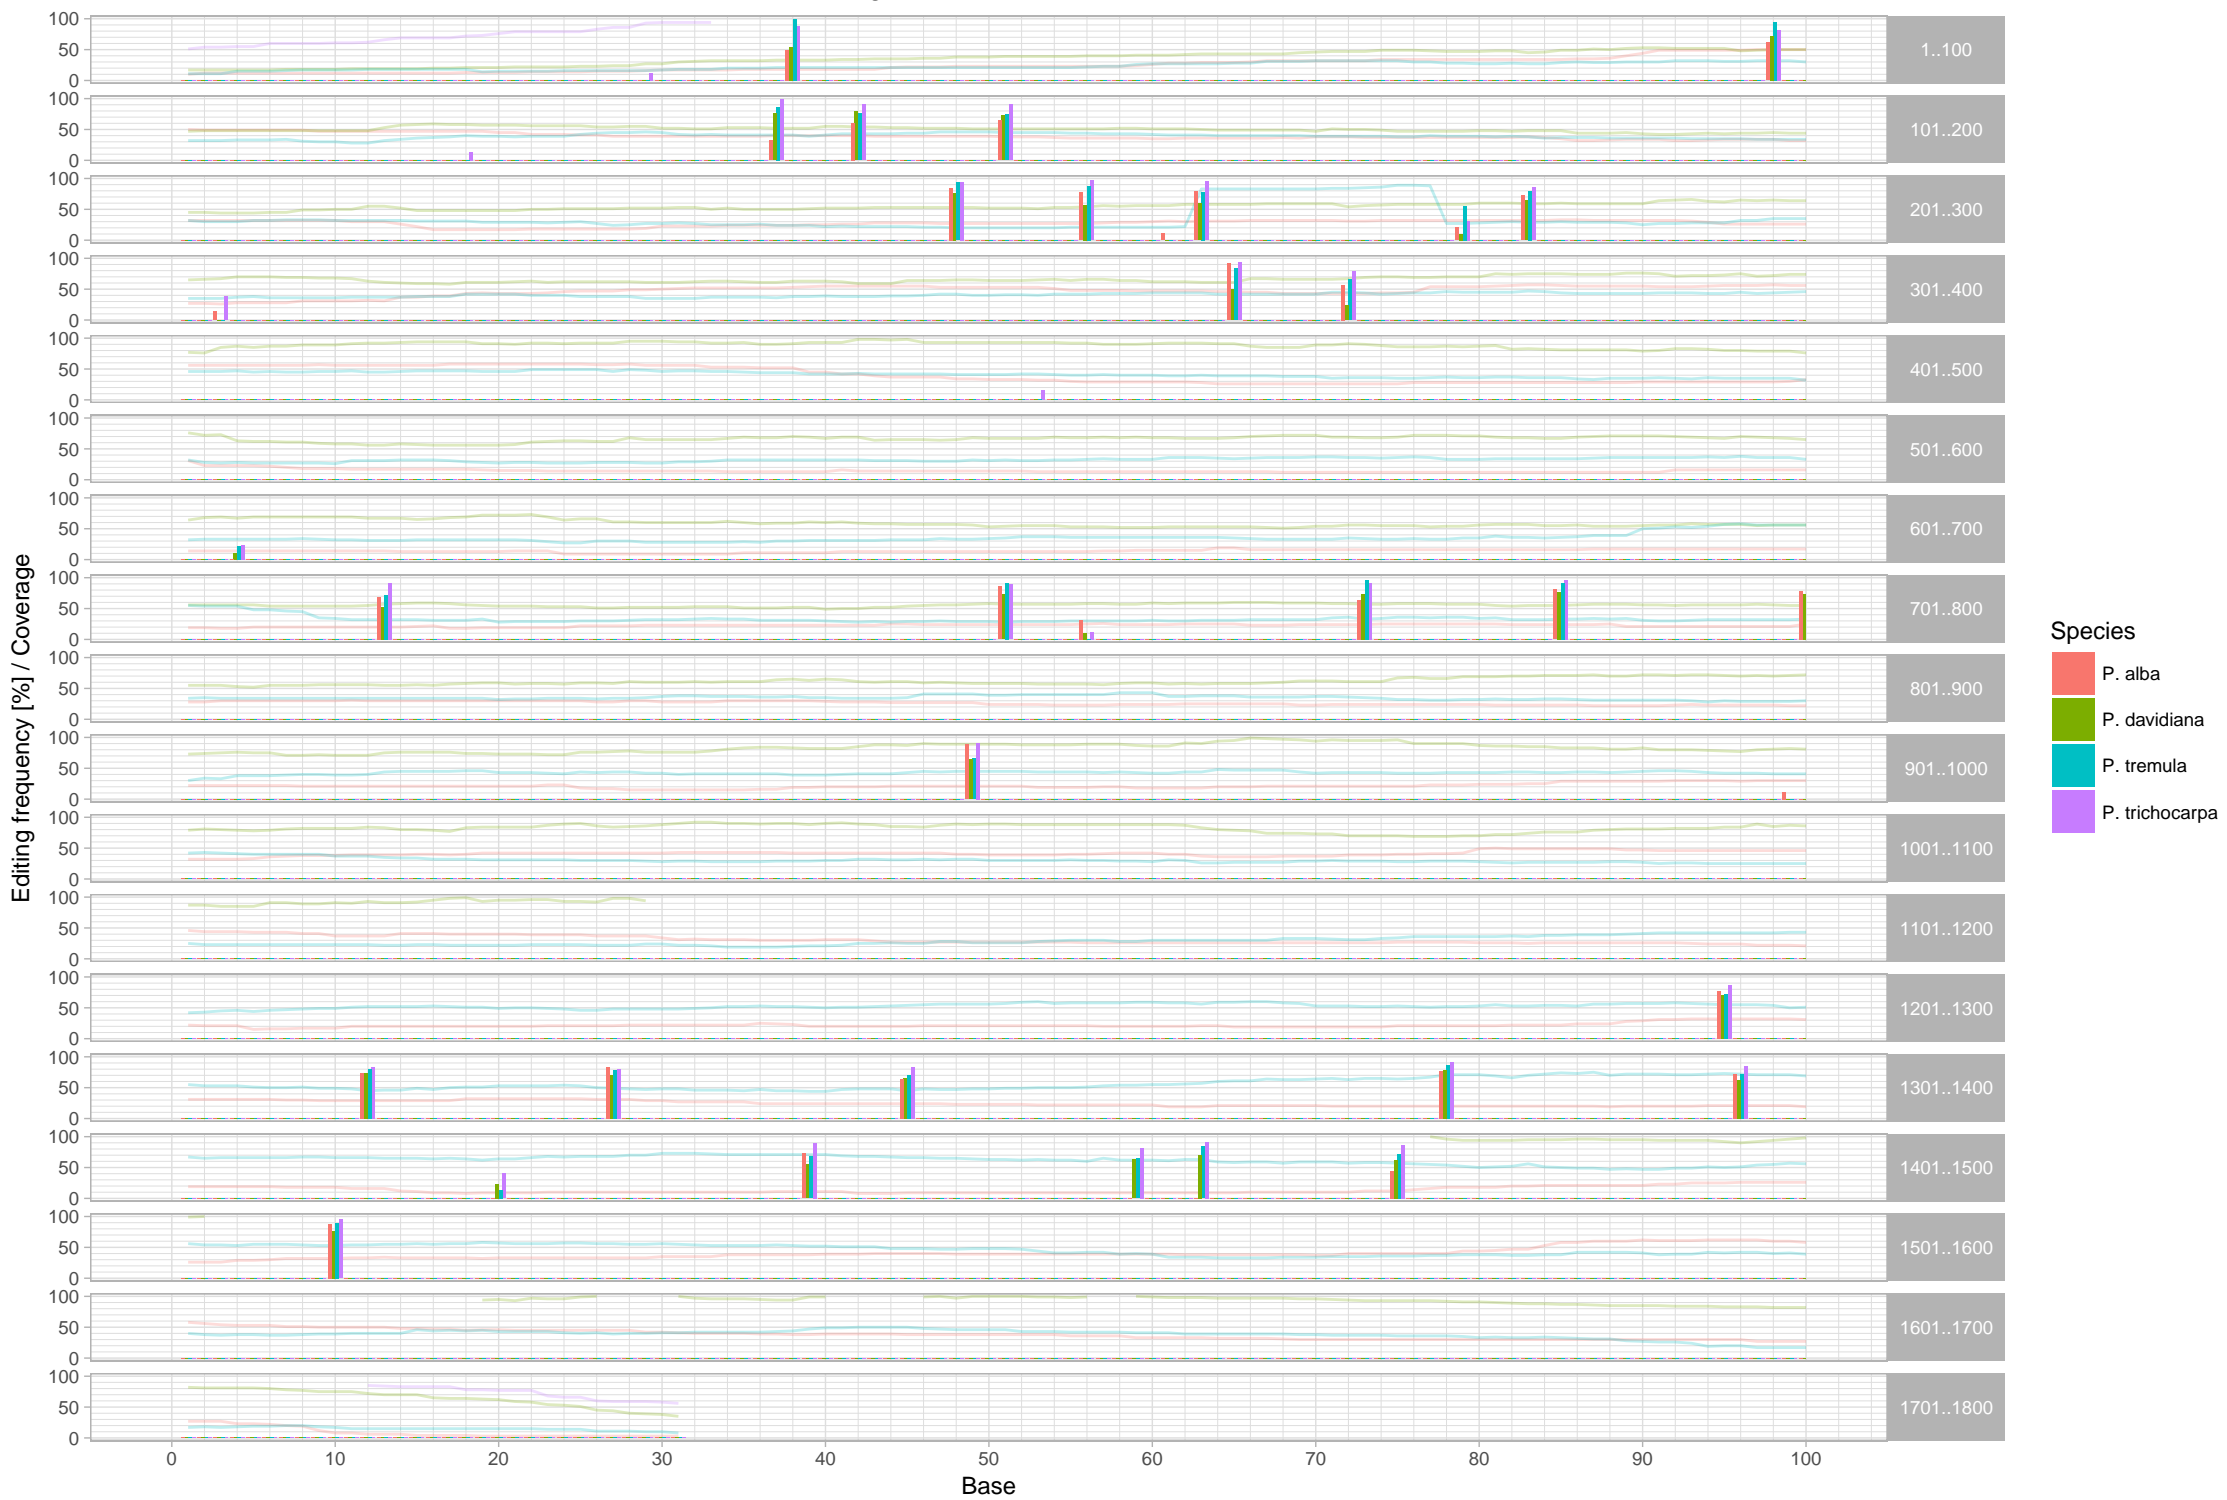



# RNA editing sites in cob ALH07296.1

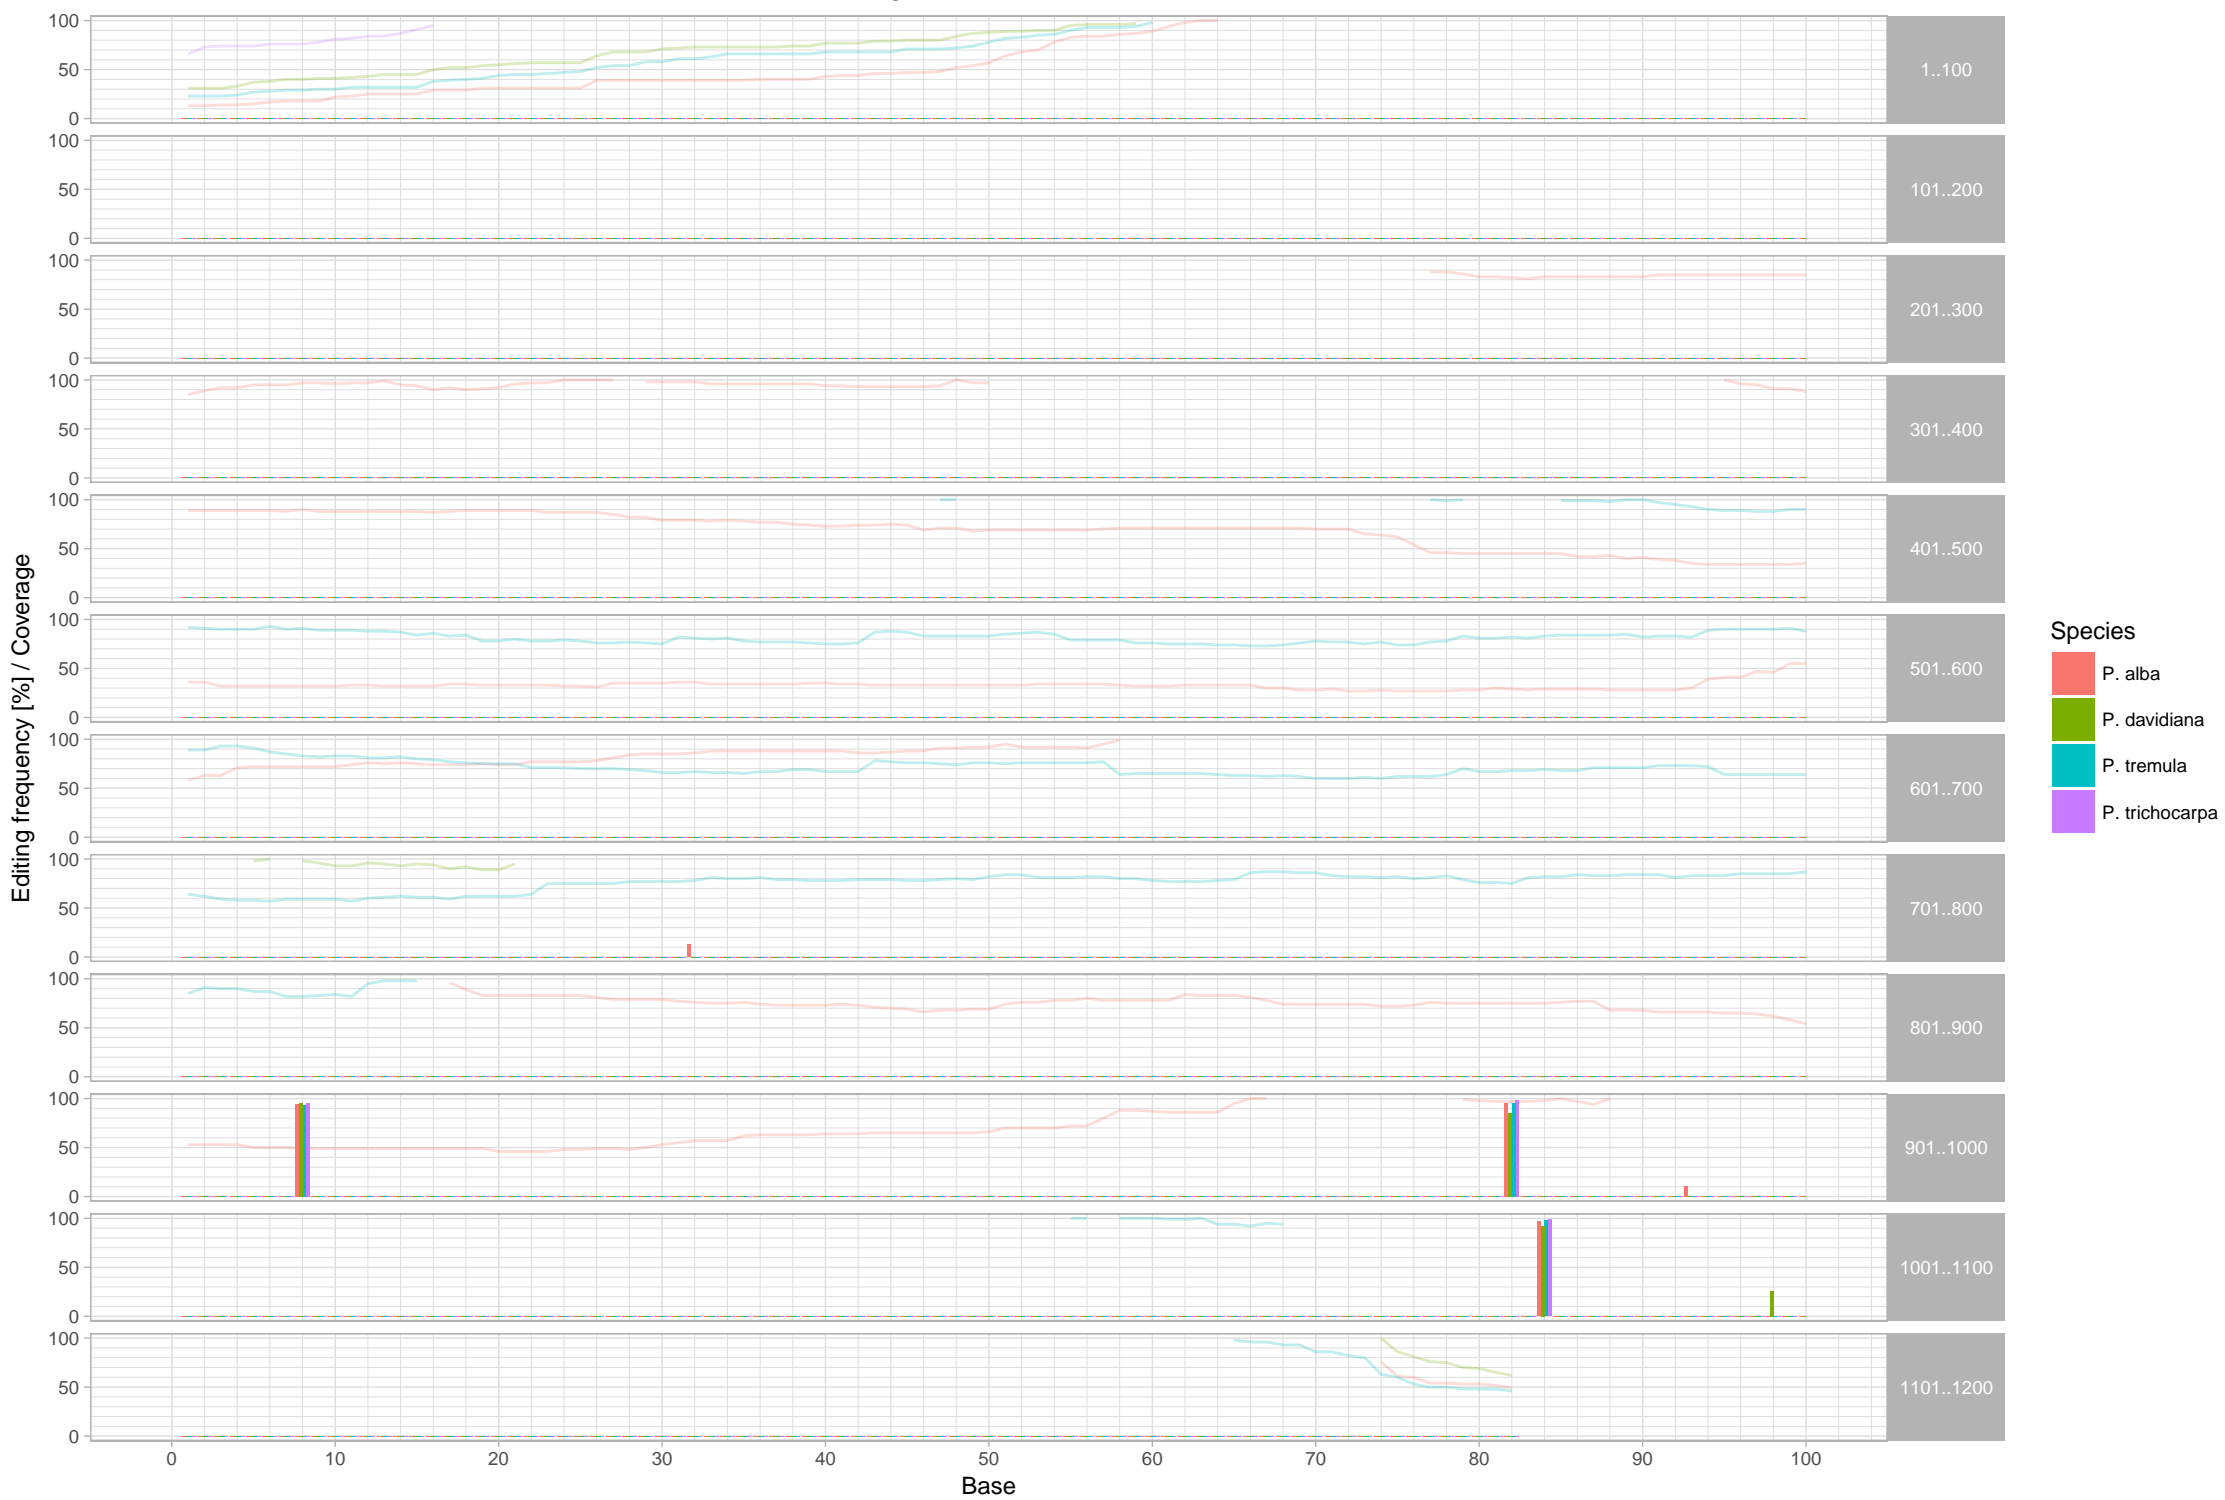

# RNA editing sites in cox1 ALH07297.1

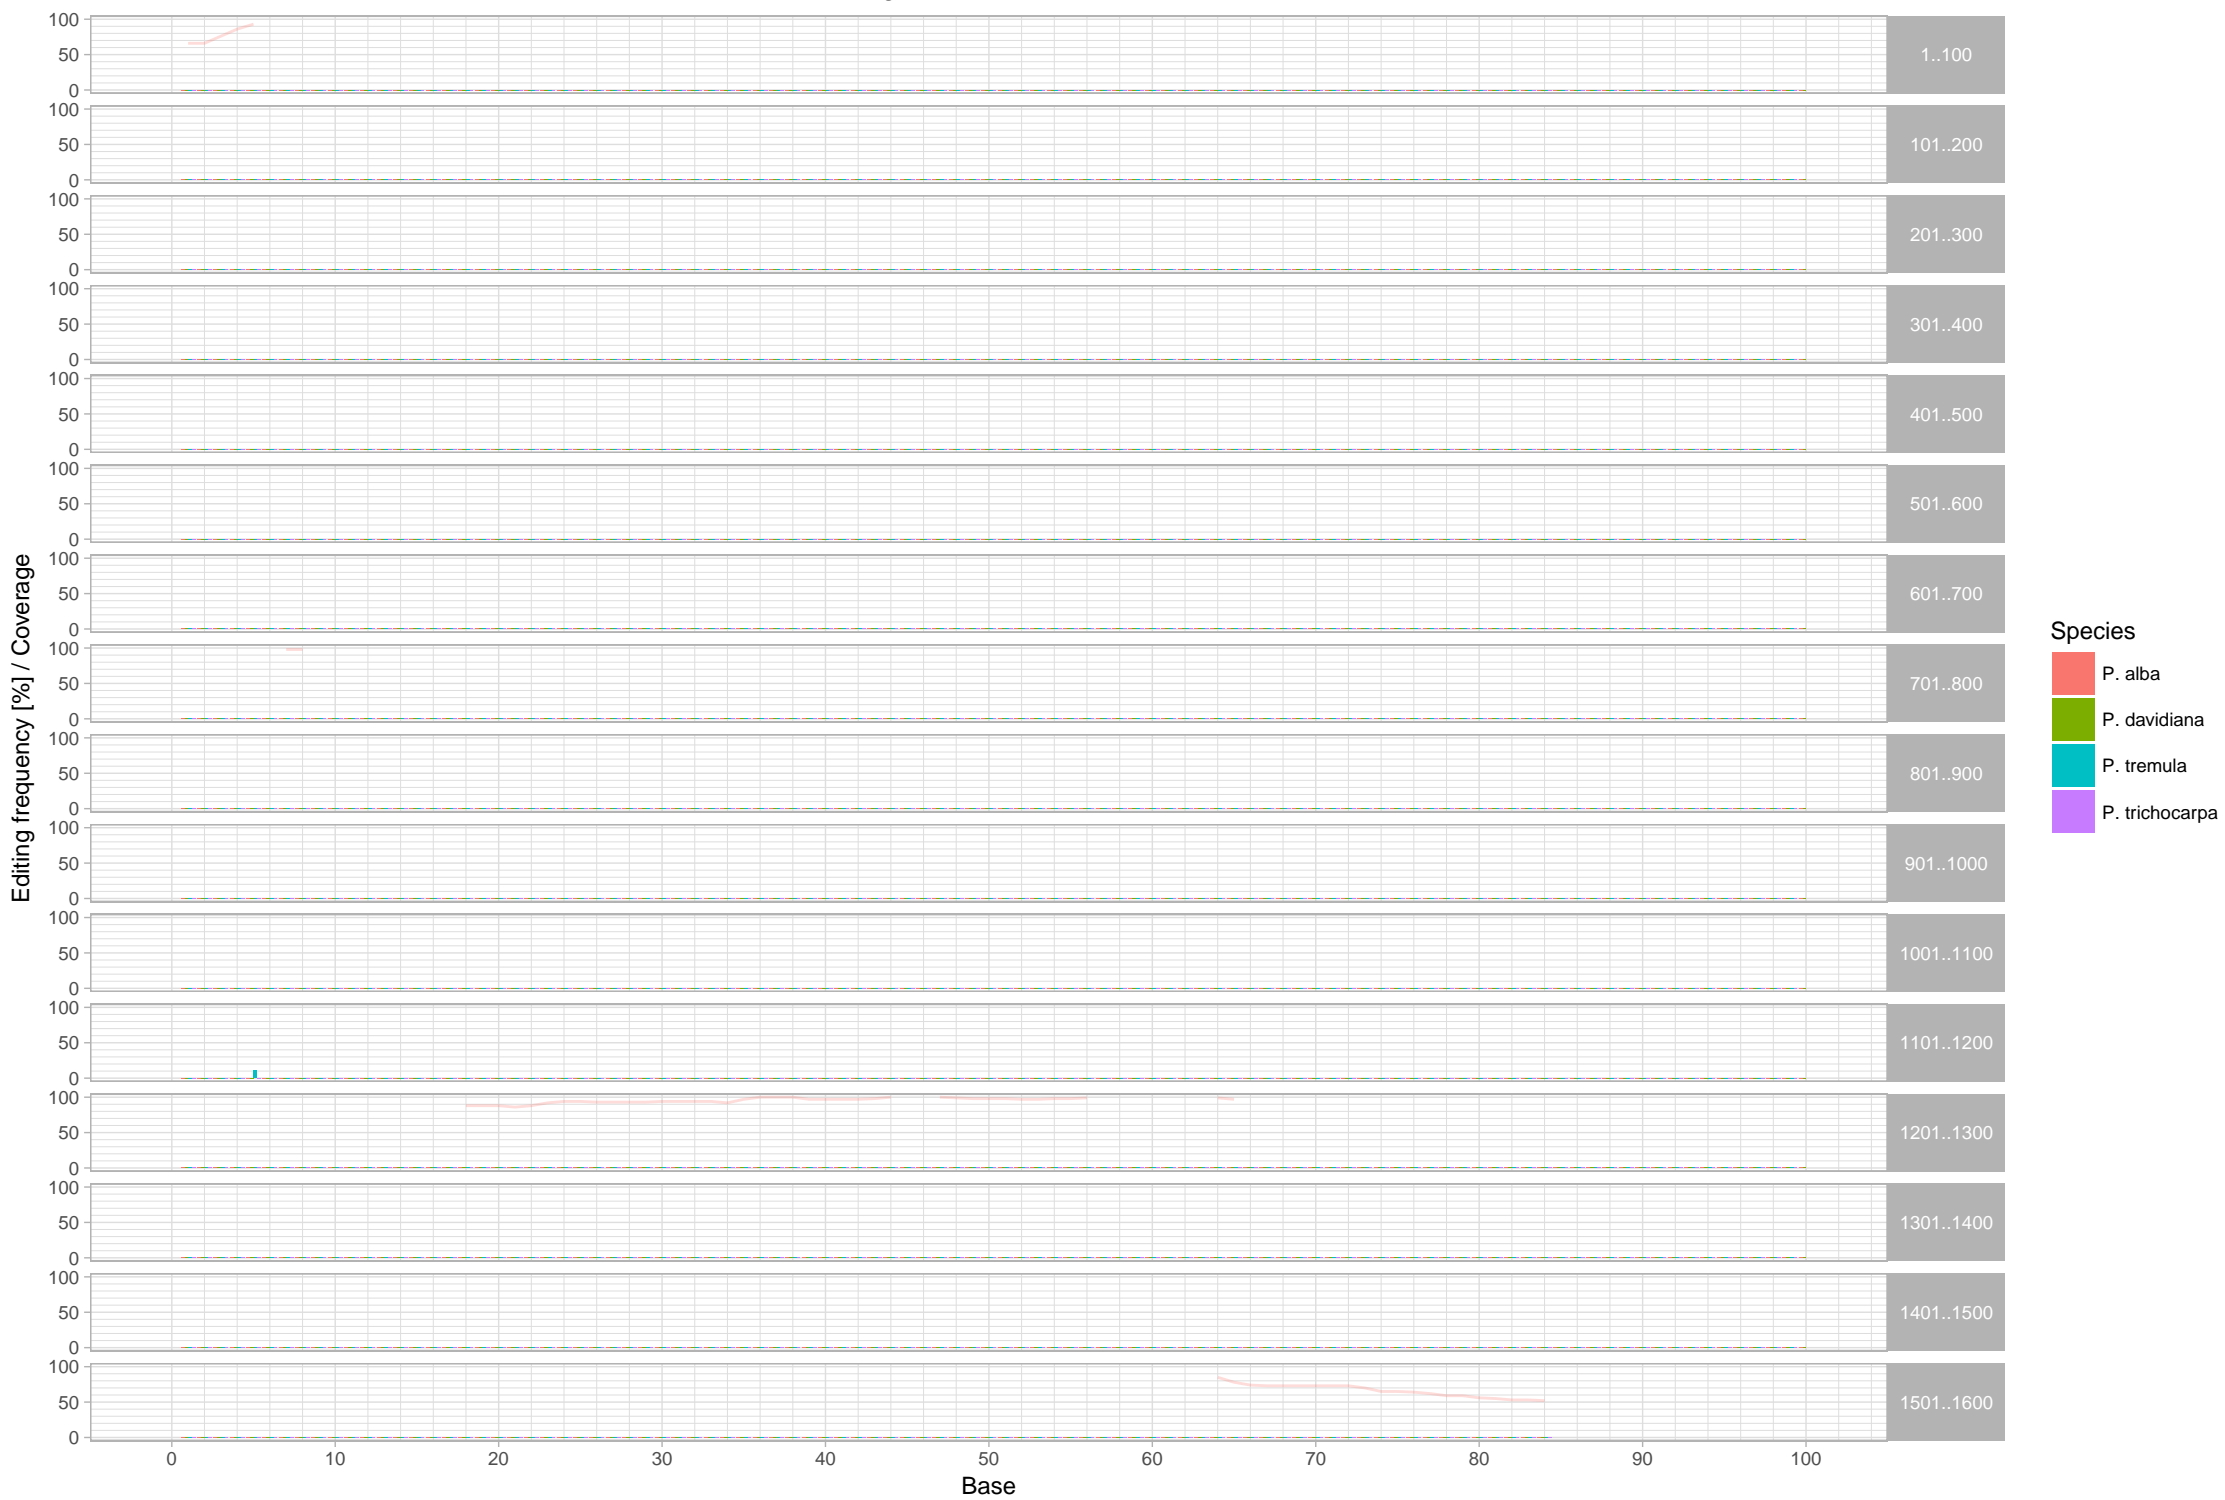

# RNA editing sites in matR ALH07300.1

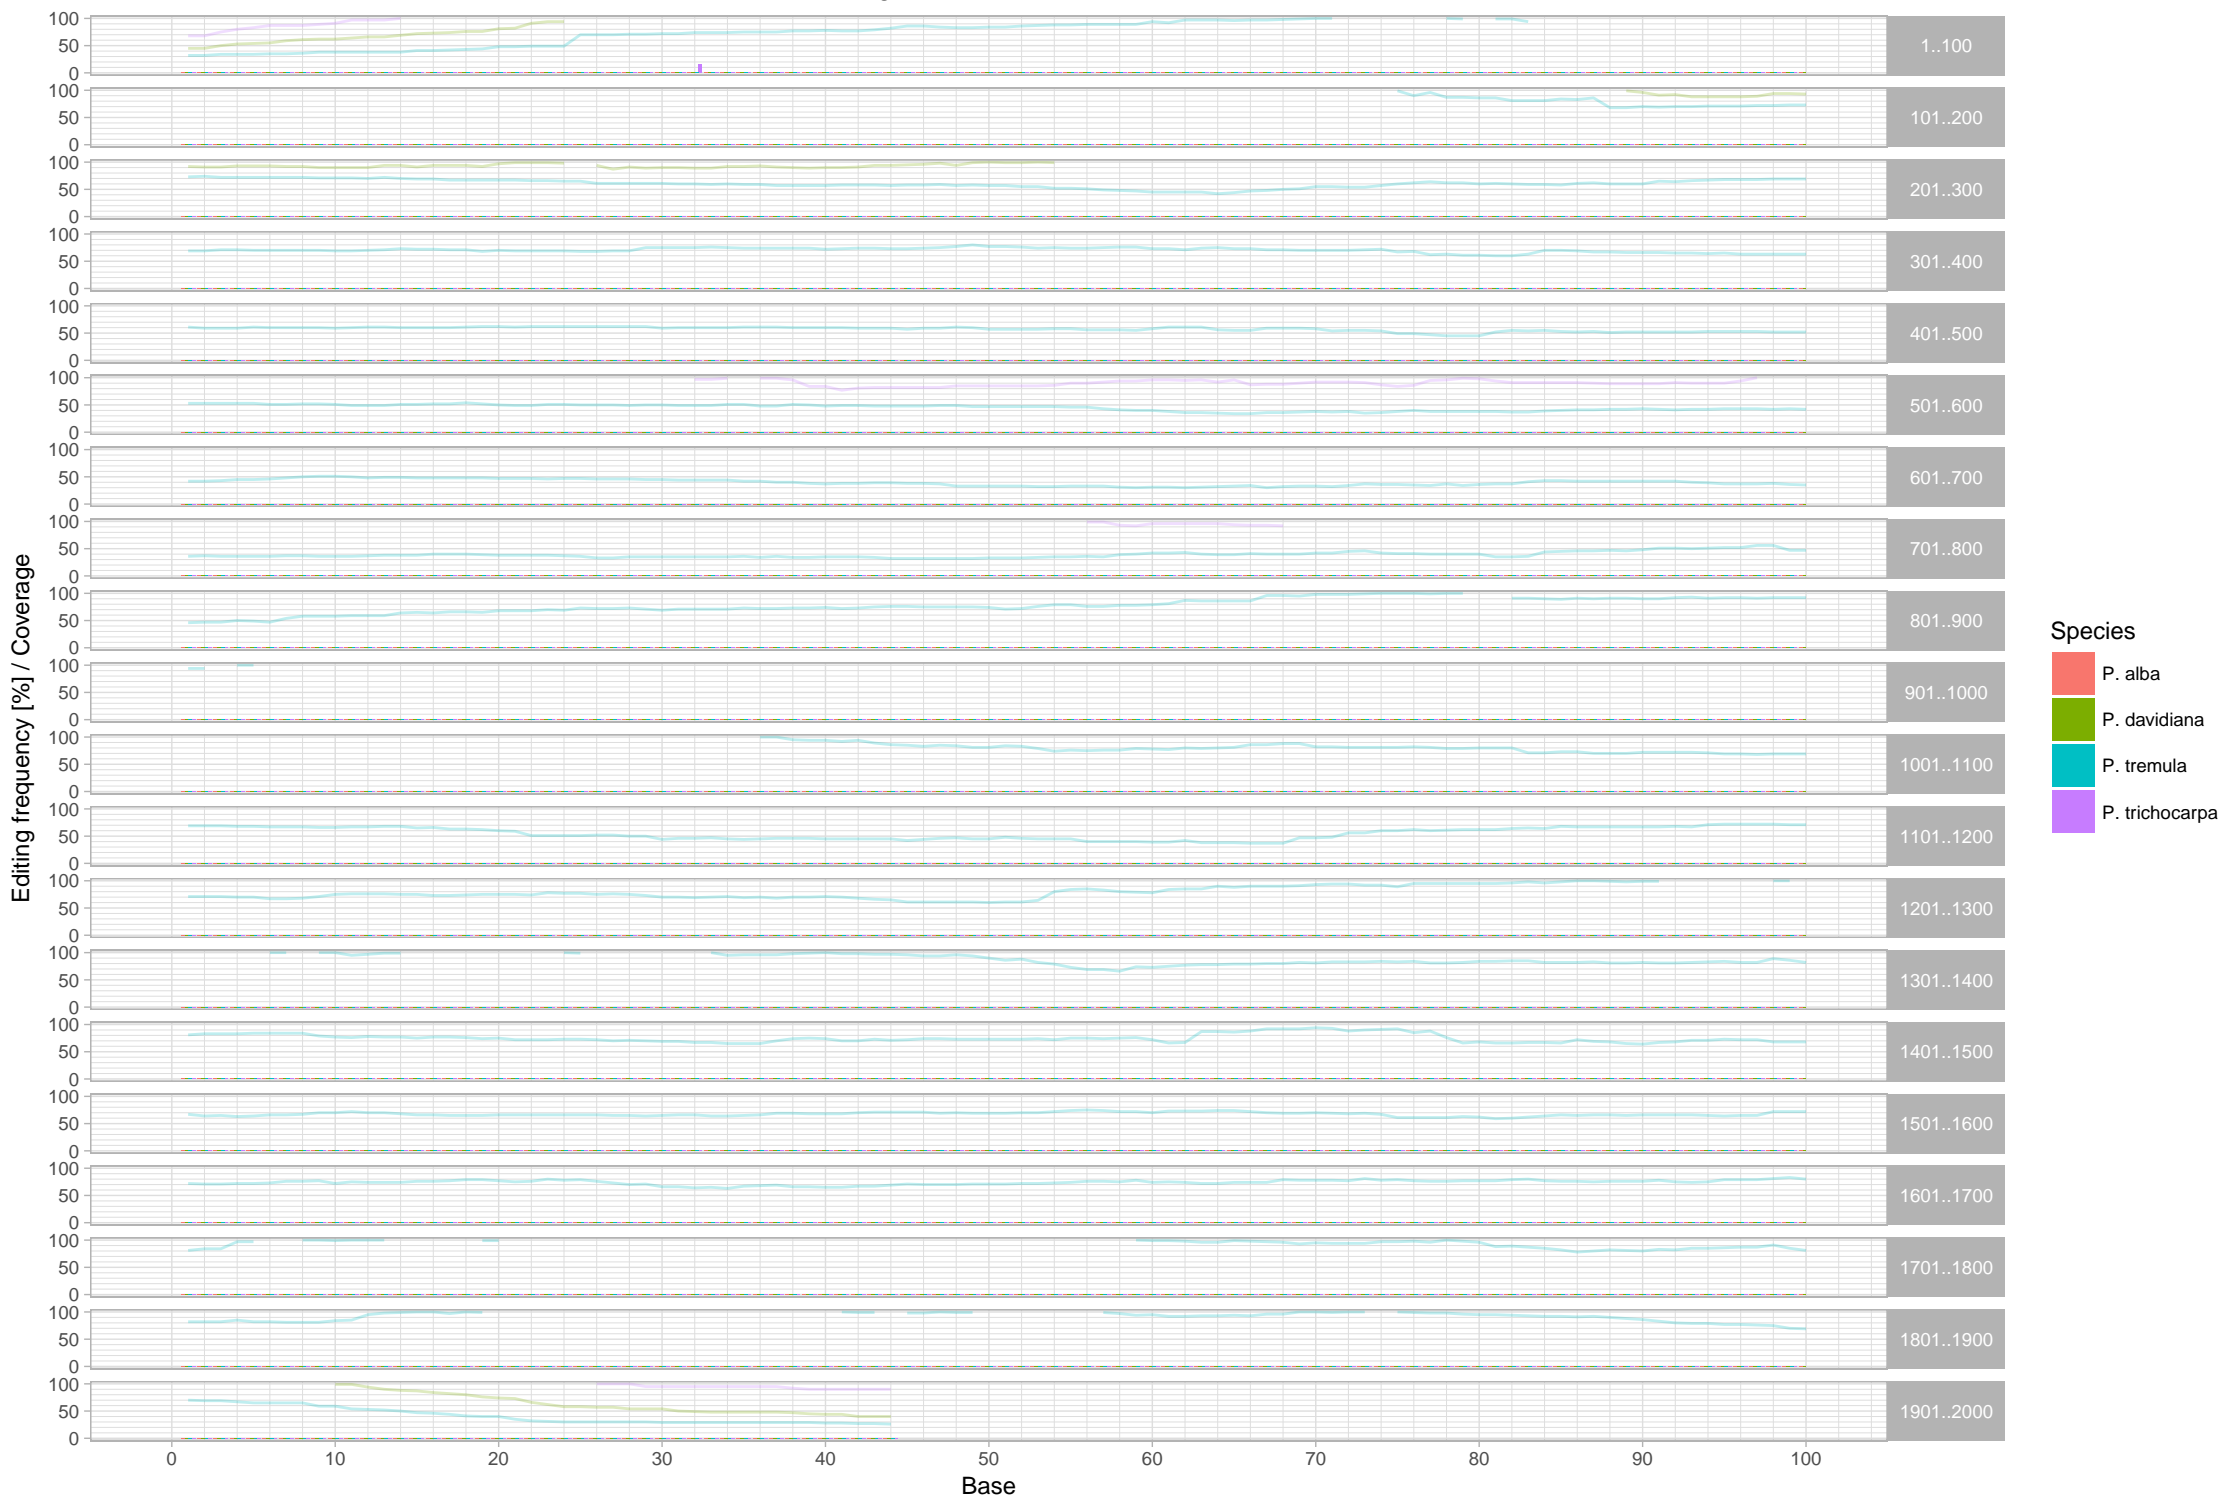

# RNA editing sites in mttB ALH07301.1

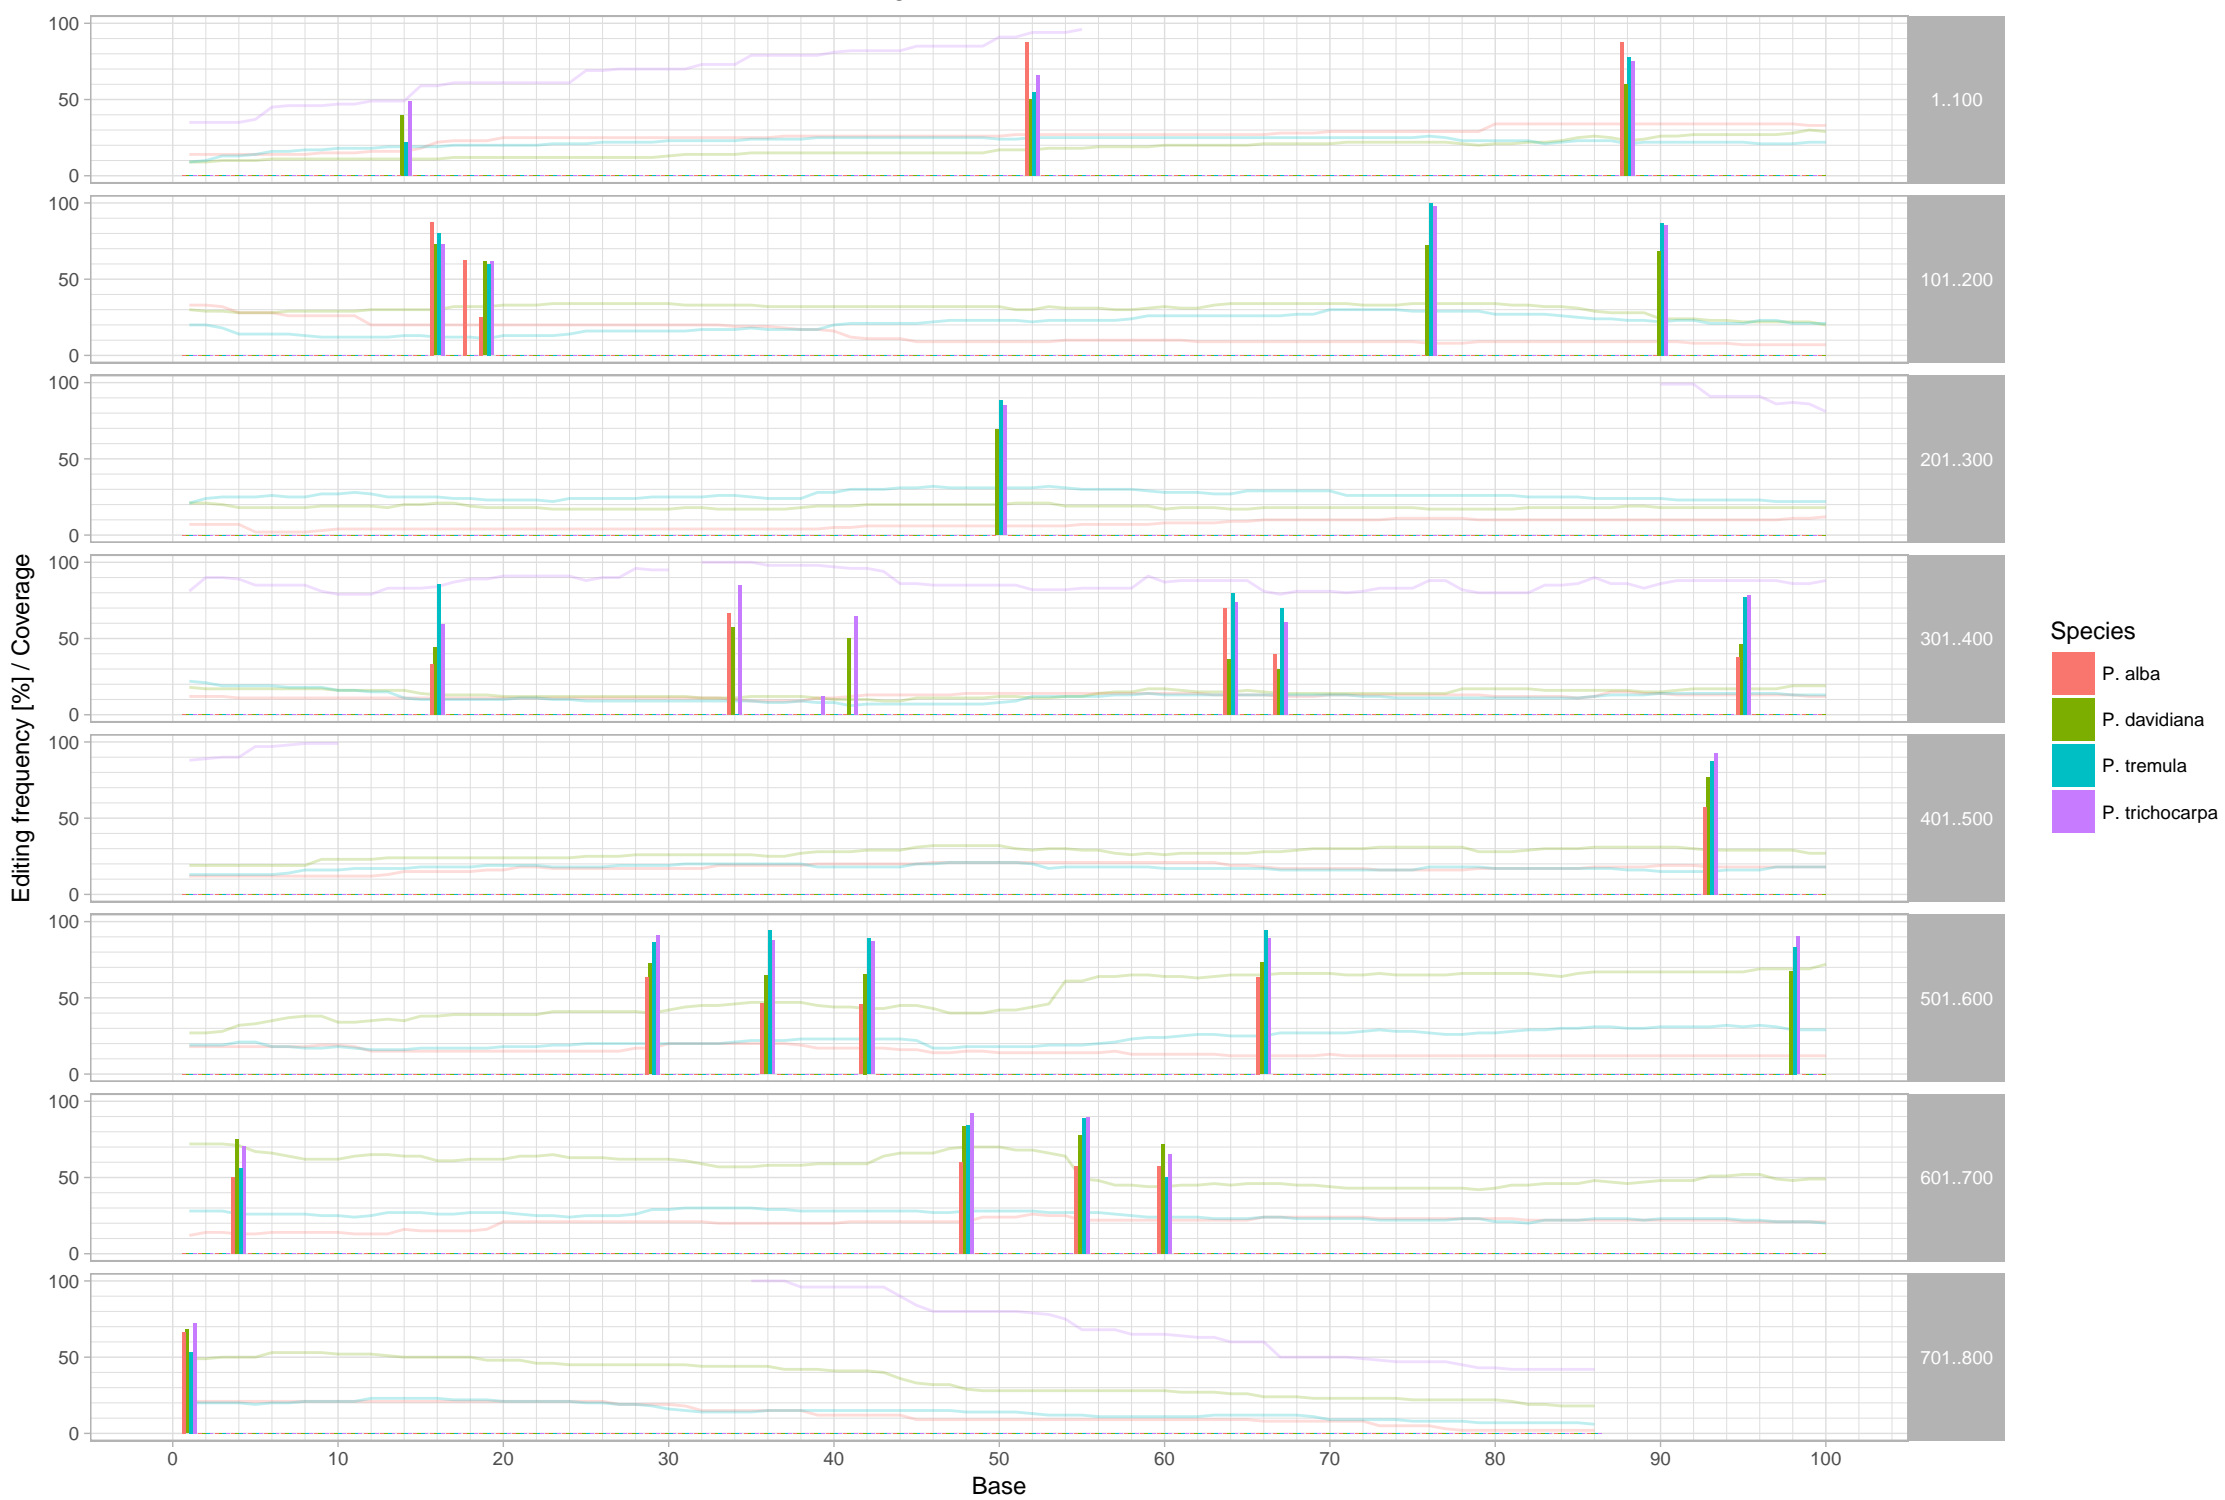

# RNA editing sites in nad1 ALH07304.1

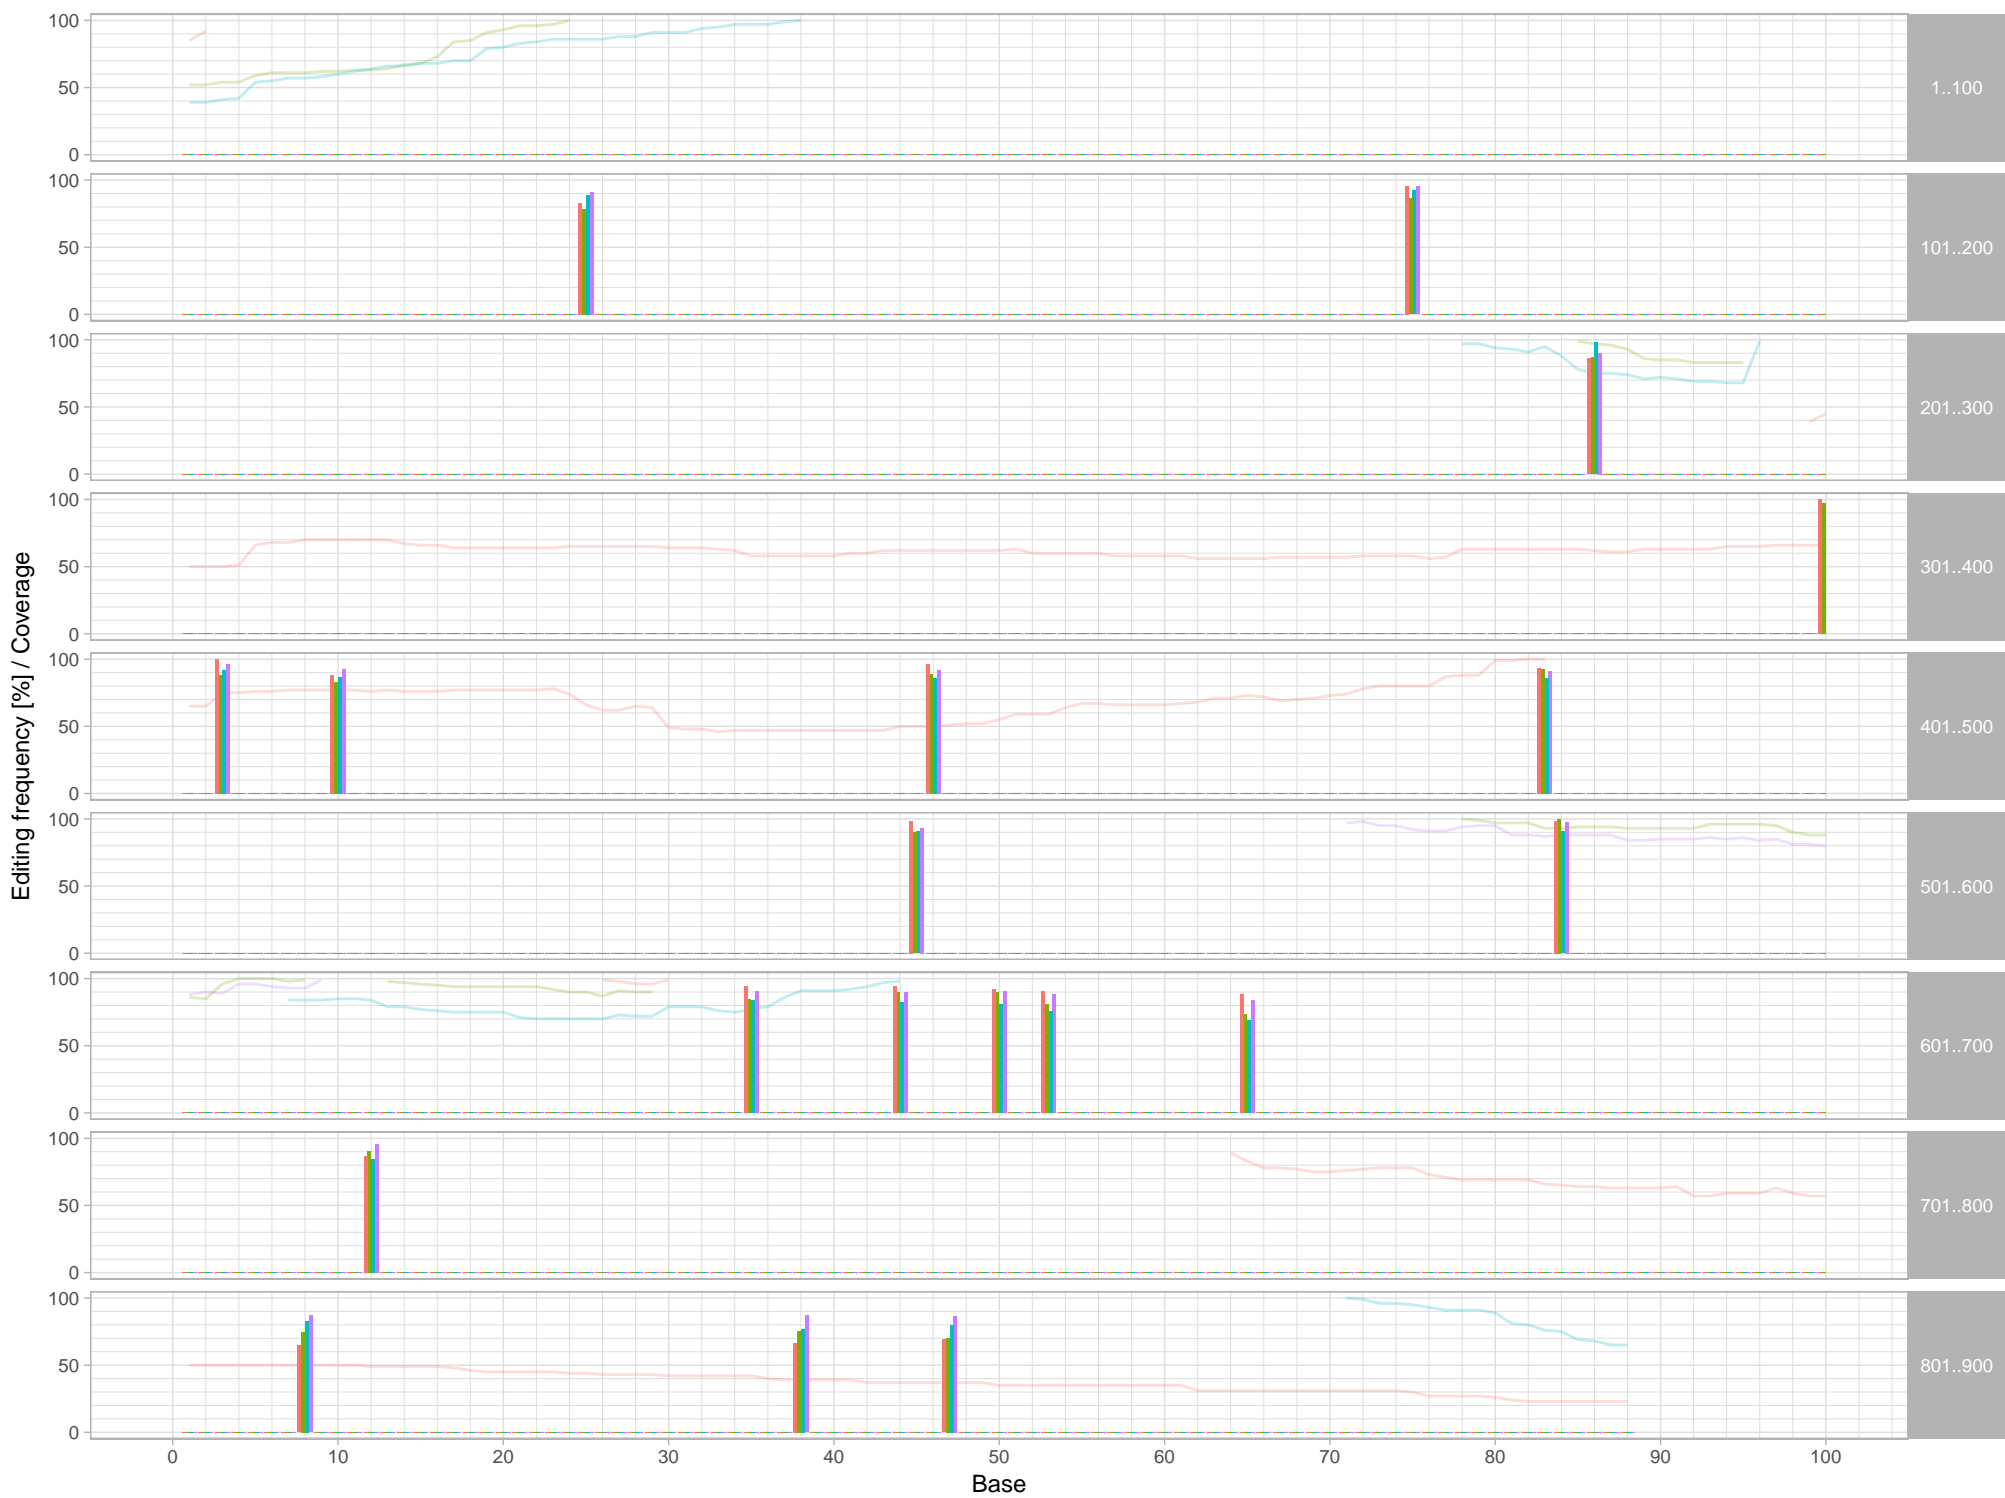

# RNA editing sites in nad2 ALH07305.1

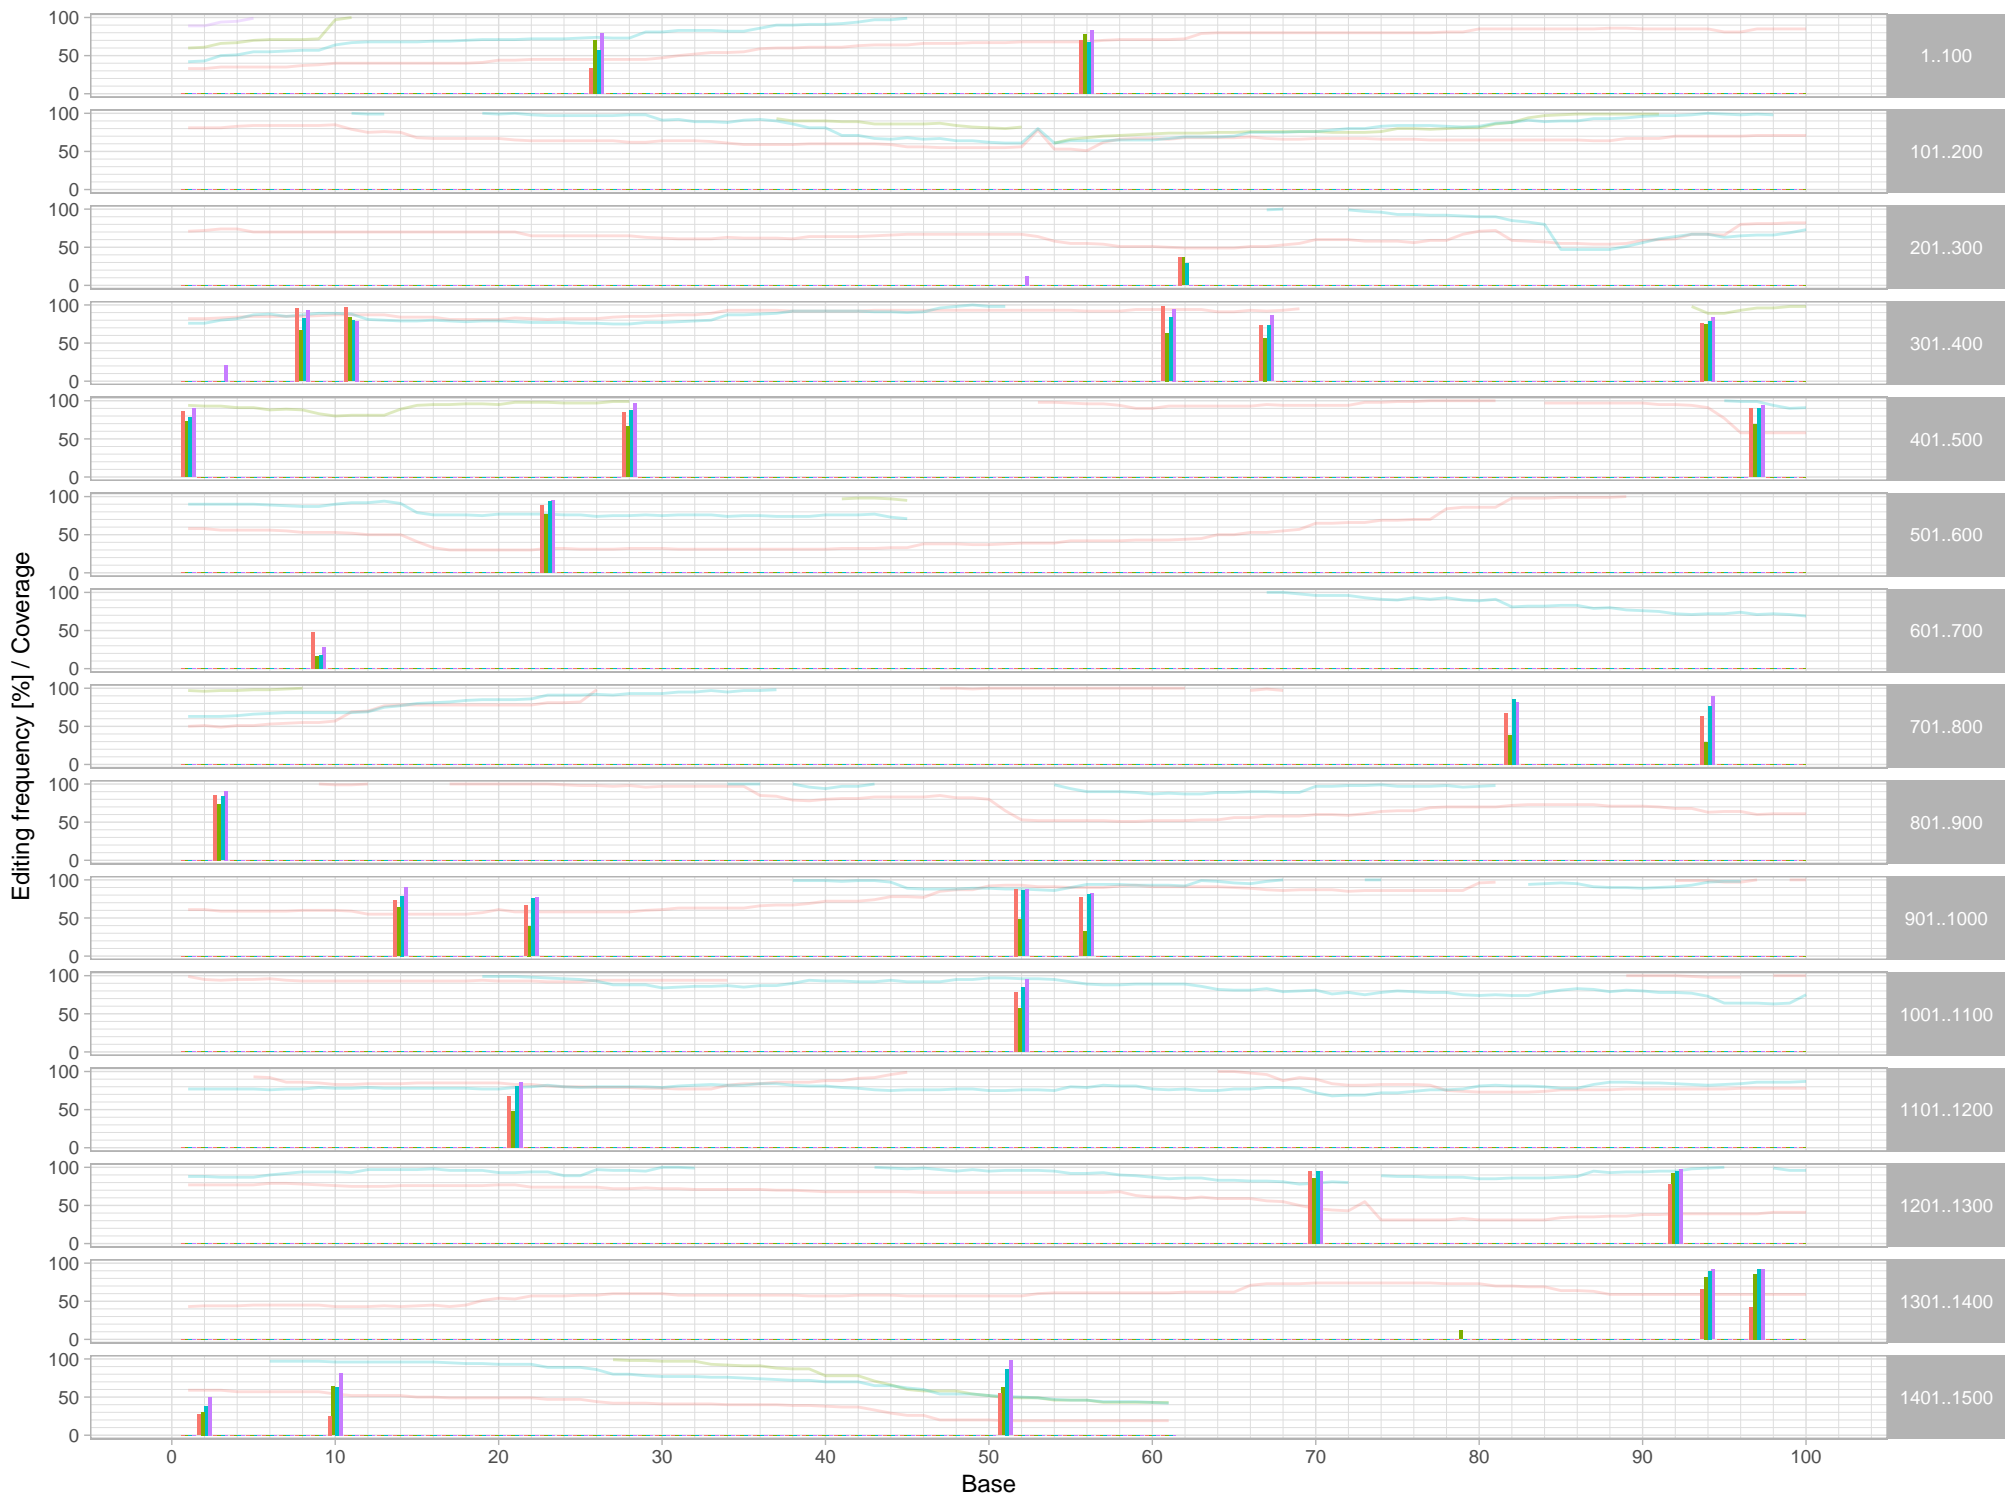

# RNA editing sites in nad3 ALH07302.1

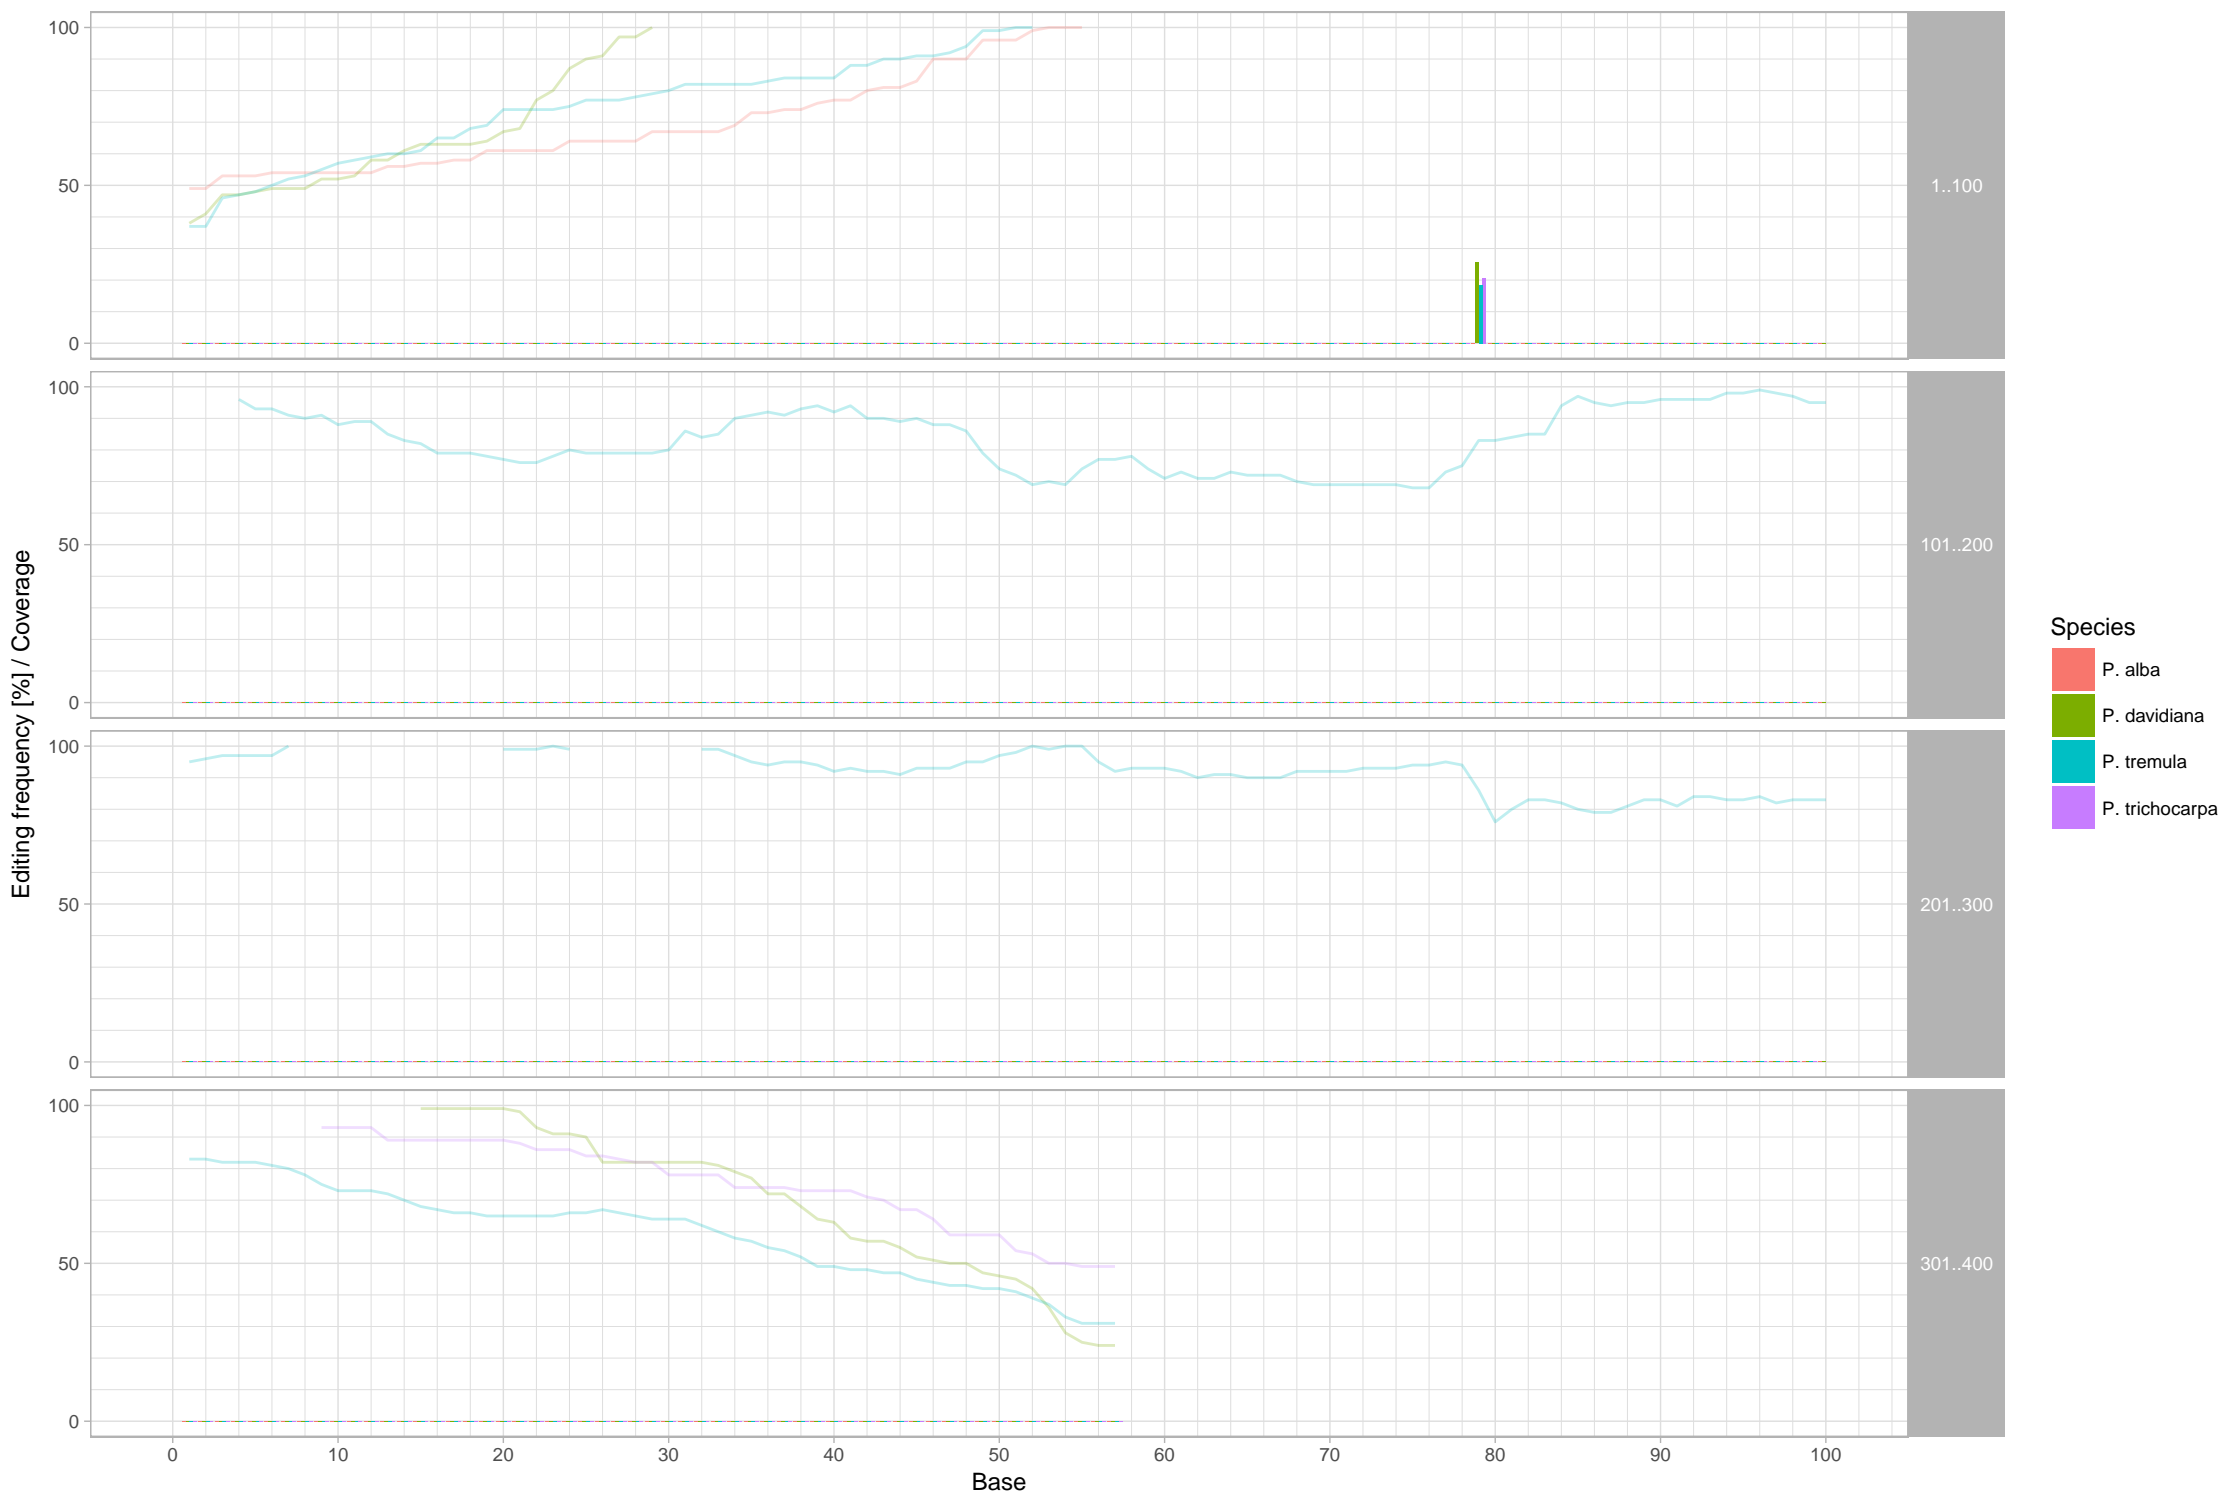

# RNA editing sites in nad4 ALH07303.1

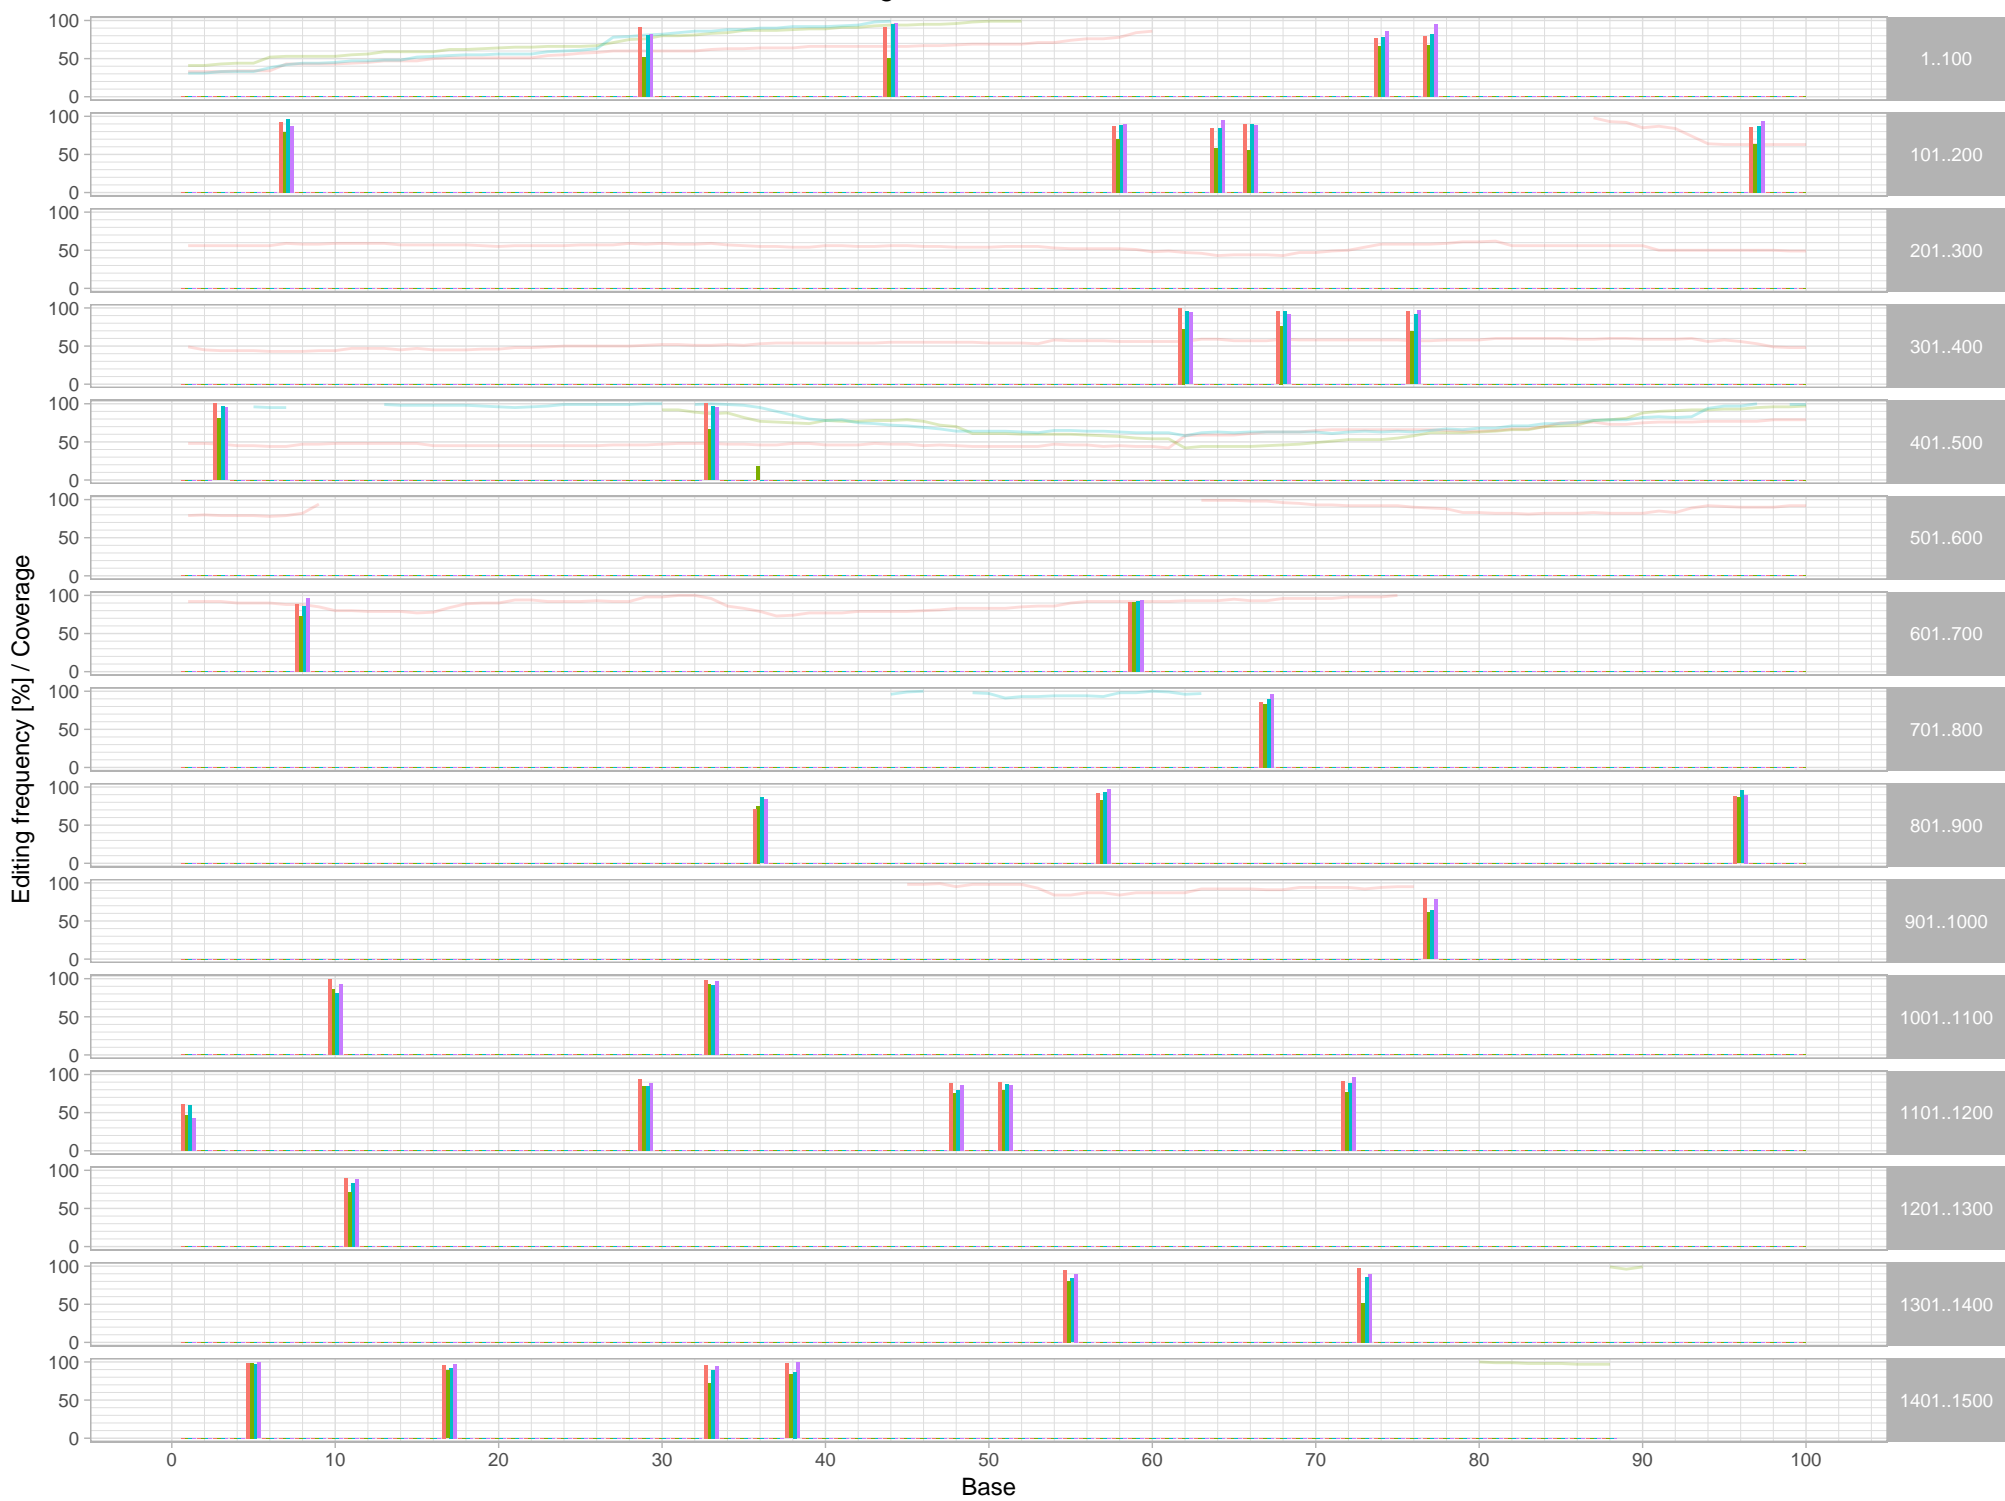



# RNA editing sites in nad4L ALH07306.1

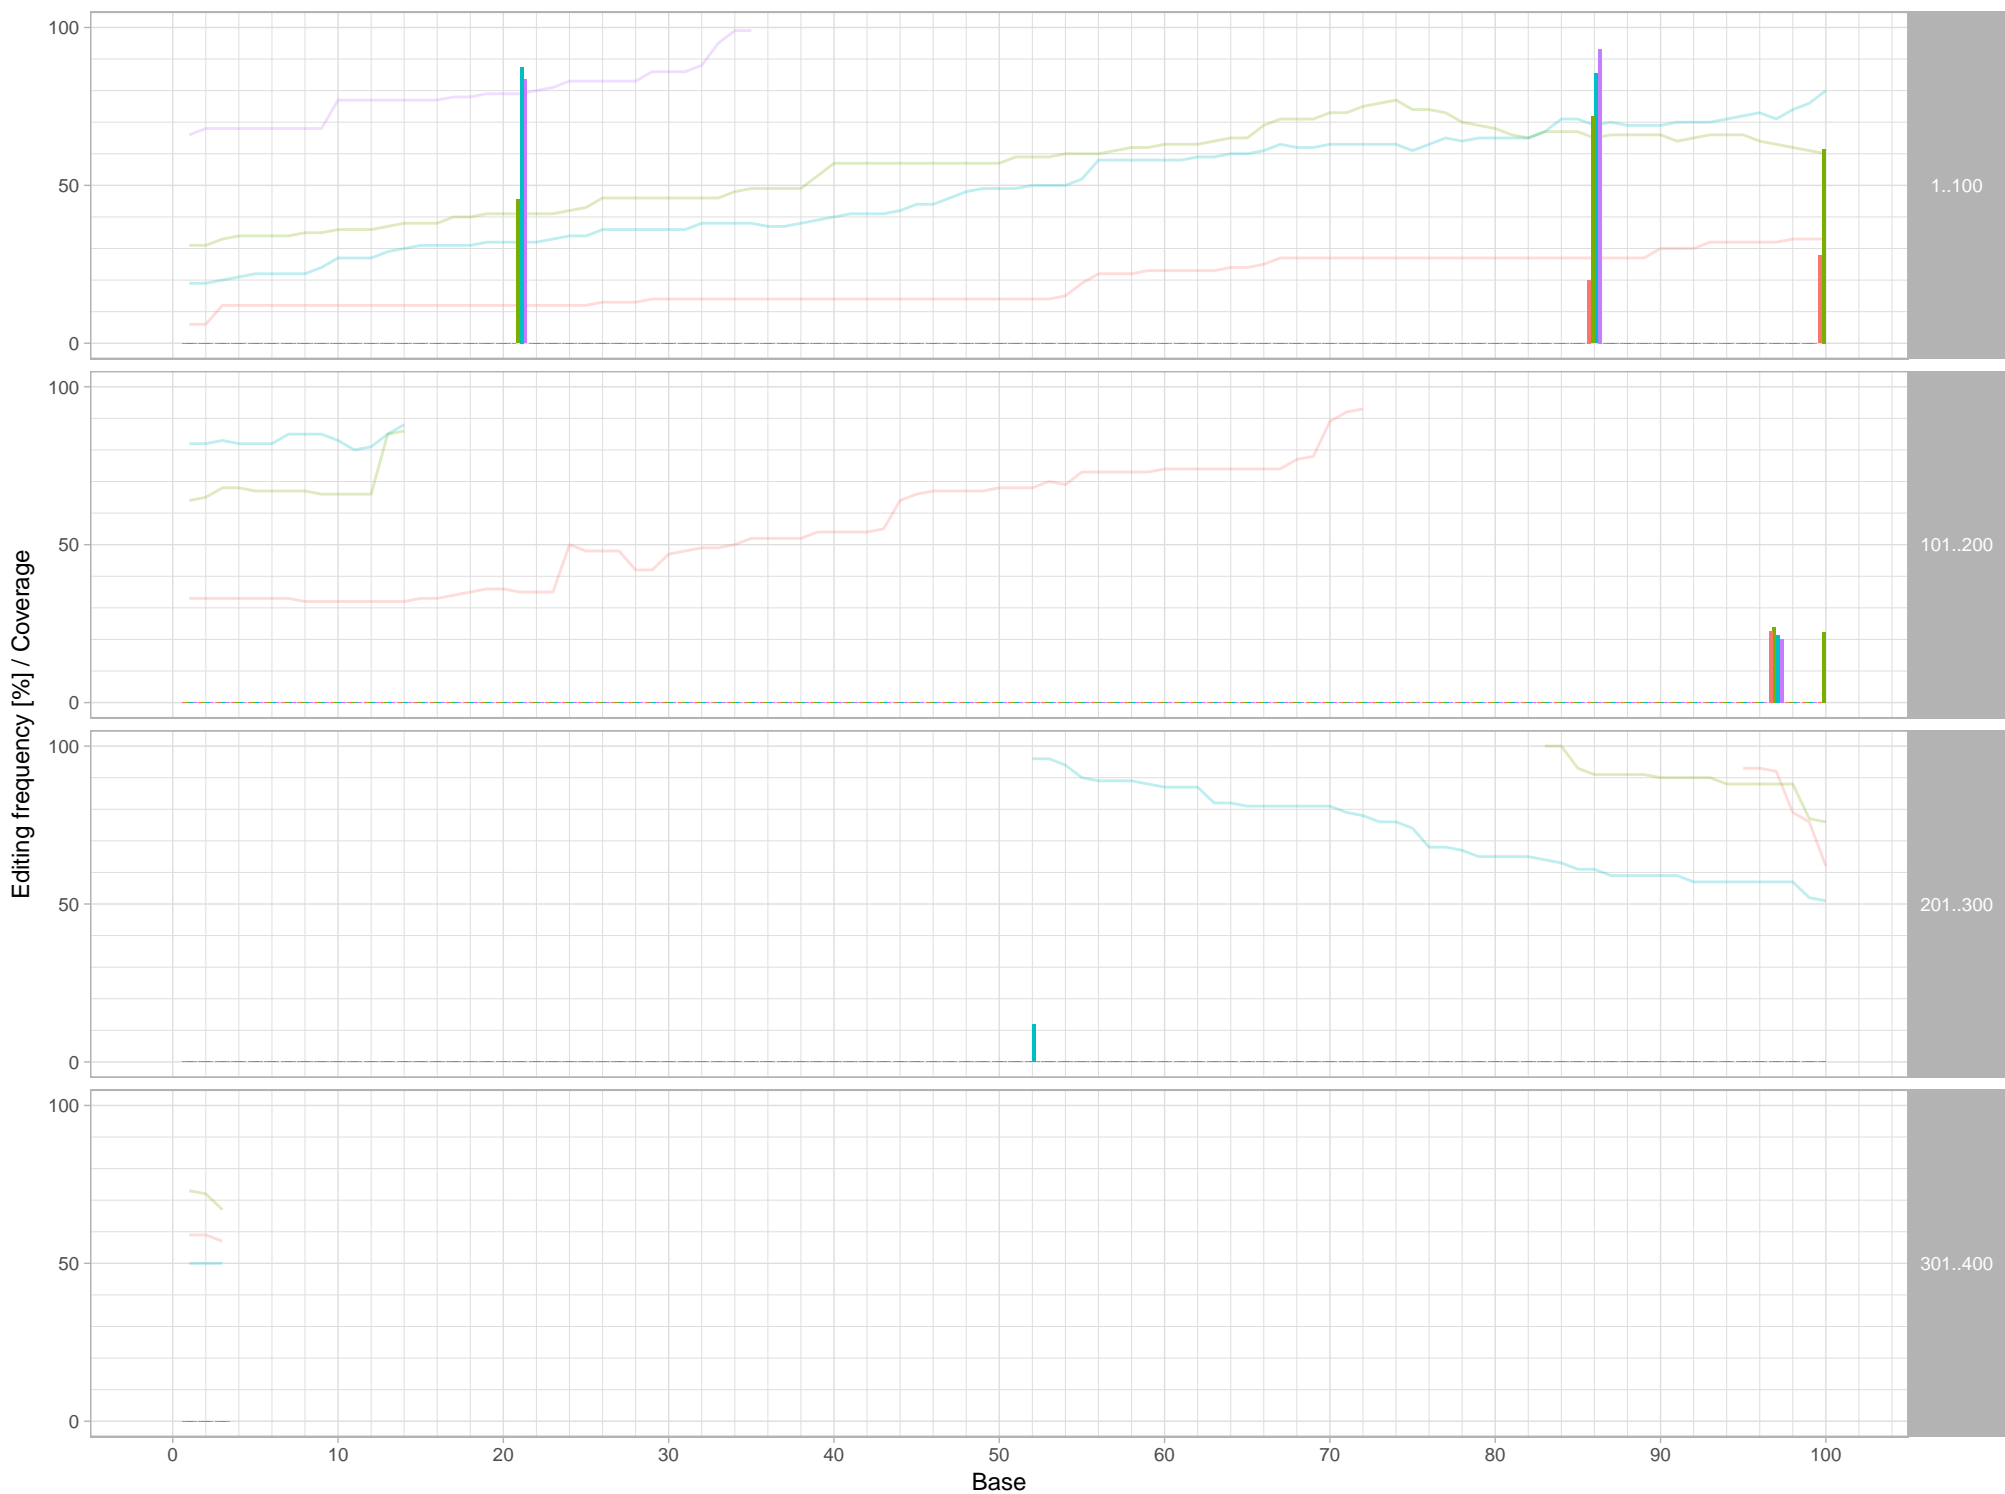

# RNA editing sites in nad5 ALH07307.1

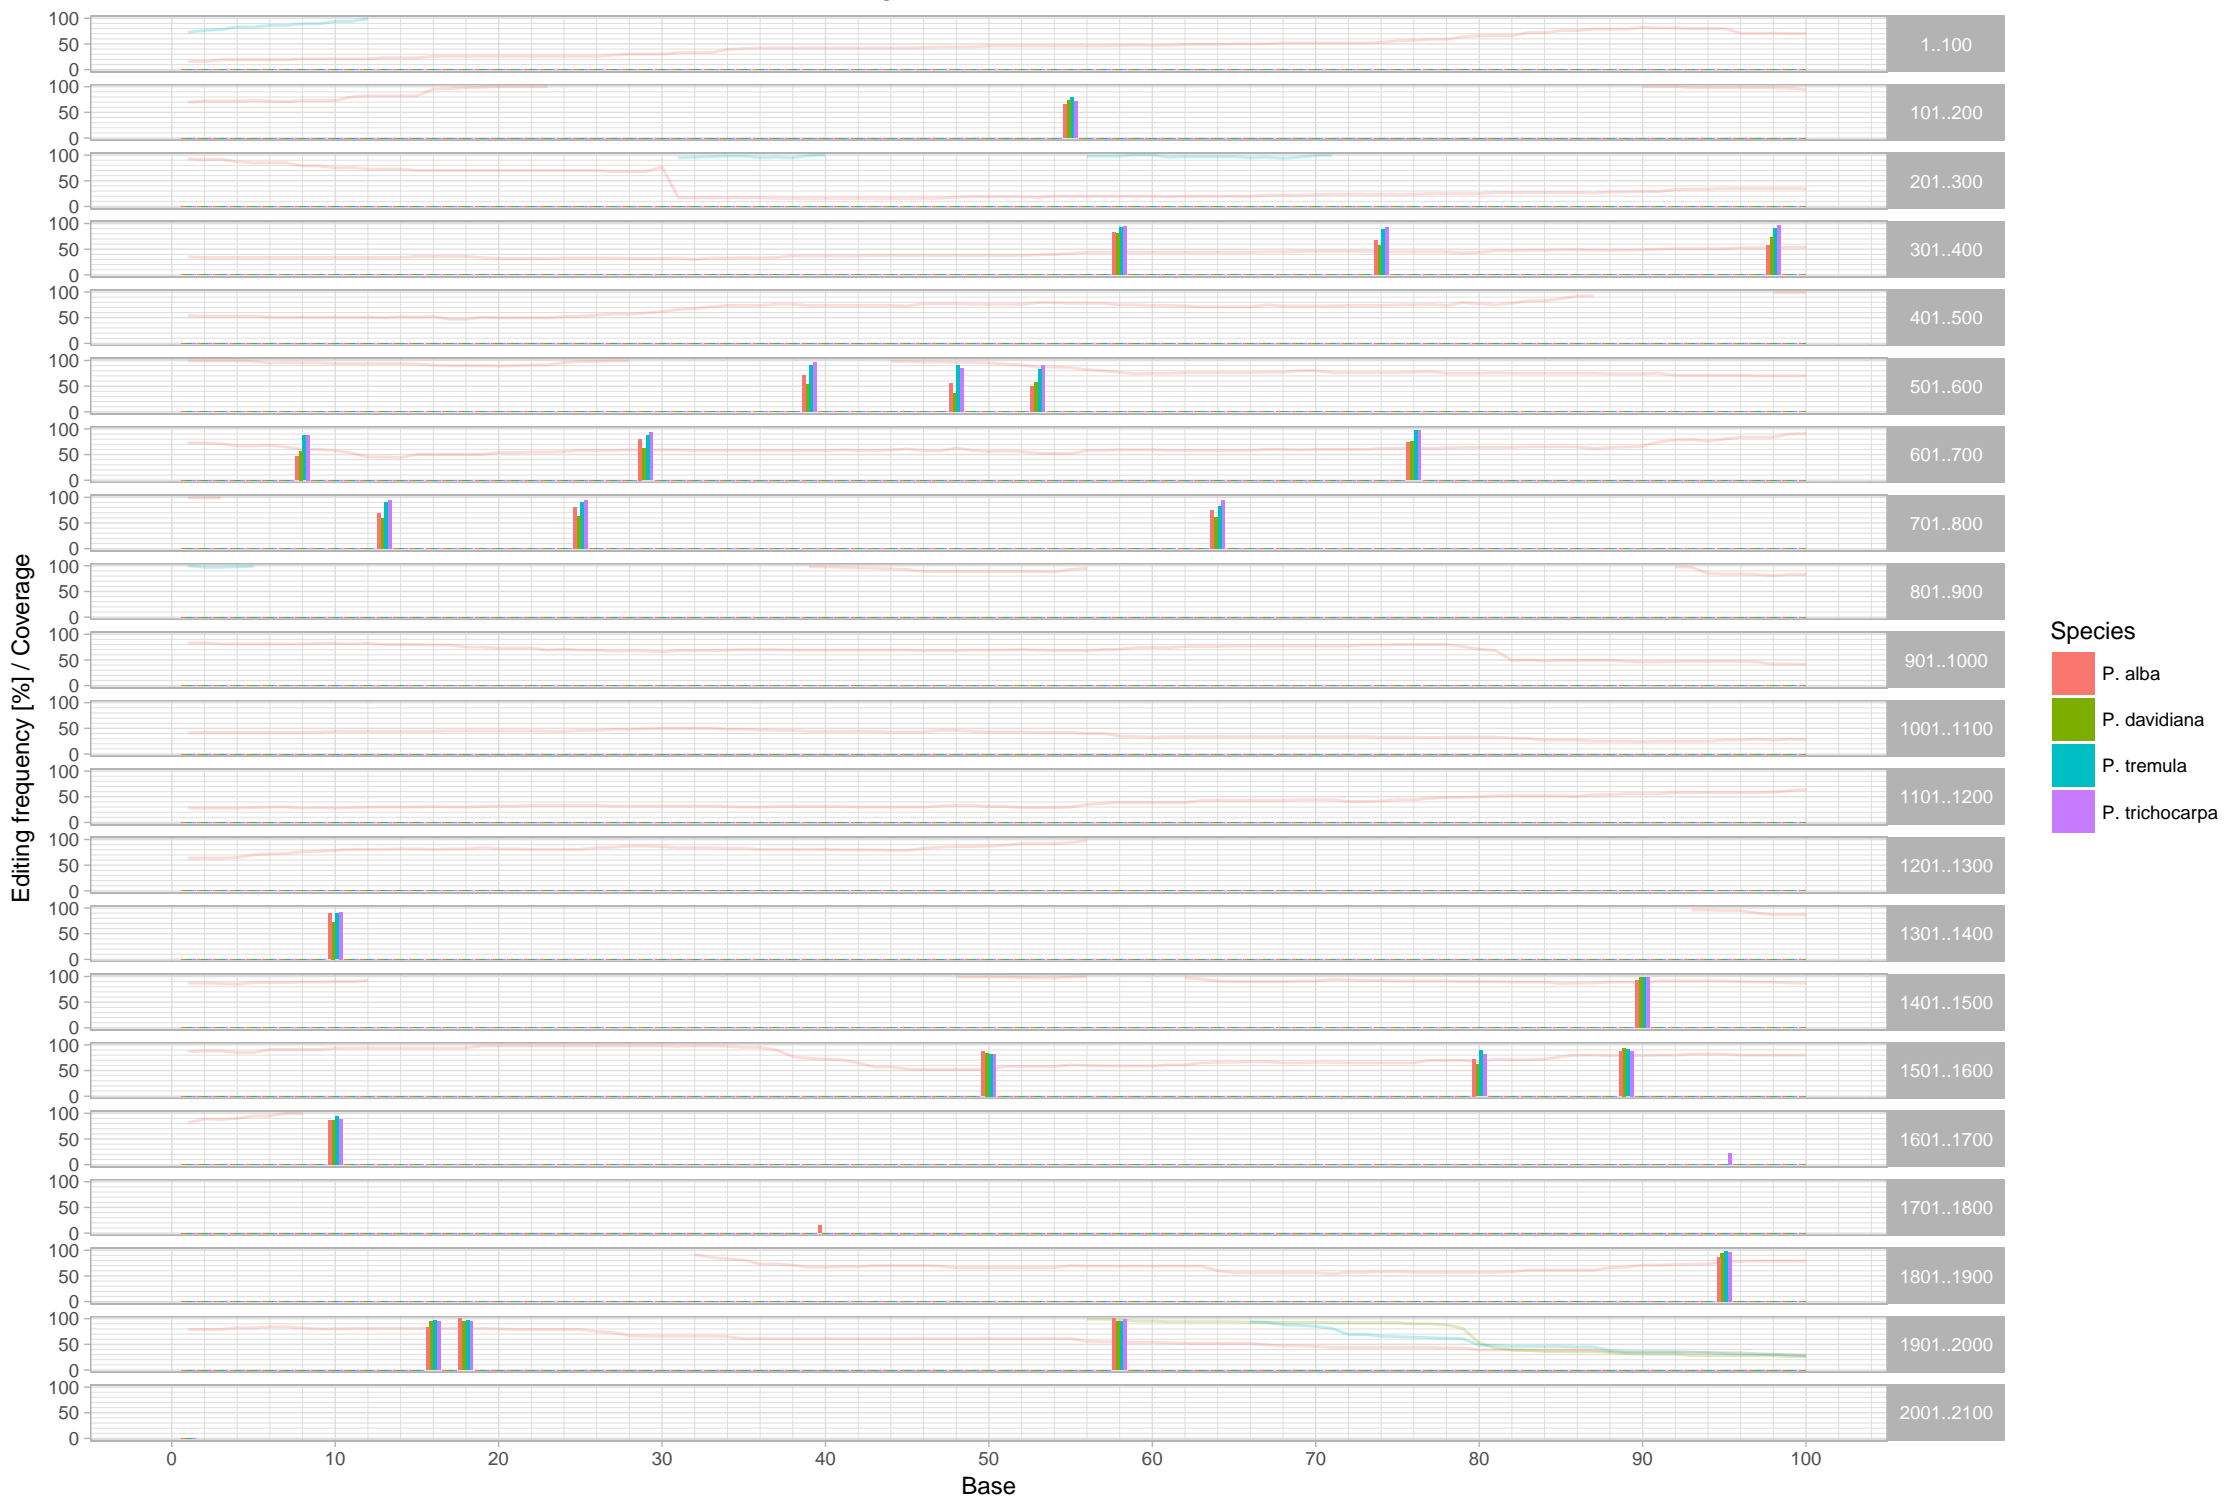

# RNA editing sites in nad6 ALH07308.1

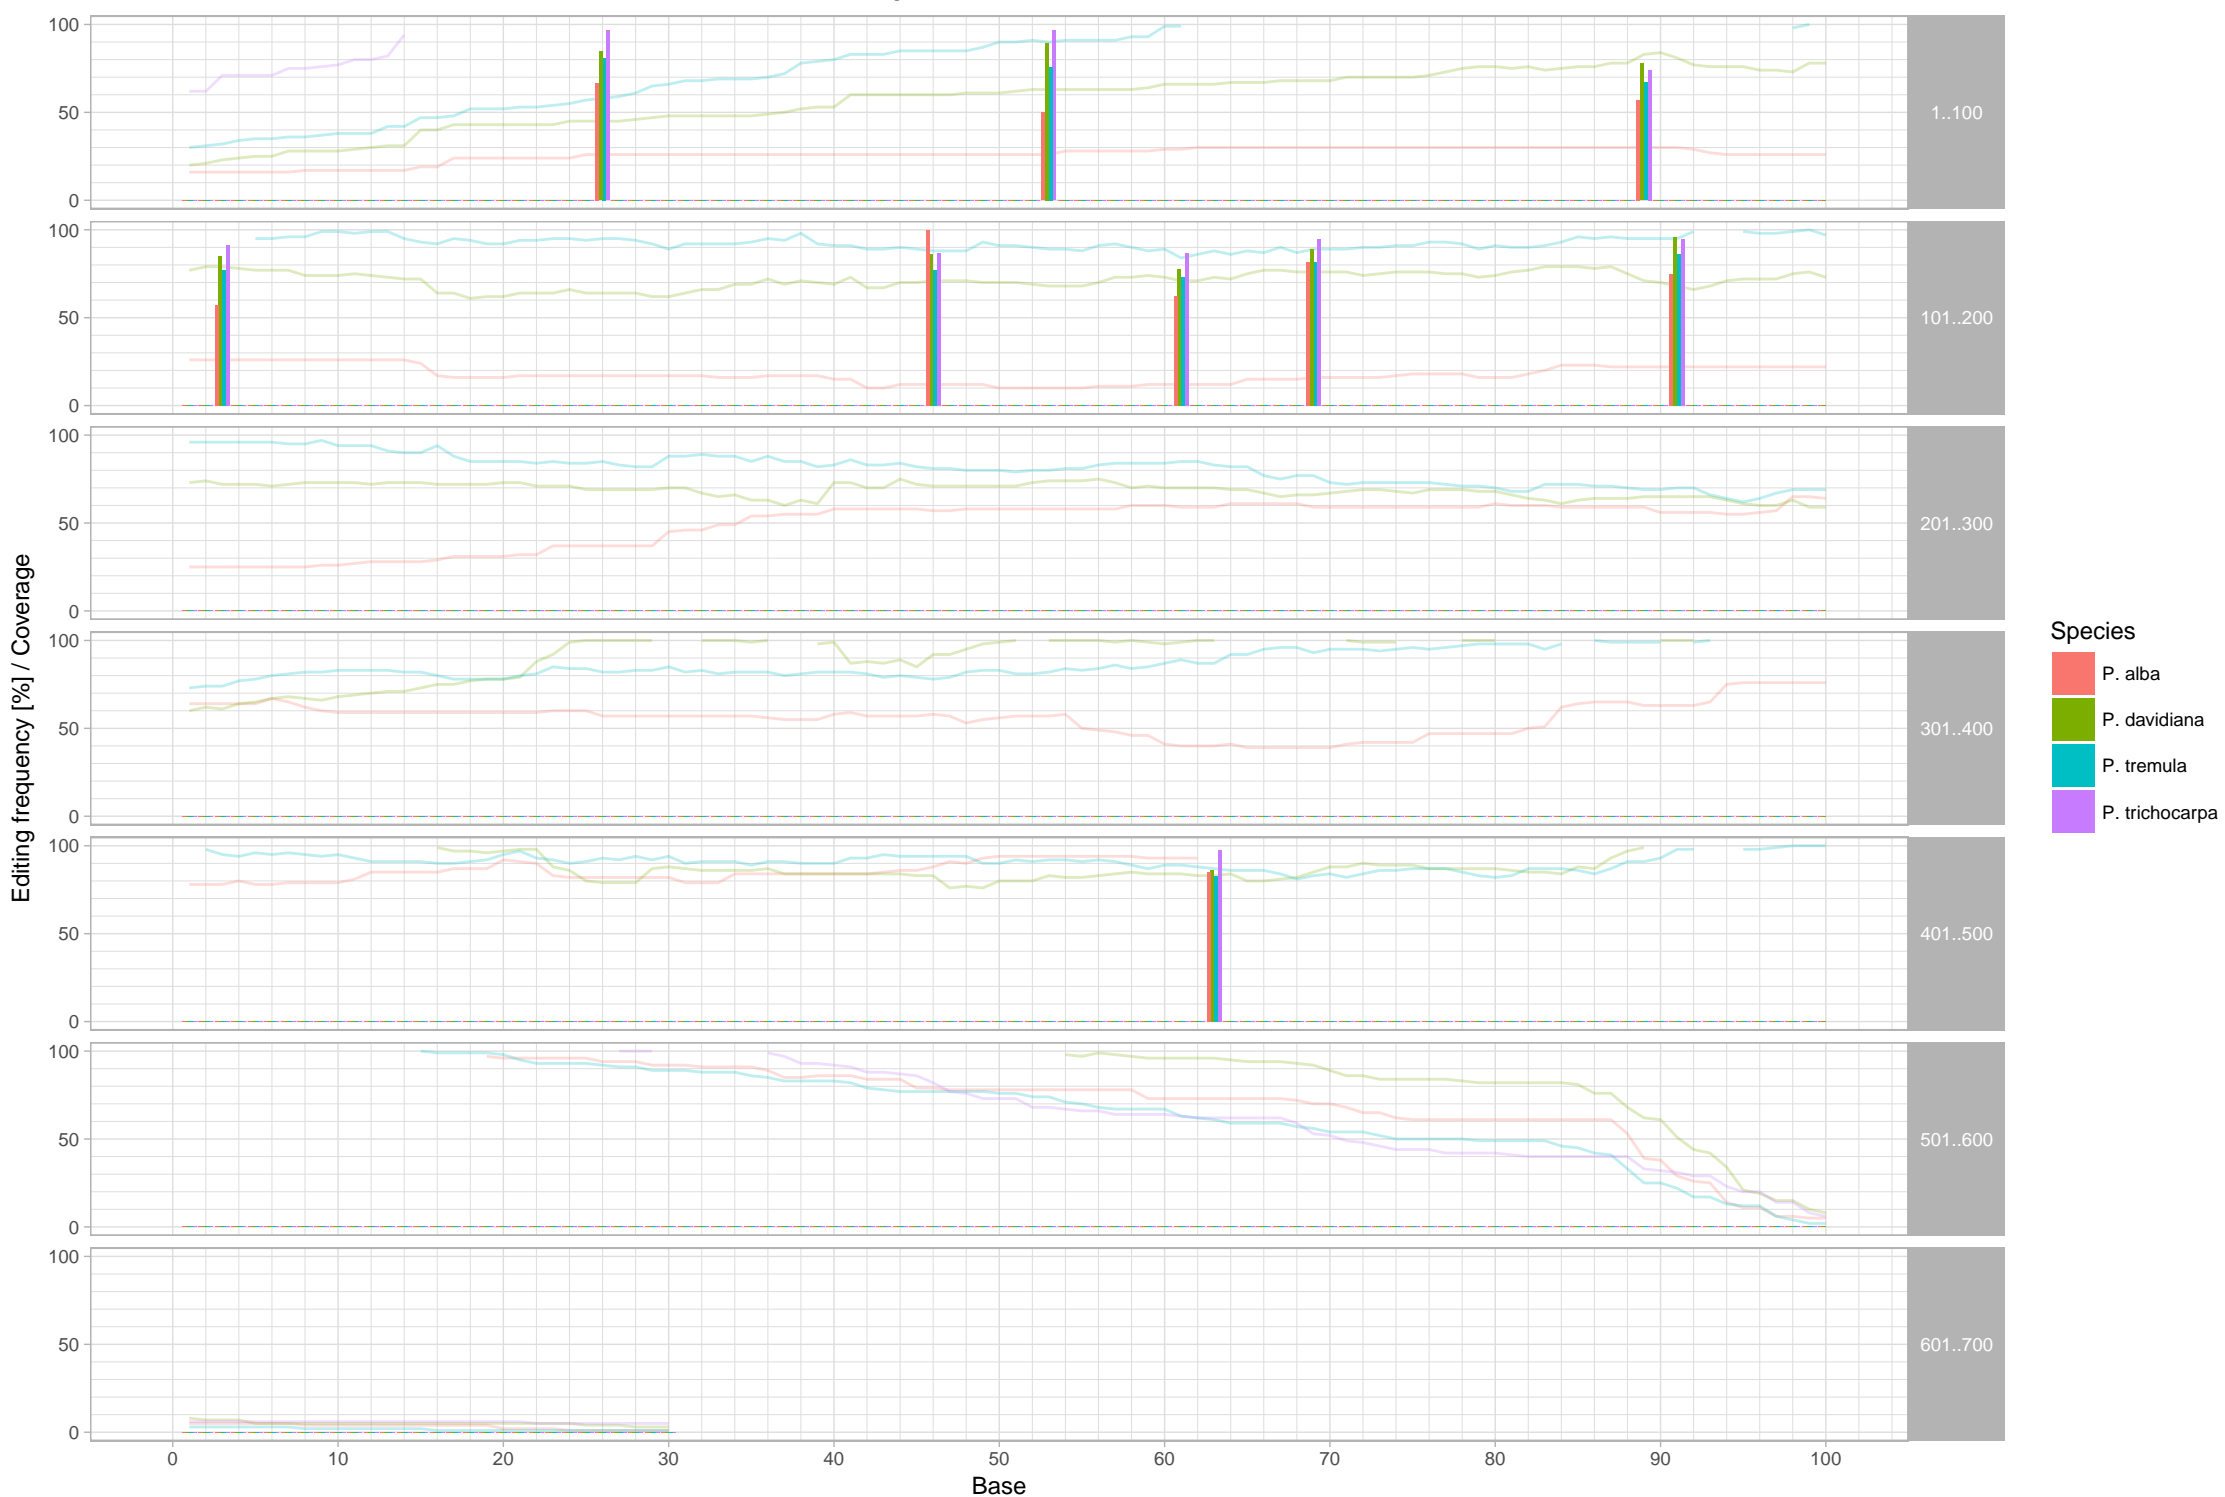

# RNA editing sites in nad7 ALH07310.1

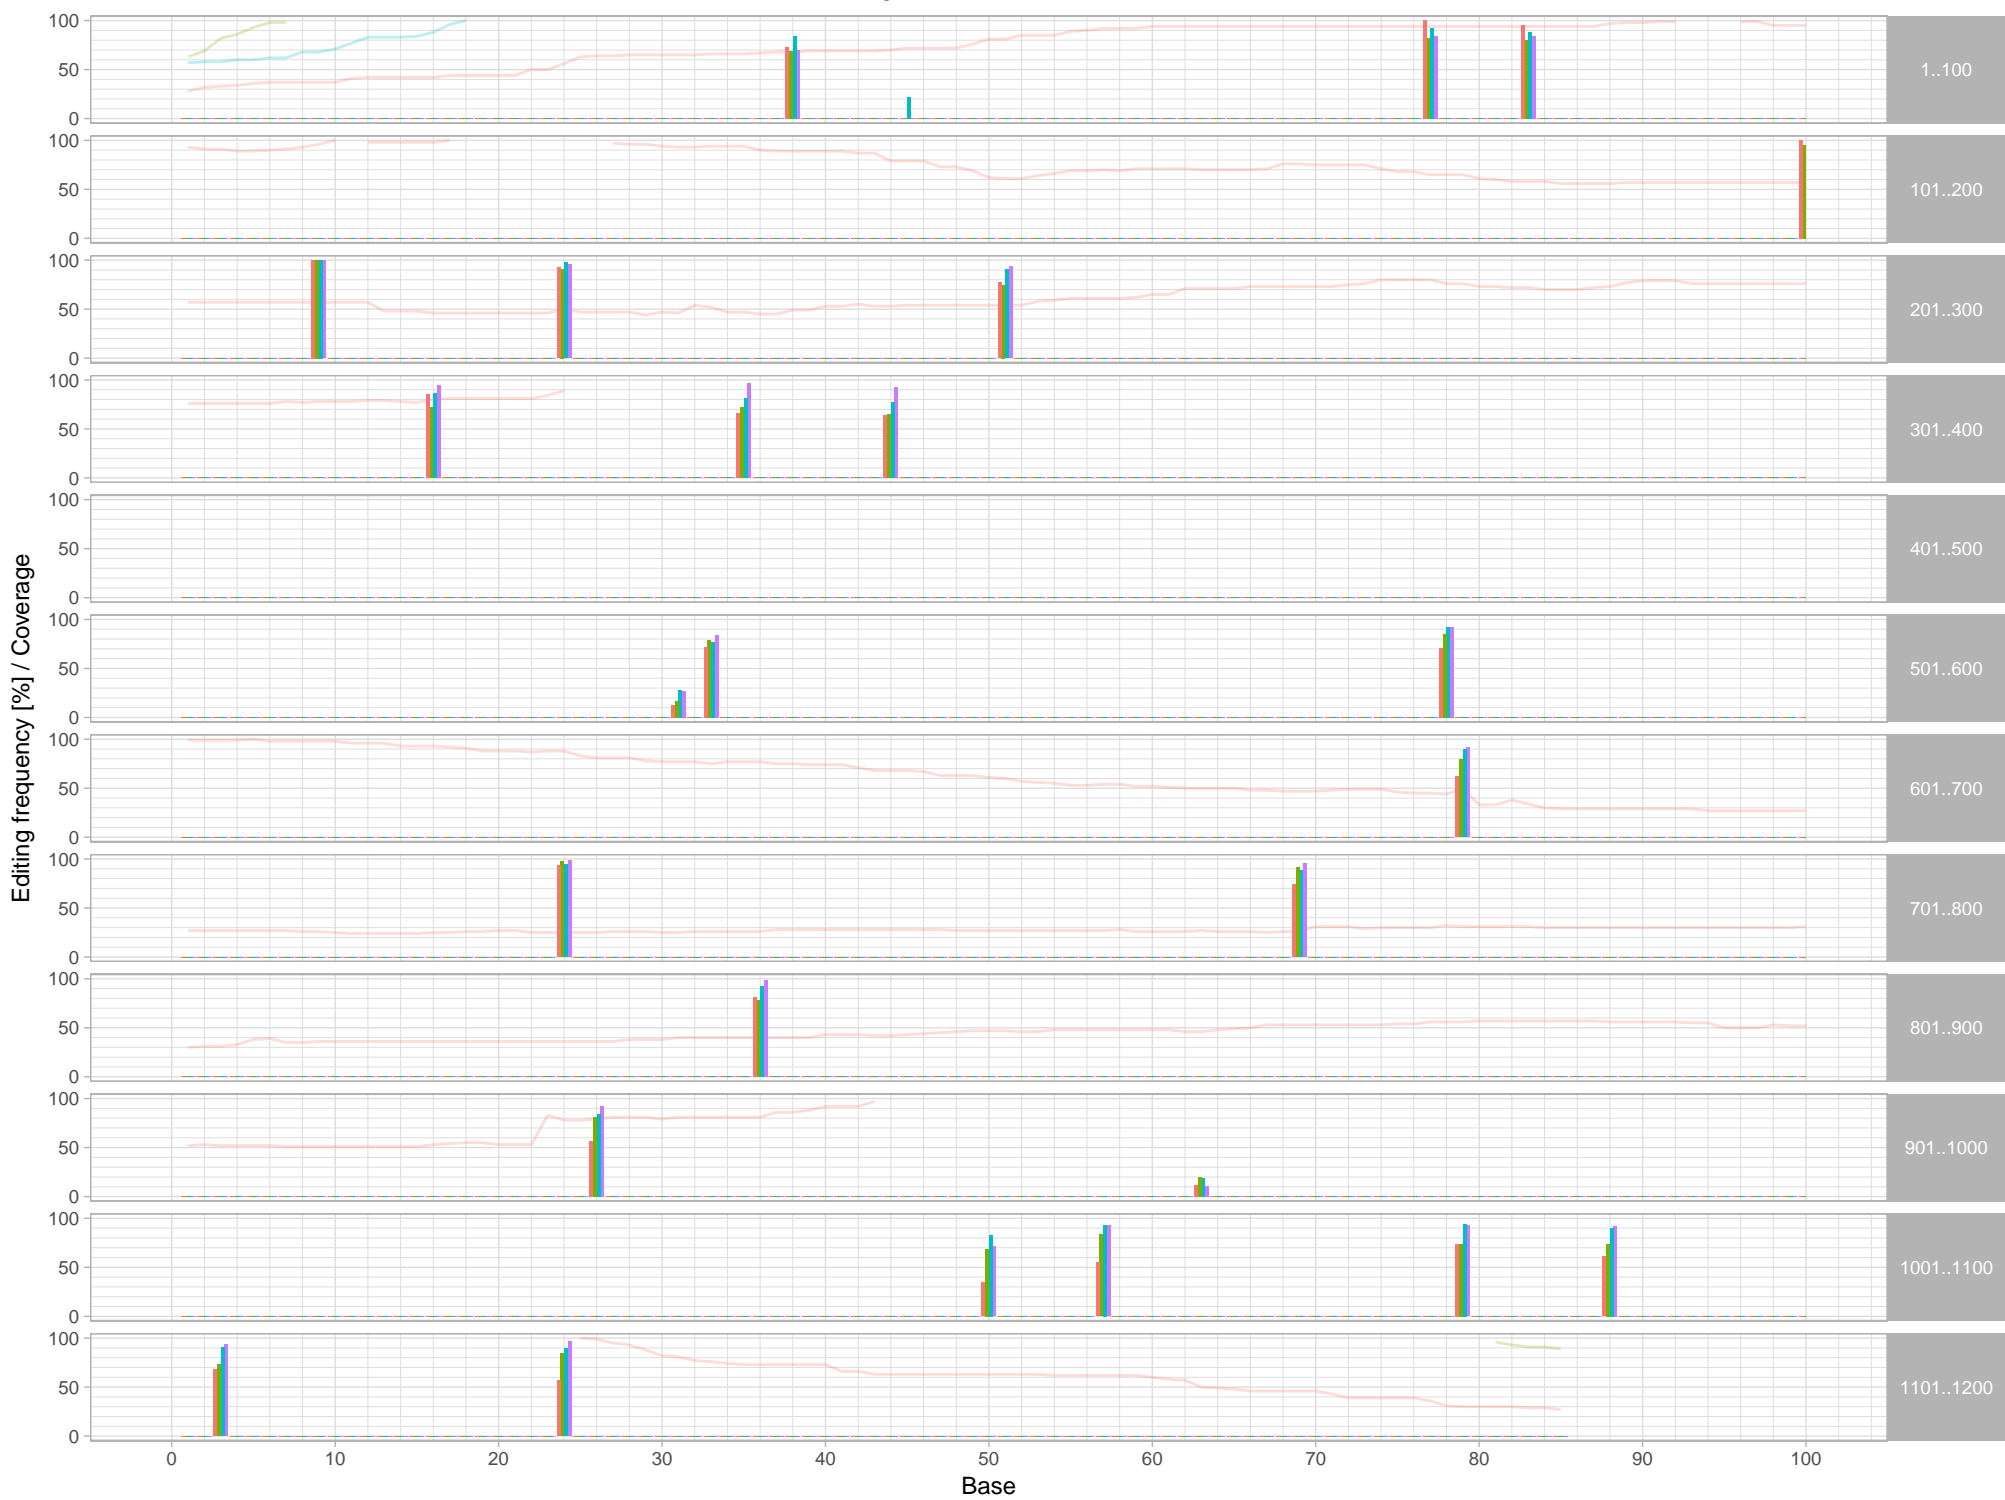

# RNA editing sites in nad9 ALH07309.1

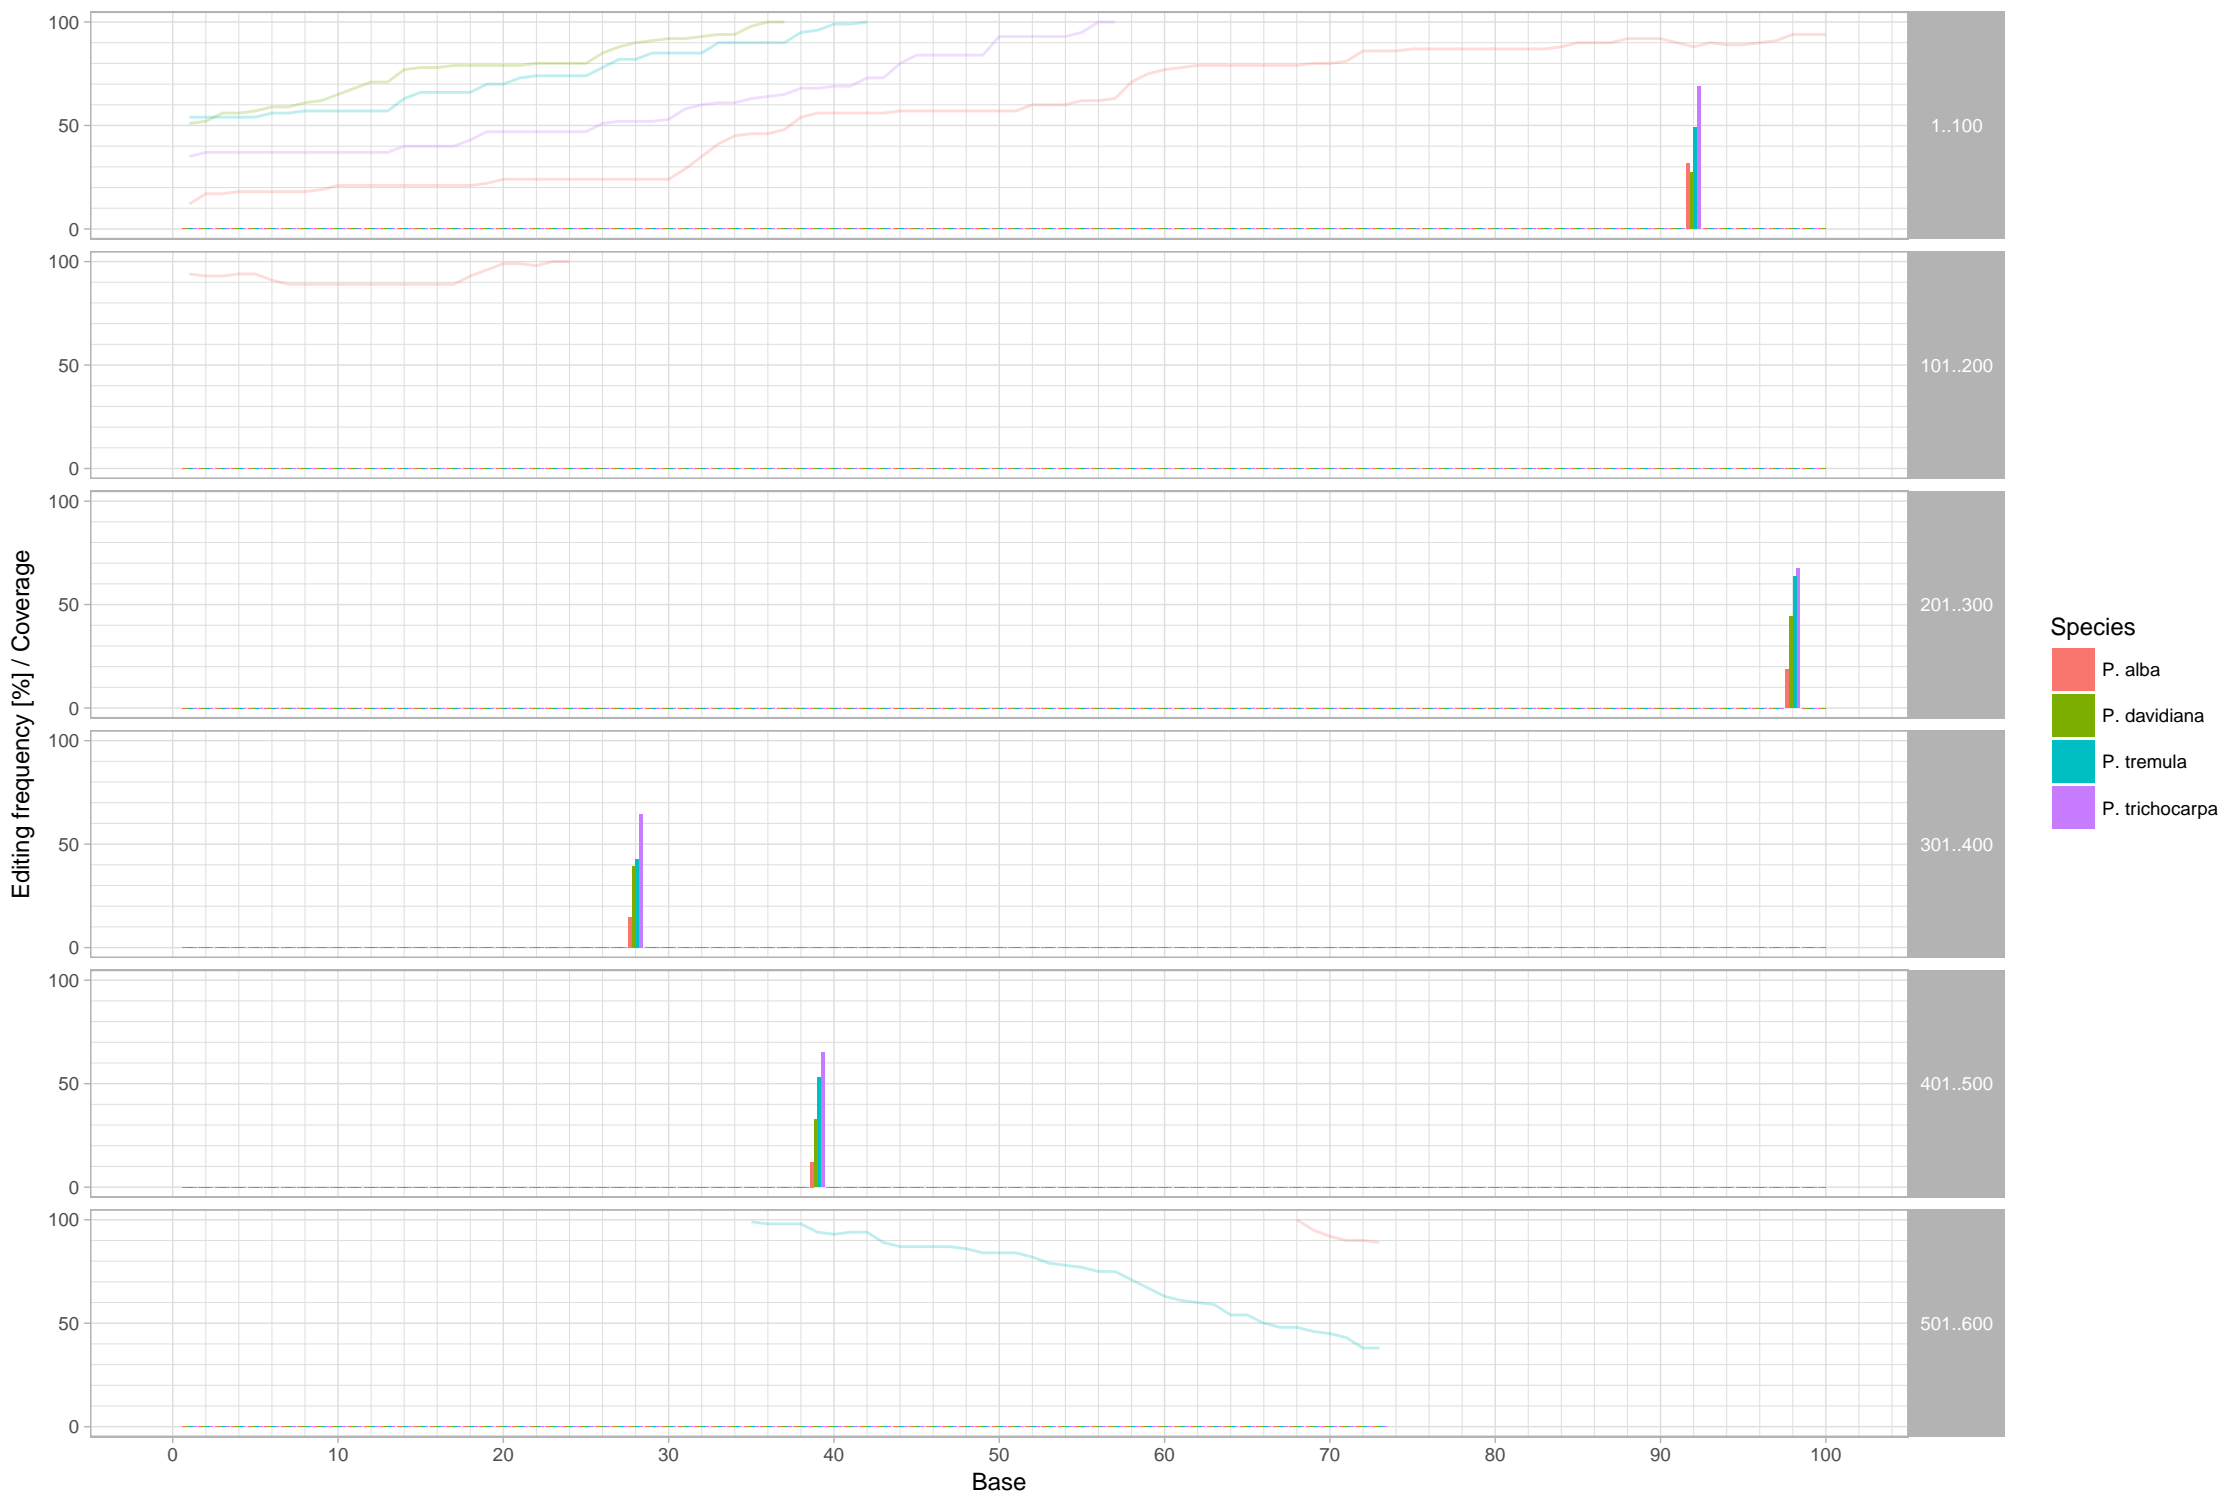

# RNA editing sites in rpl10 ALH07312.1

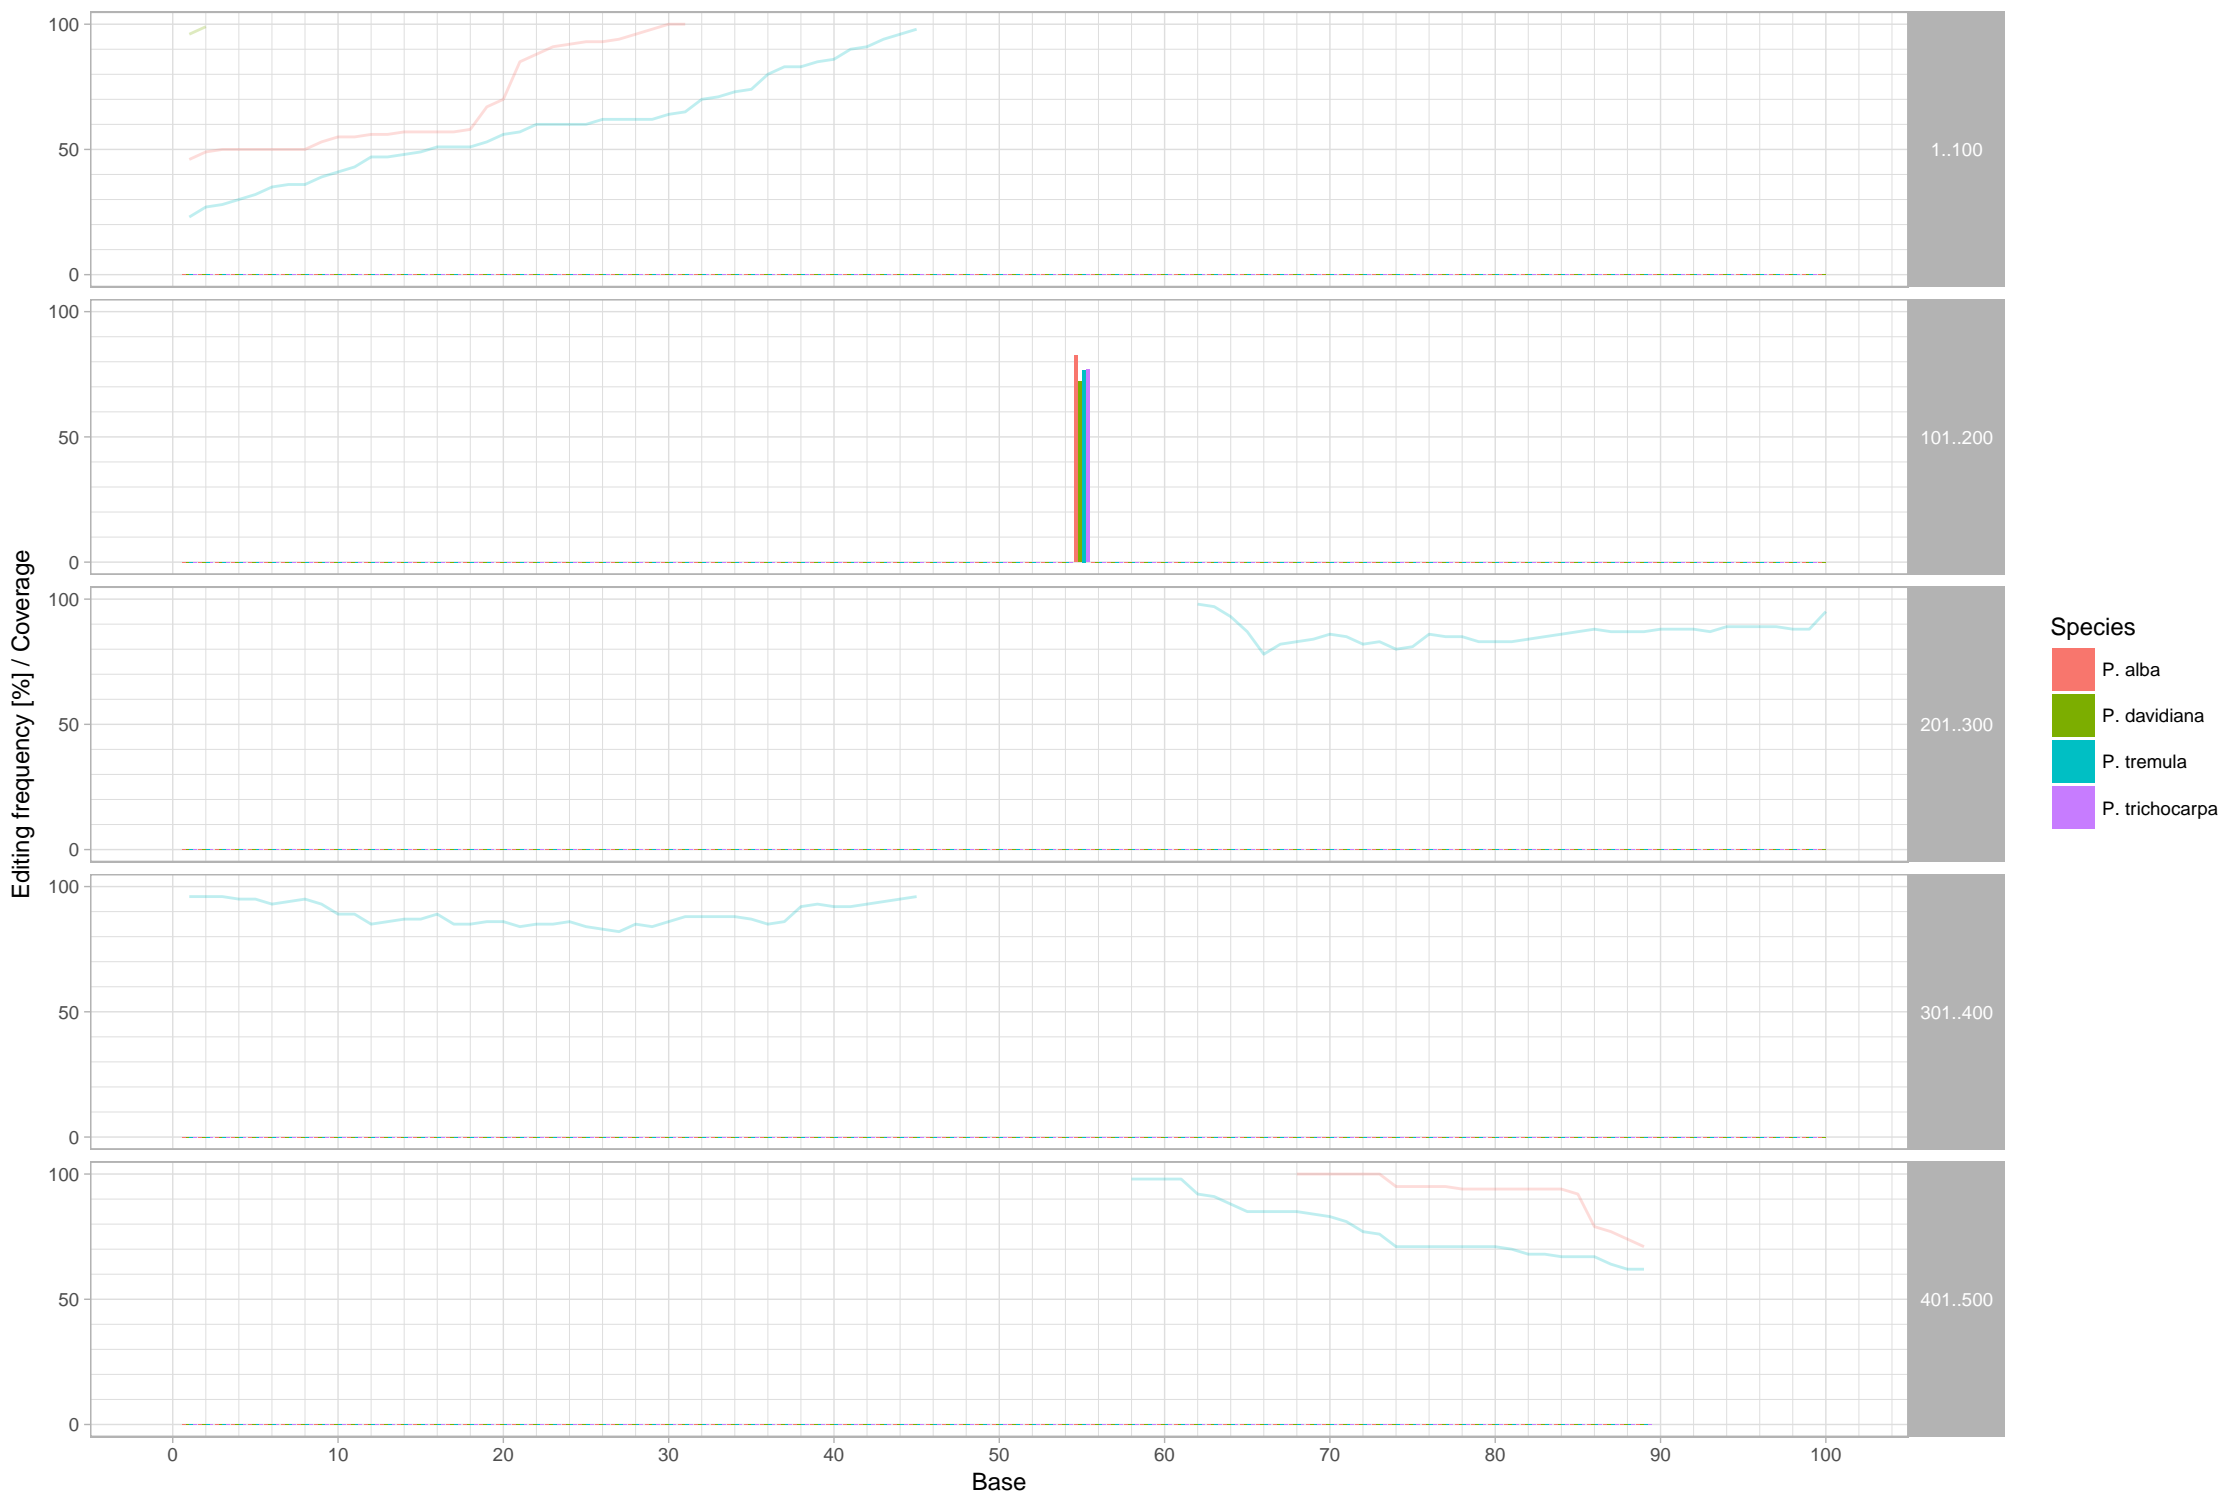

# RNA editing sites in rpl16

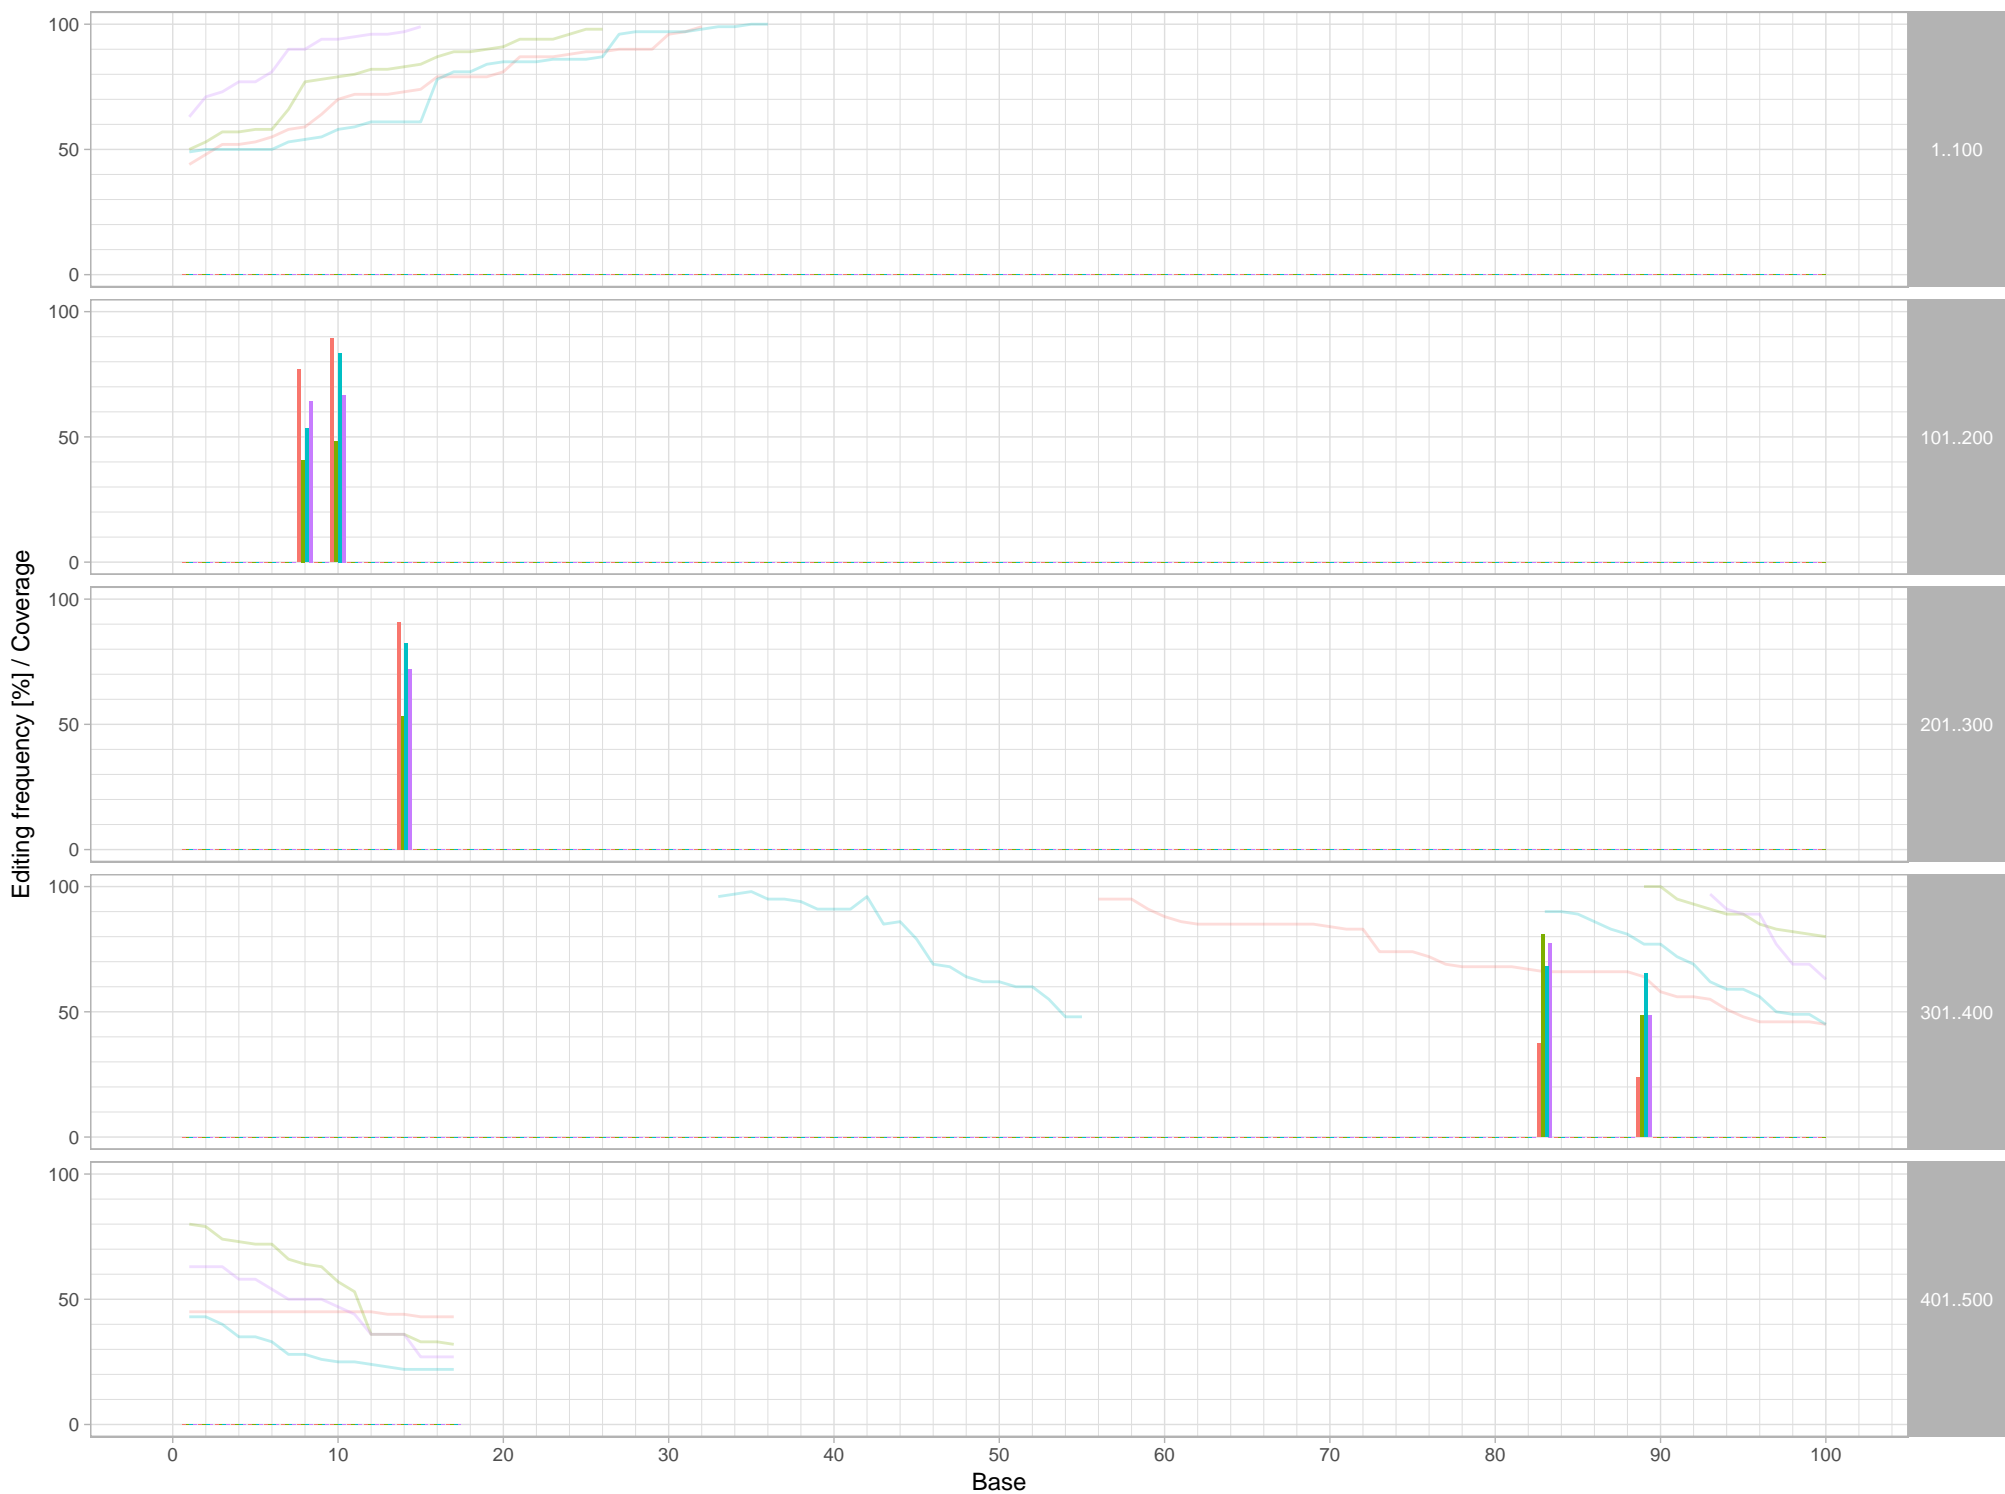

# RNA editing sites in rpl2 ALH07311.1

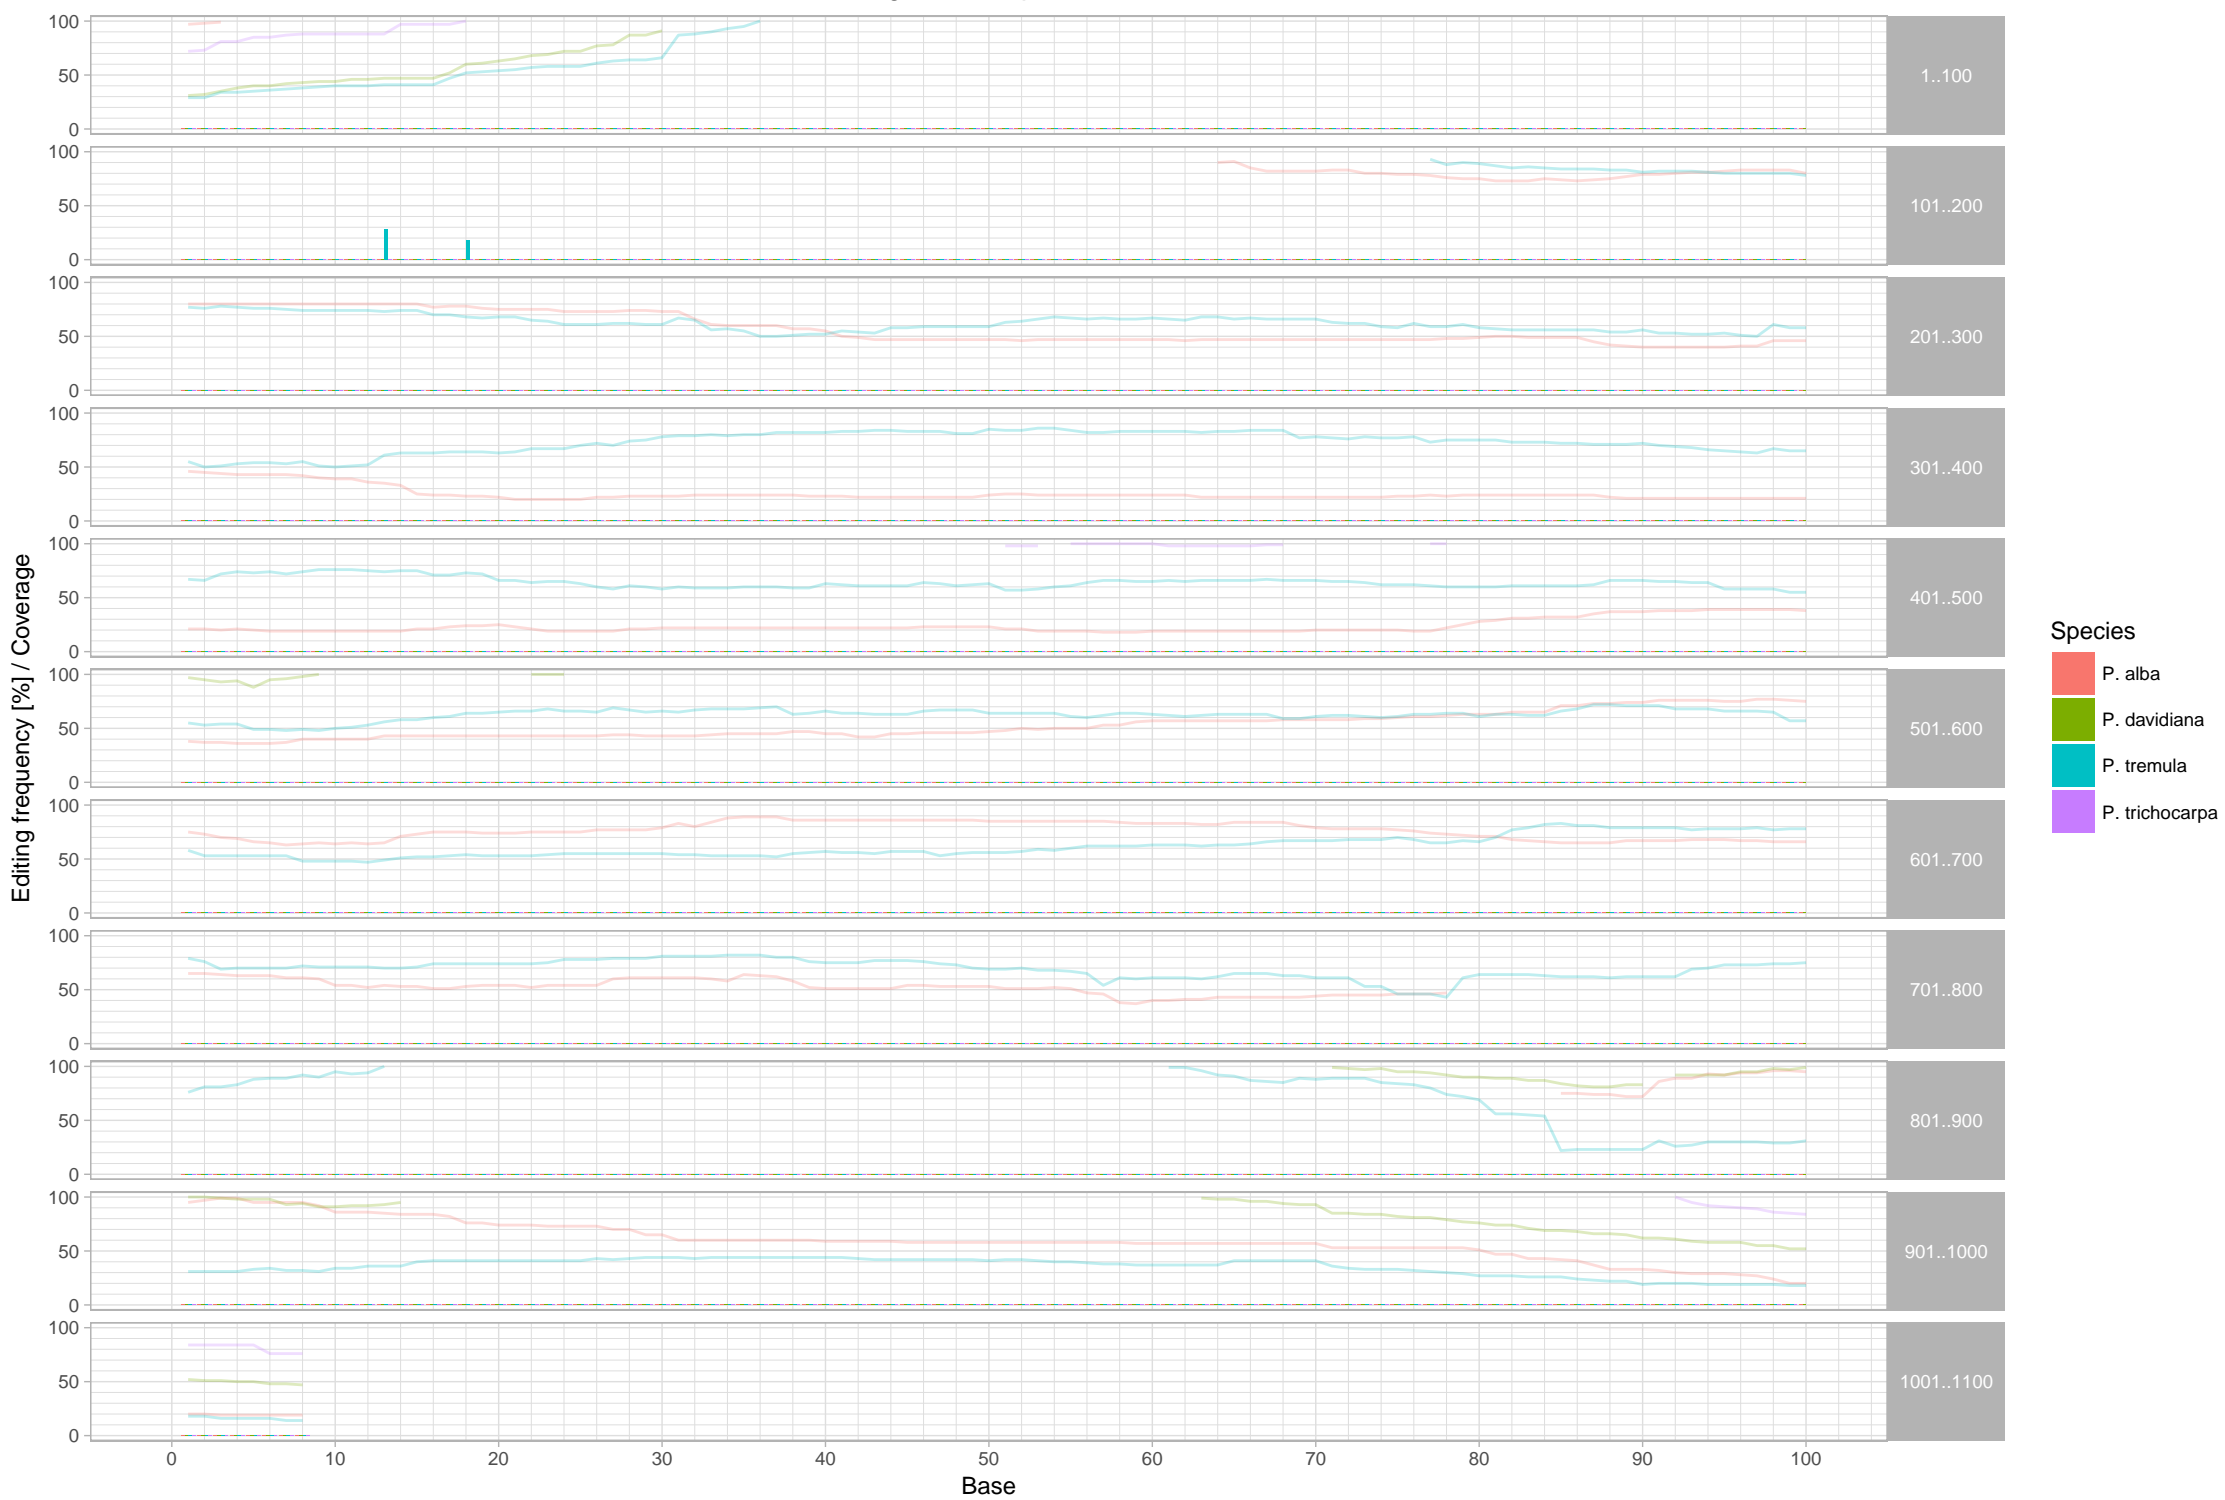



# RNA editing sites in rps1 ALH07313.1

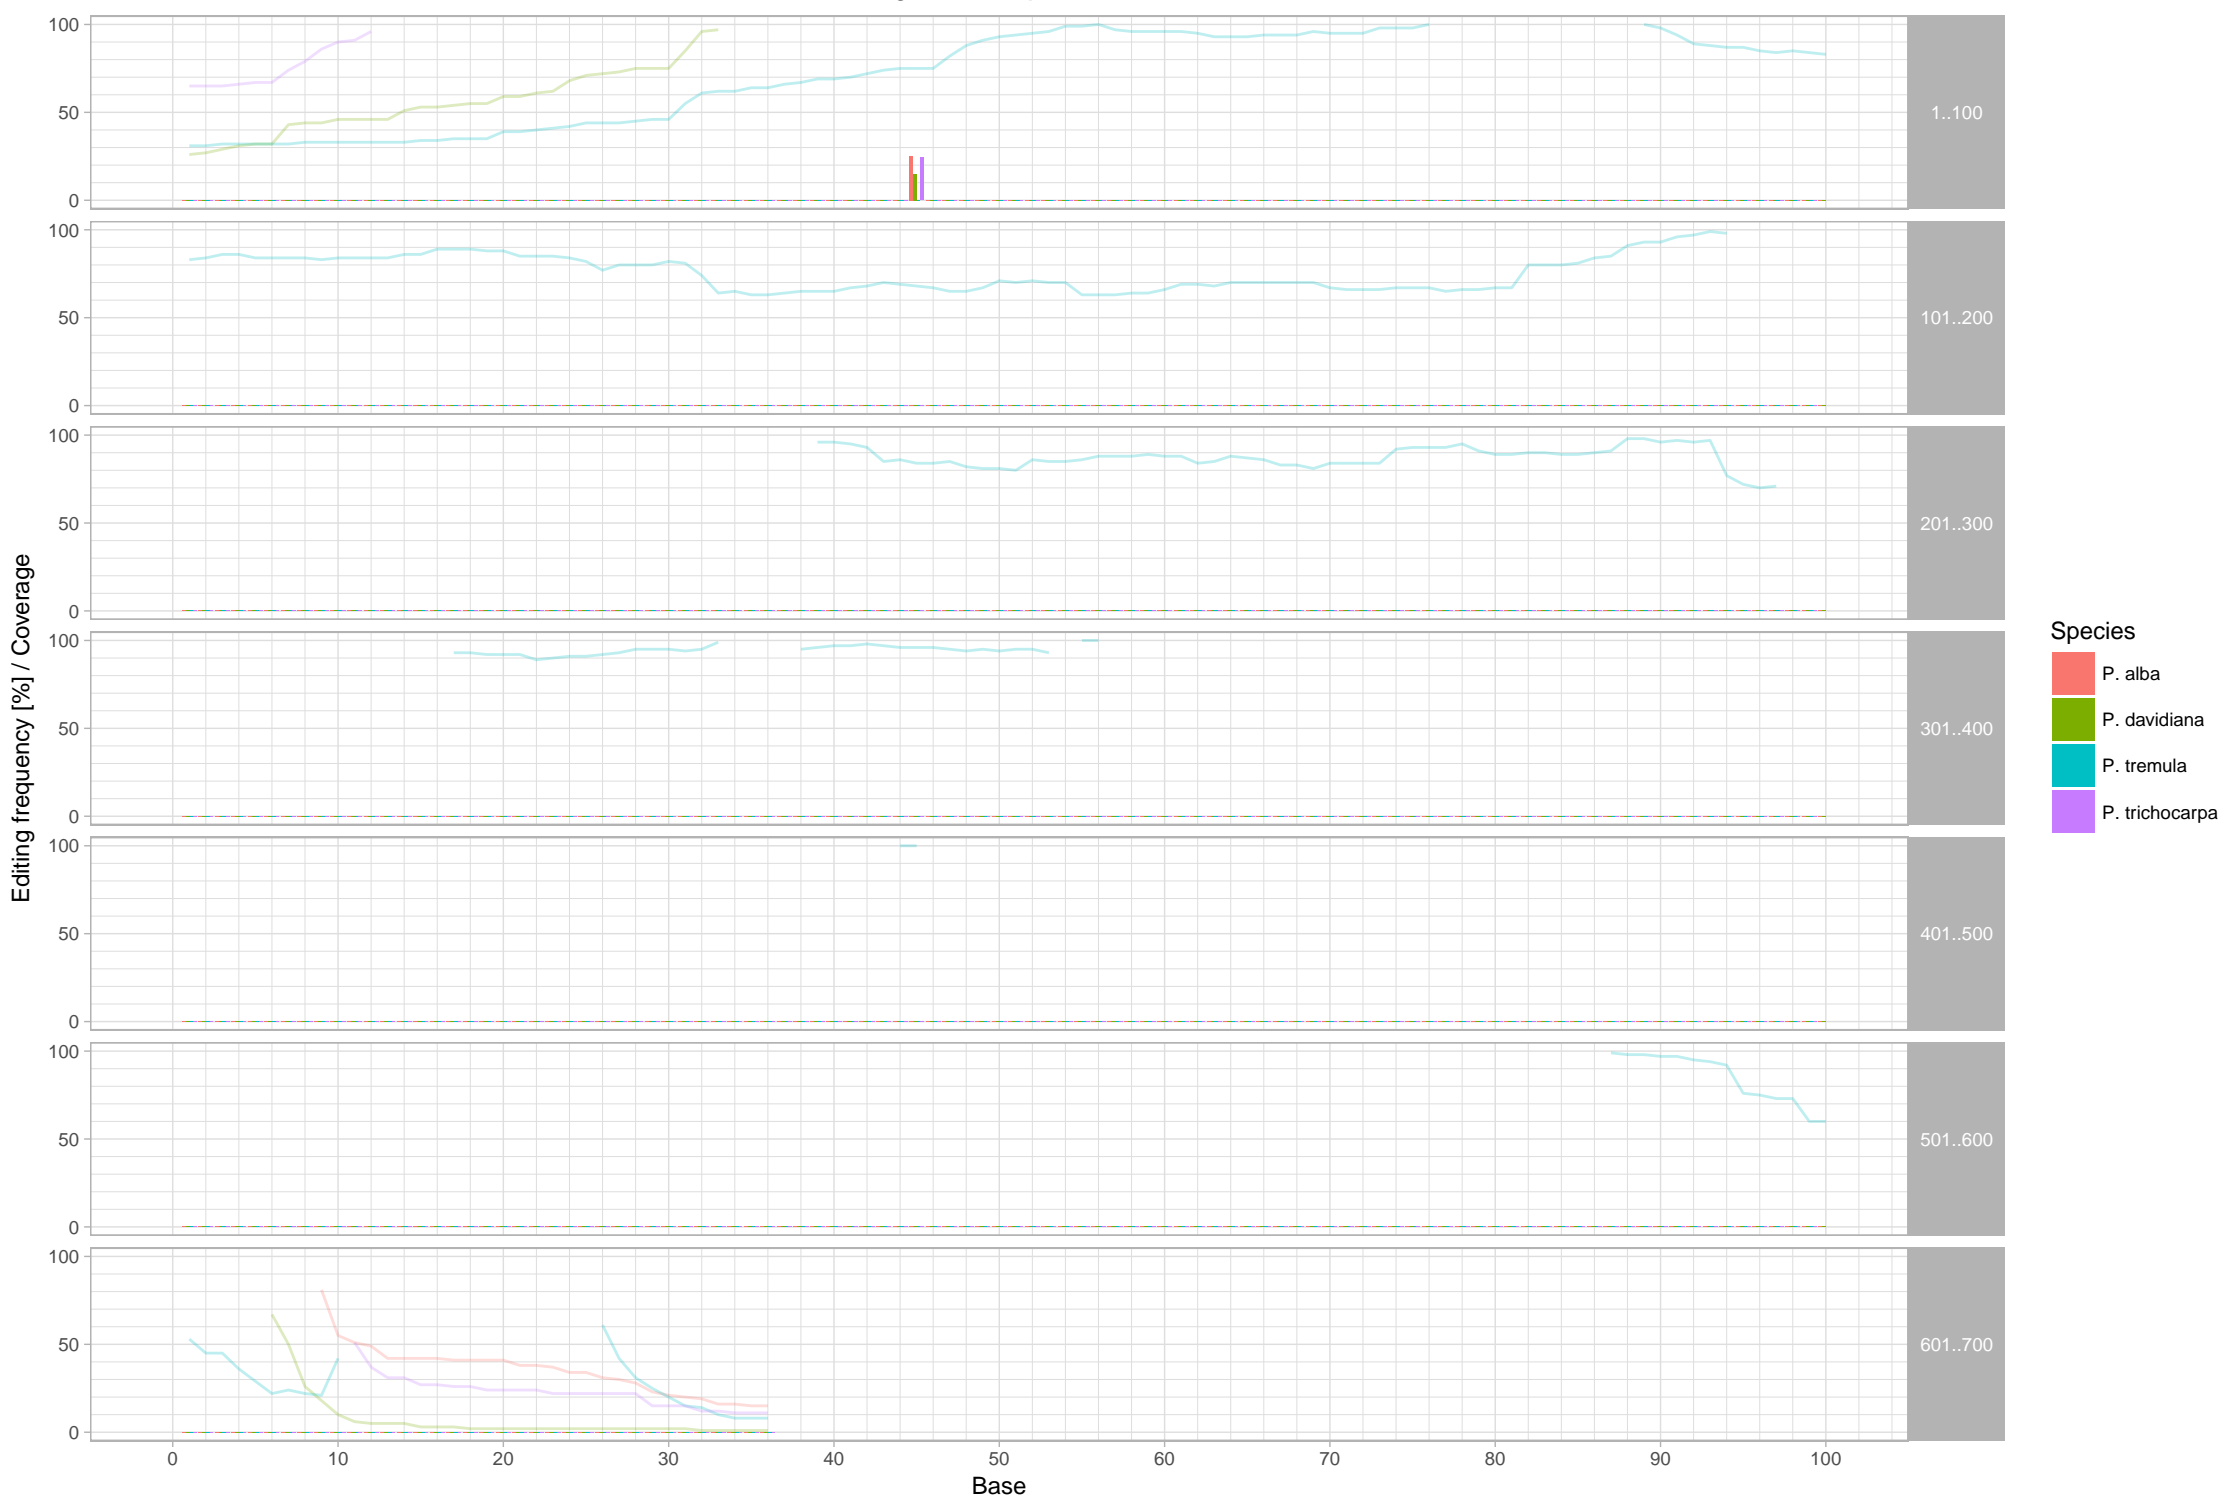

# RNA editing sites in rps12 ALH07317.1

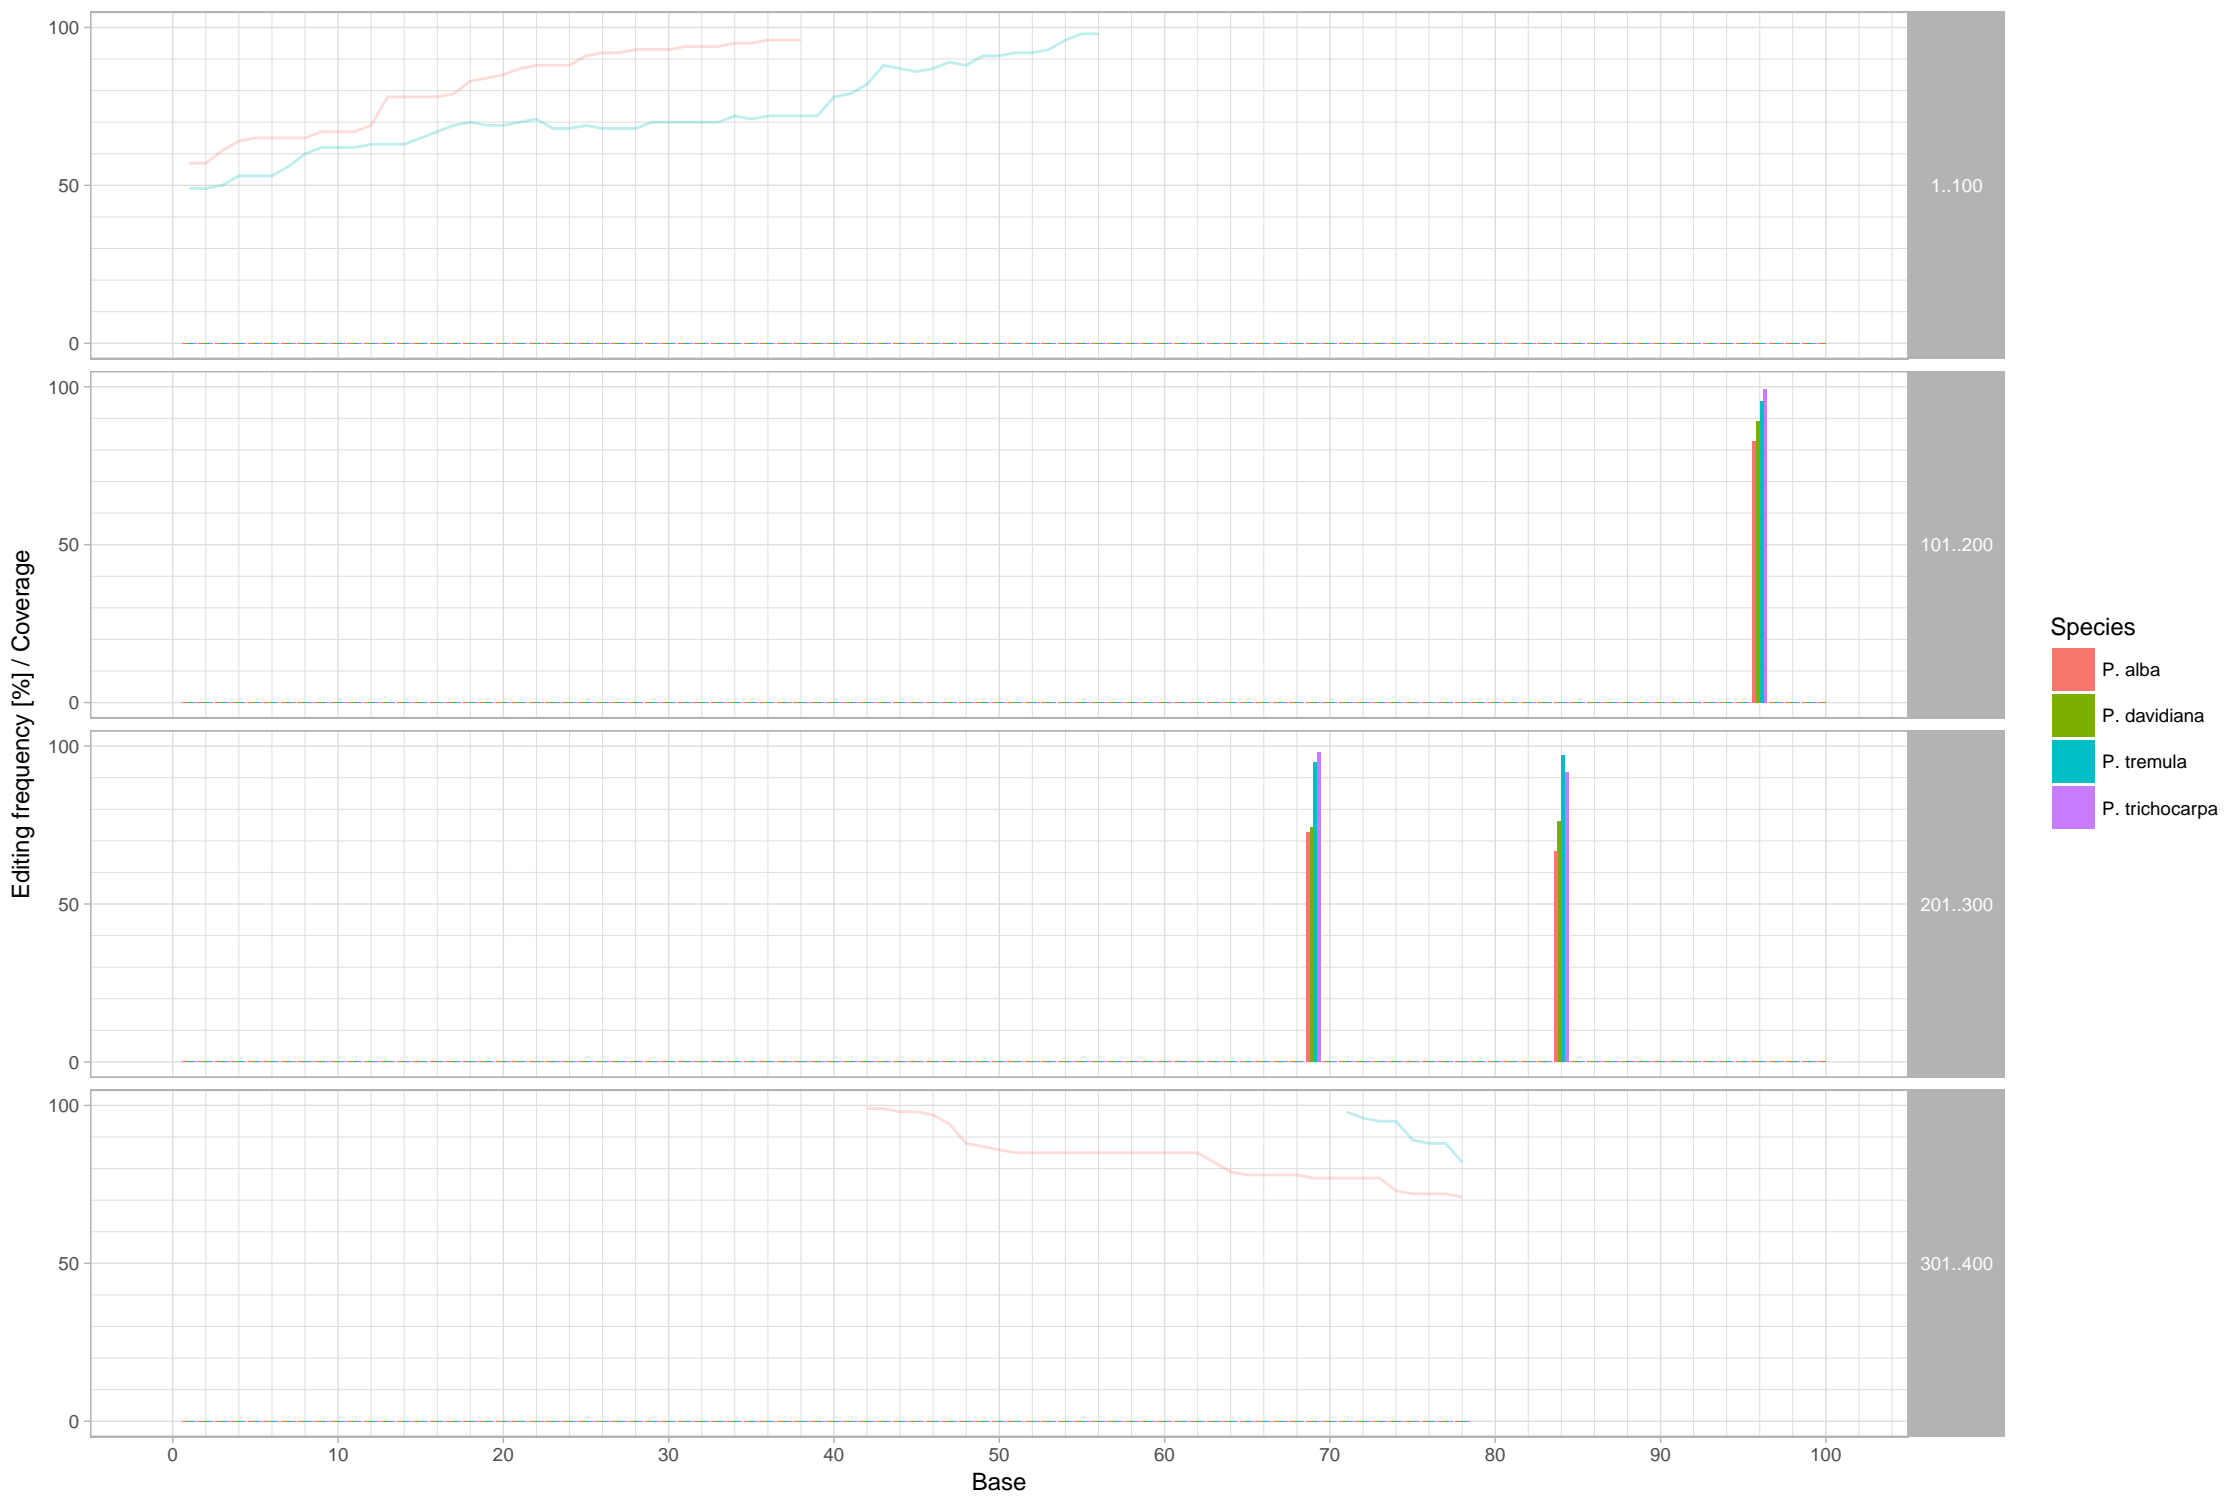

# RNA editing sites in rps3 ALH07314.1

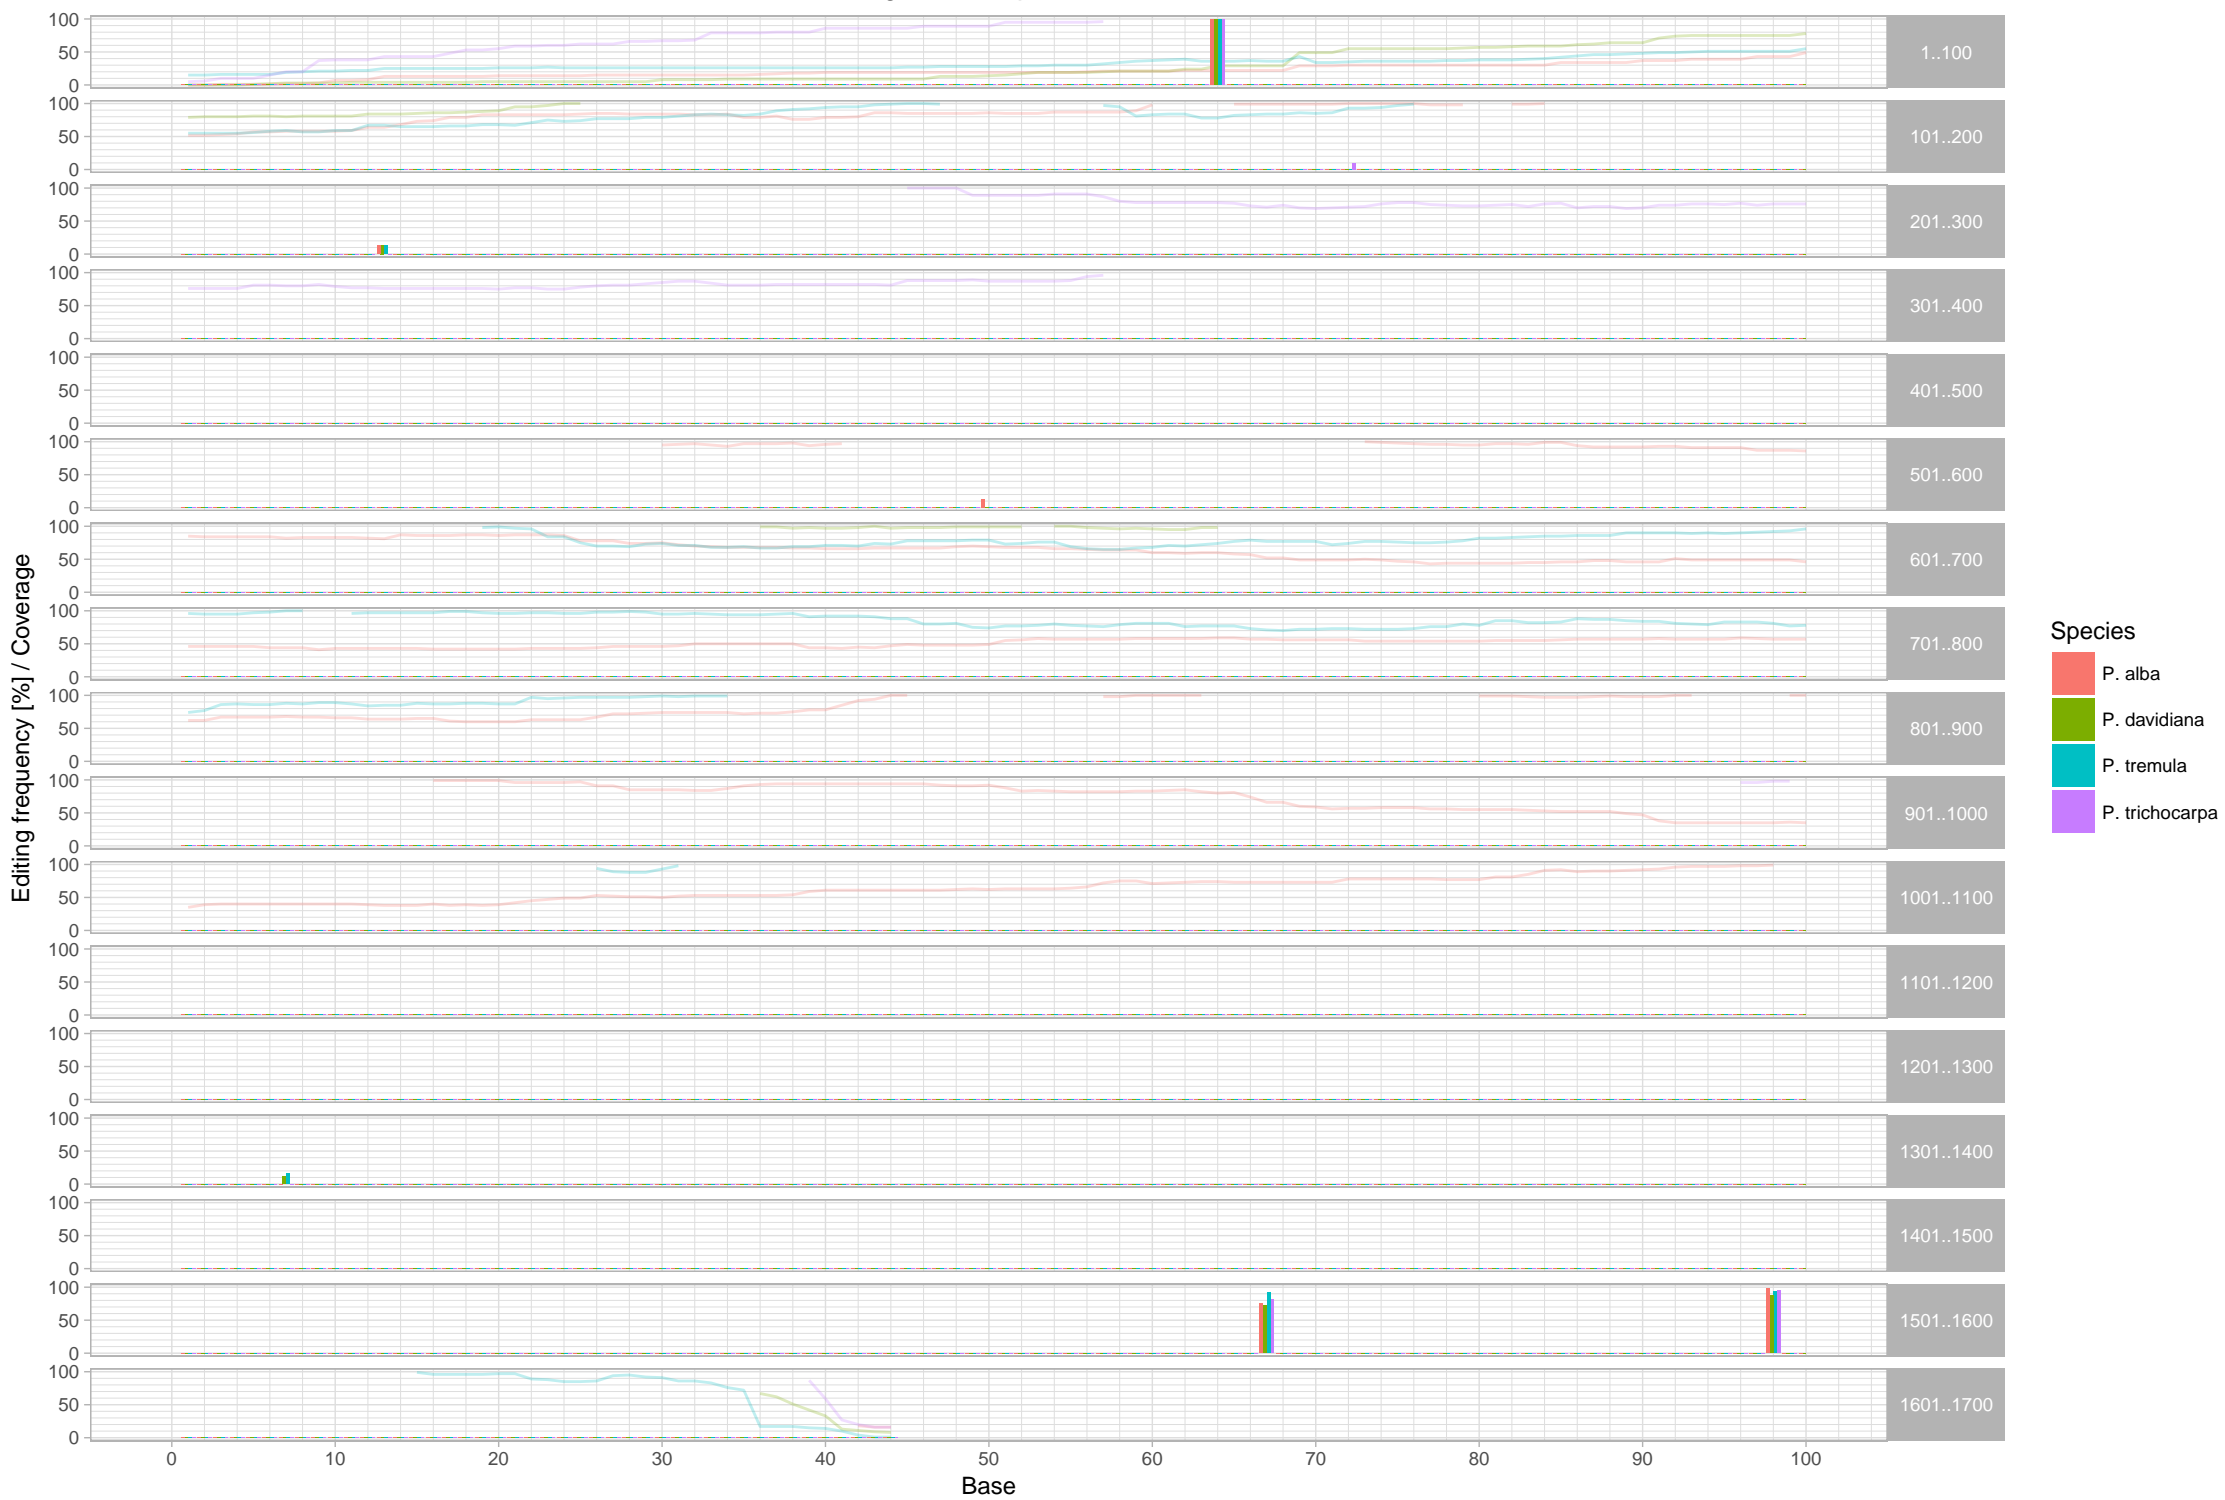

# RNA editing sites in rps4 ALH07315.1

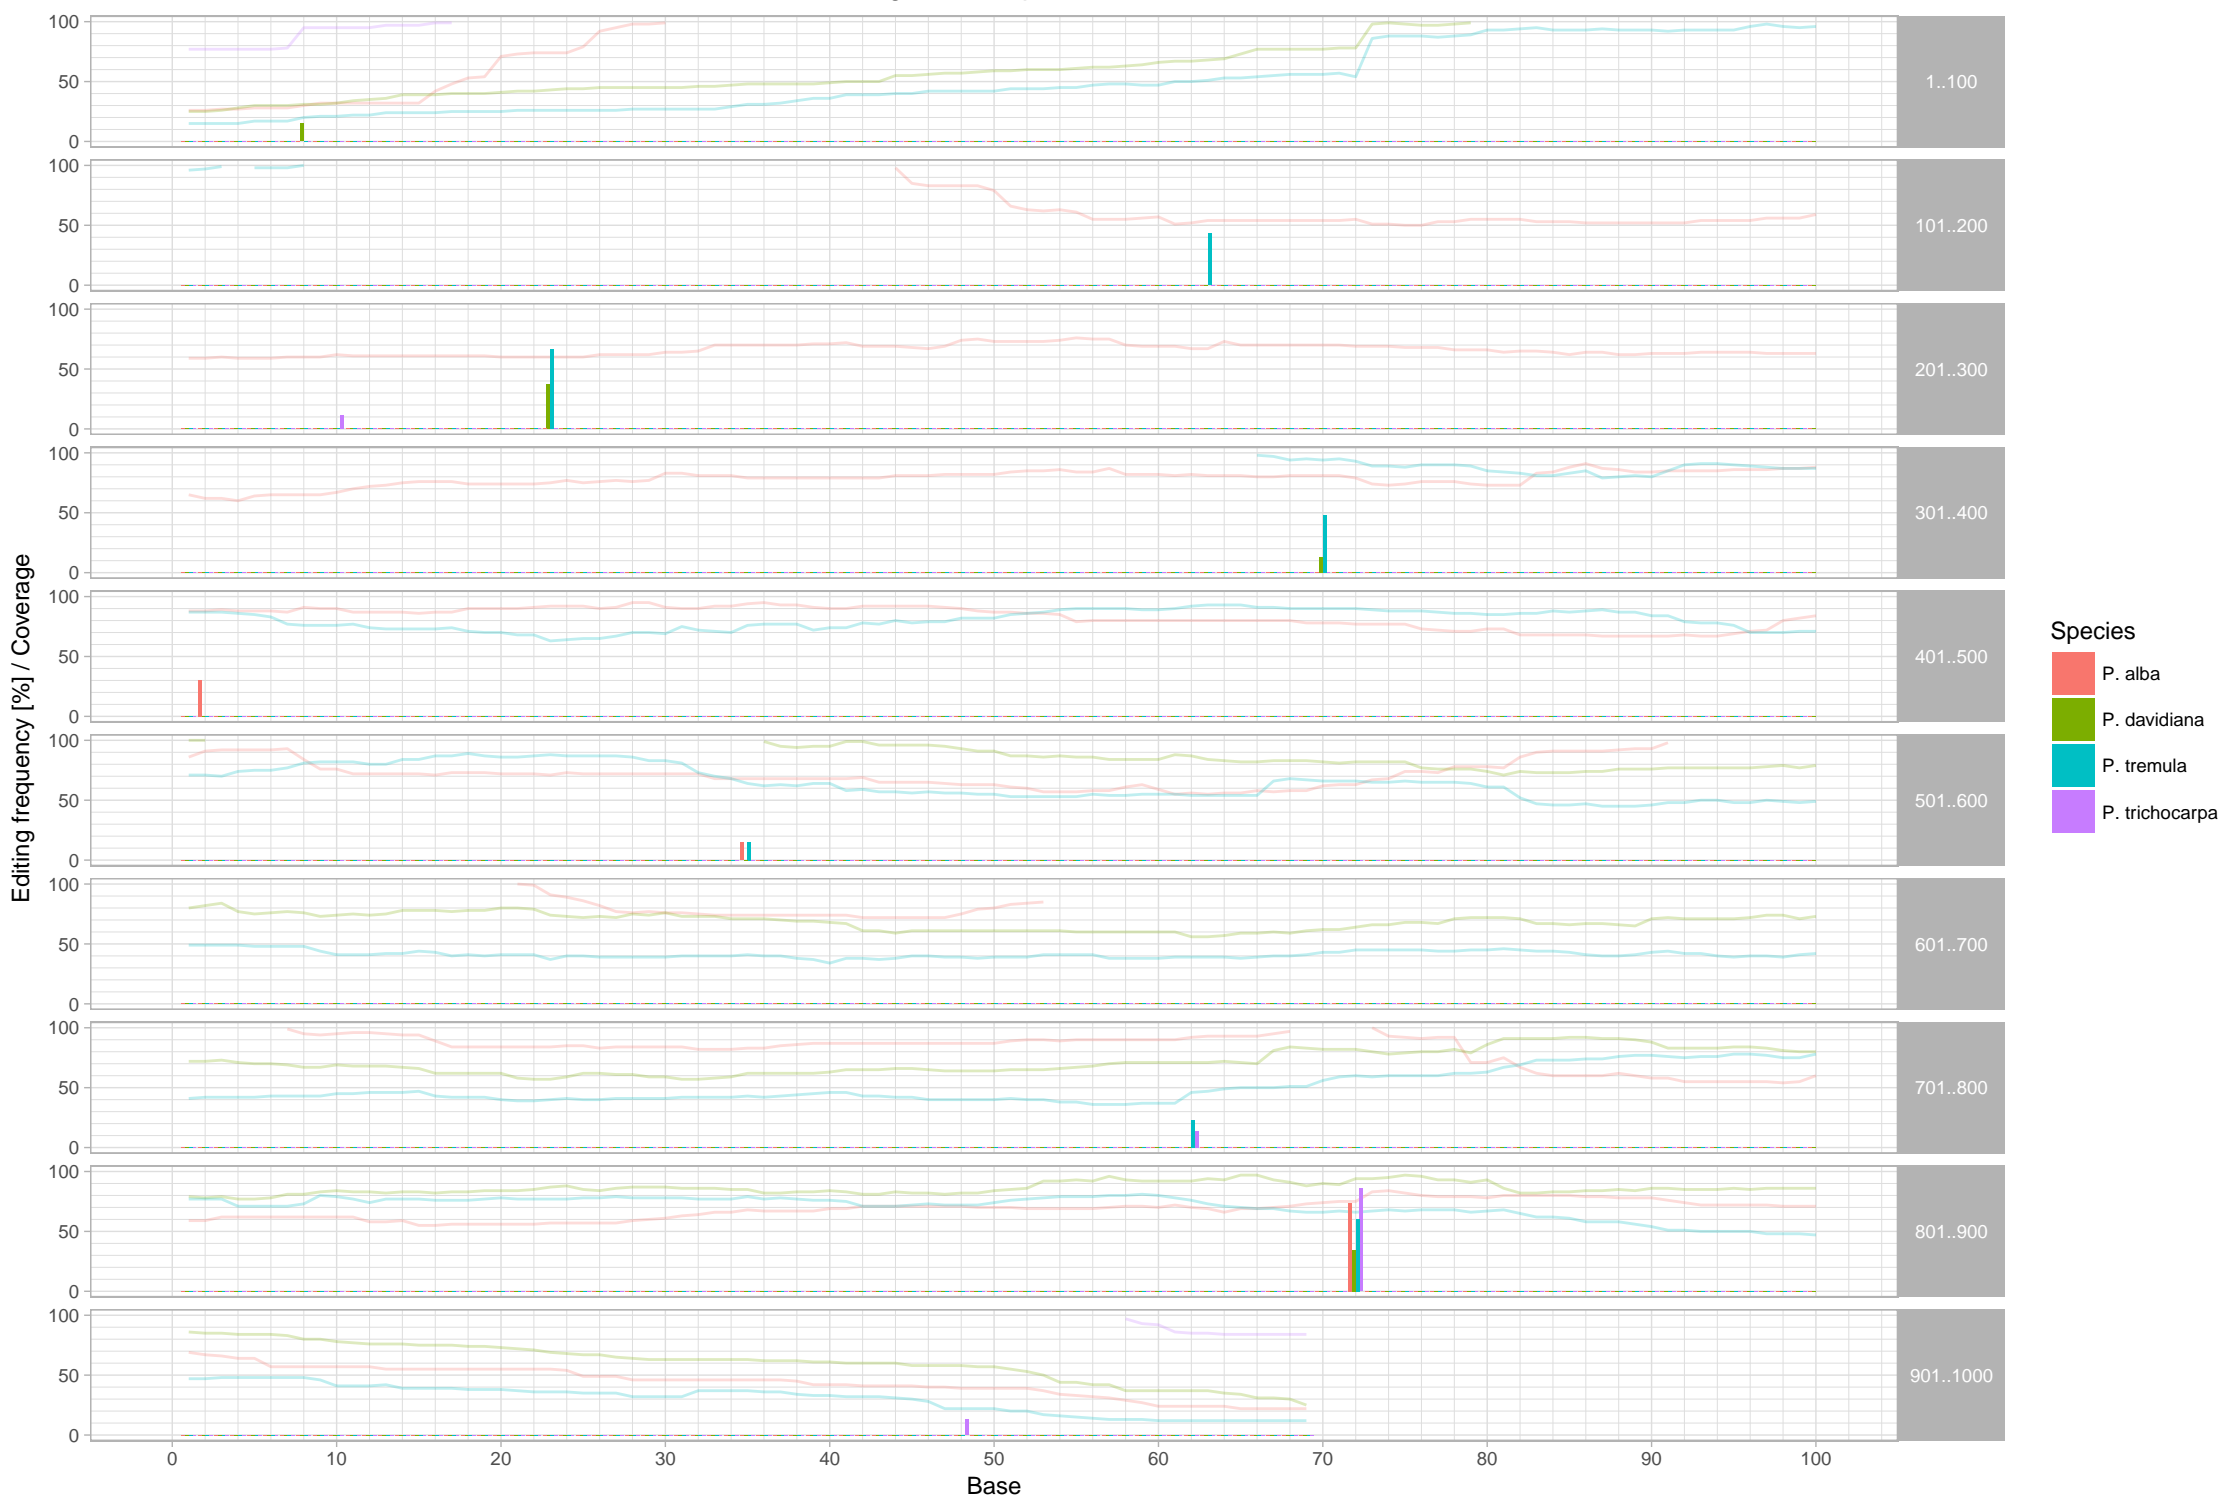

# RNA editing sites in sdh4 ALH07319.1

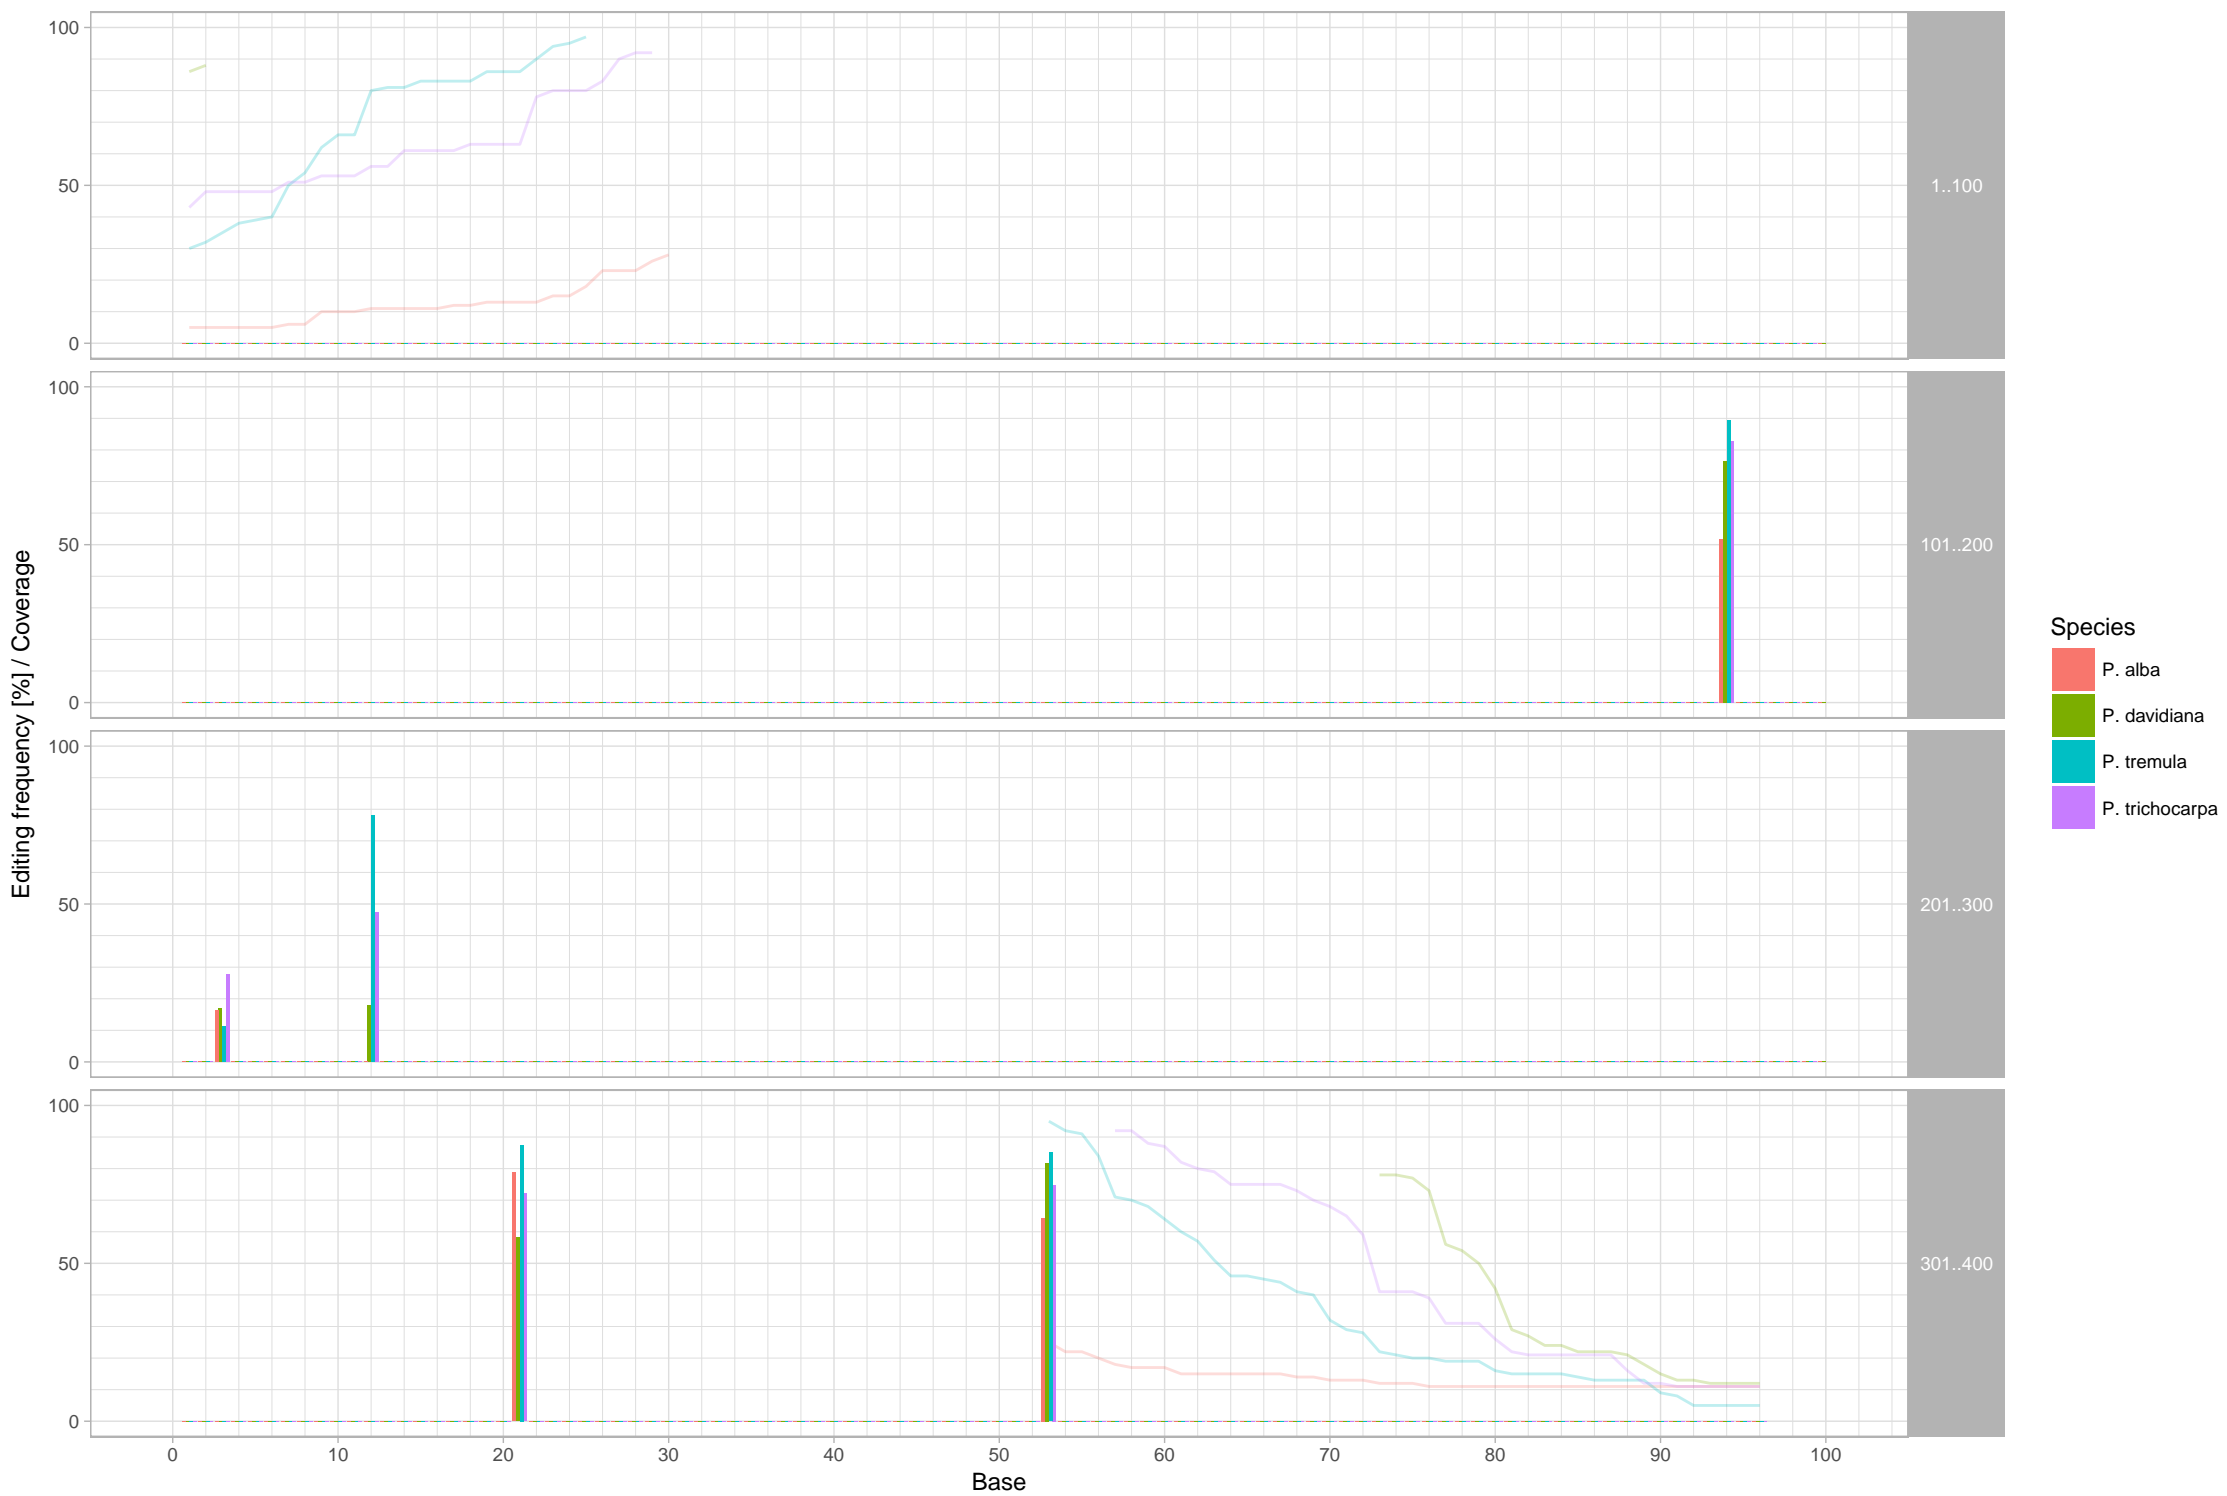

Supplement: Supplementary file 1 [file 1]
