# Supplementary material
Source: publisher figshare collection journal article supplement (https://gsajournals.figshare.com/articles/dataset/_/7166141)

# Mitochondrial RNA editing sites in *P. davidiana*

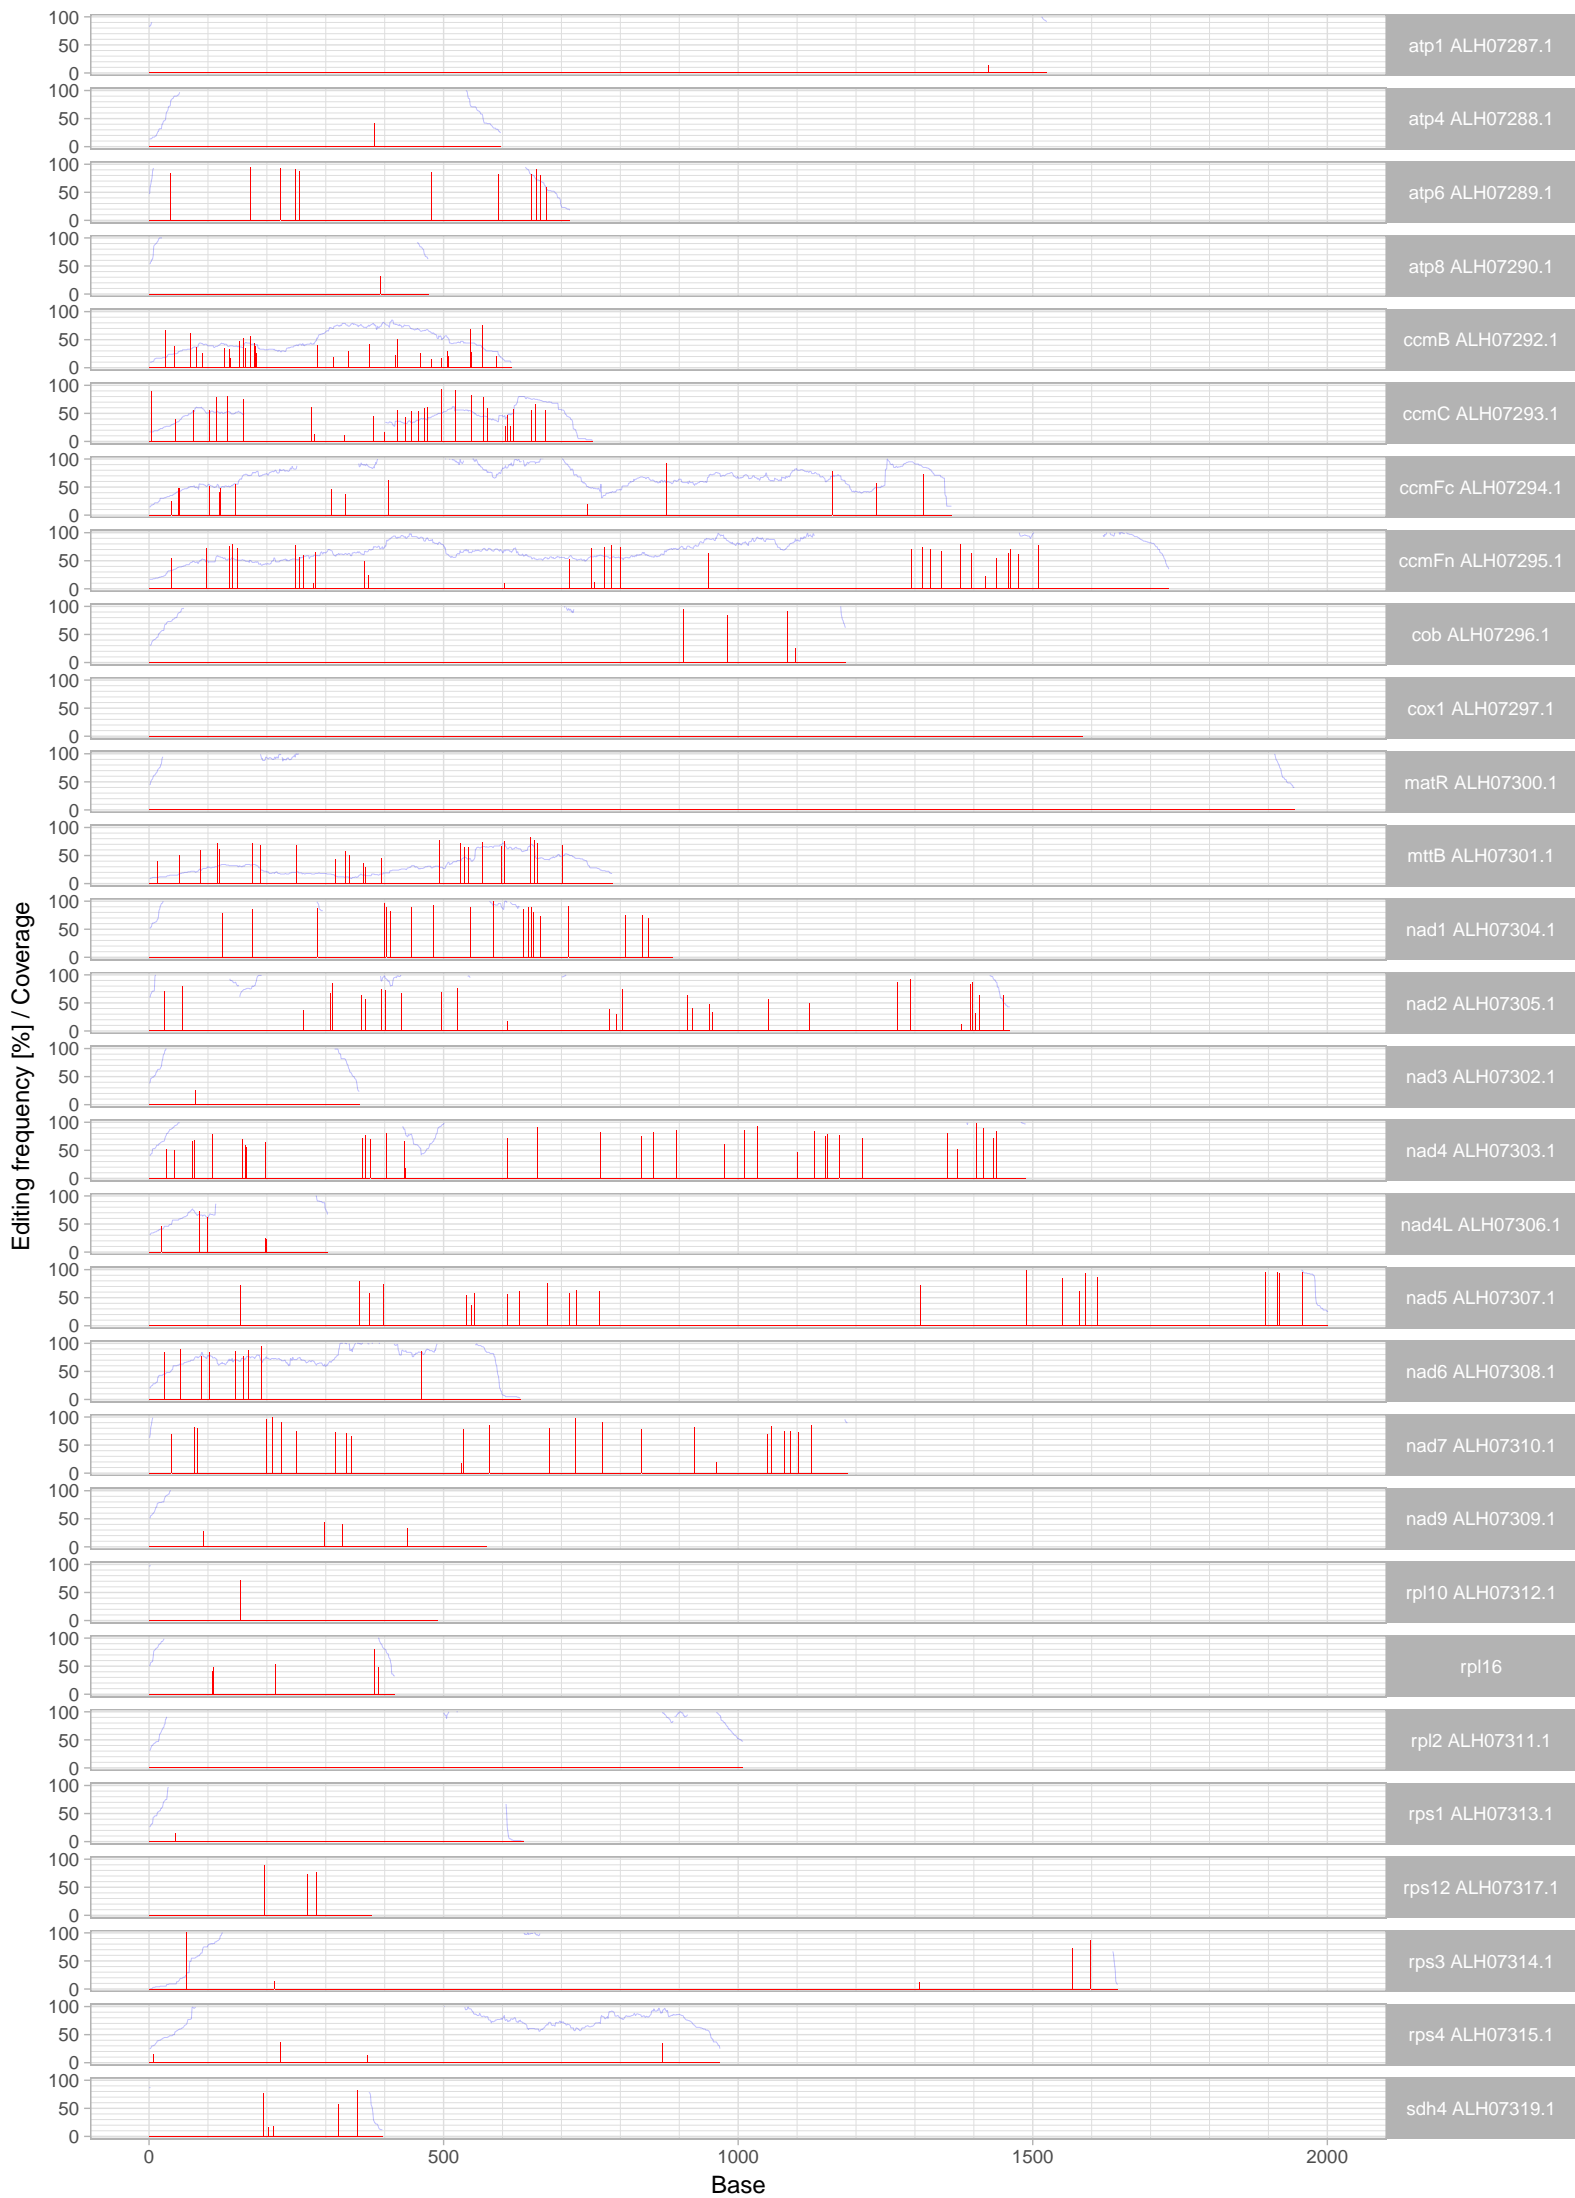

# Mitochondrial RNA editing sites in *P. alba*

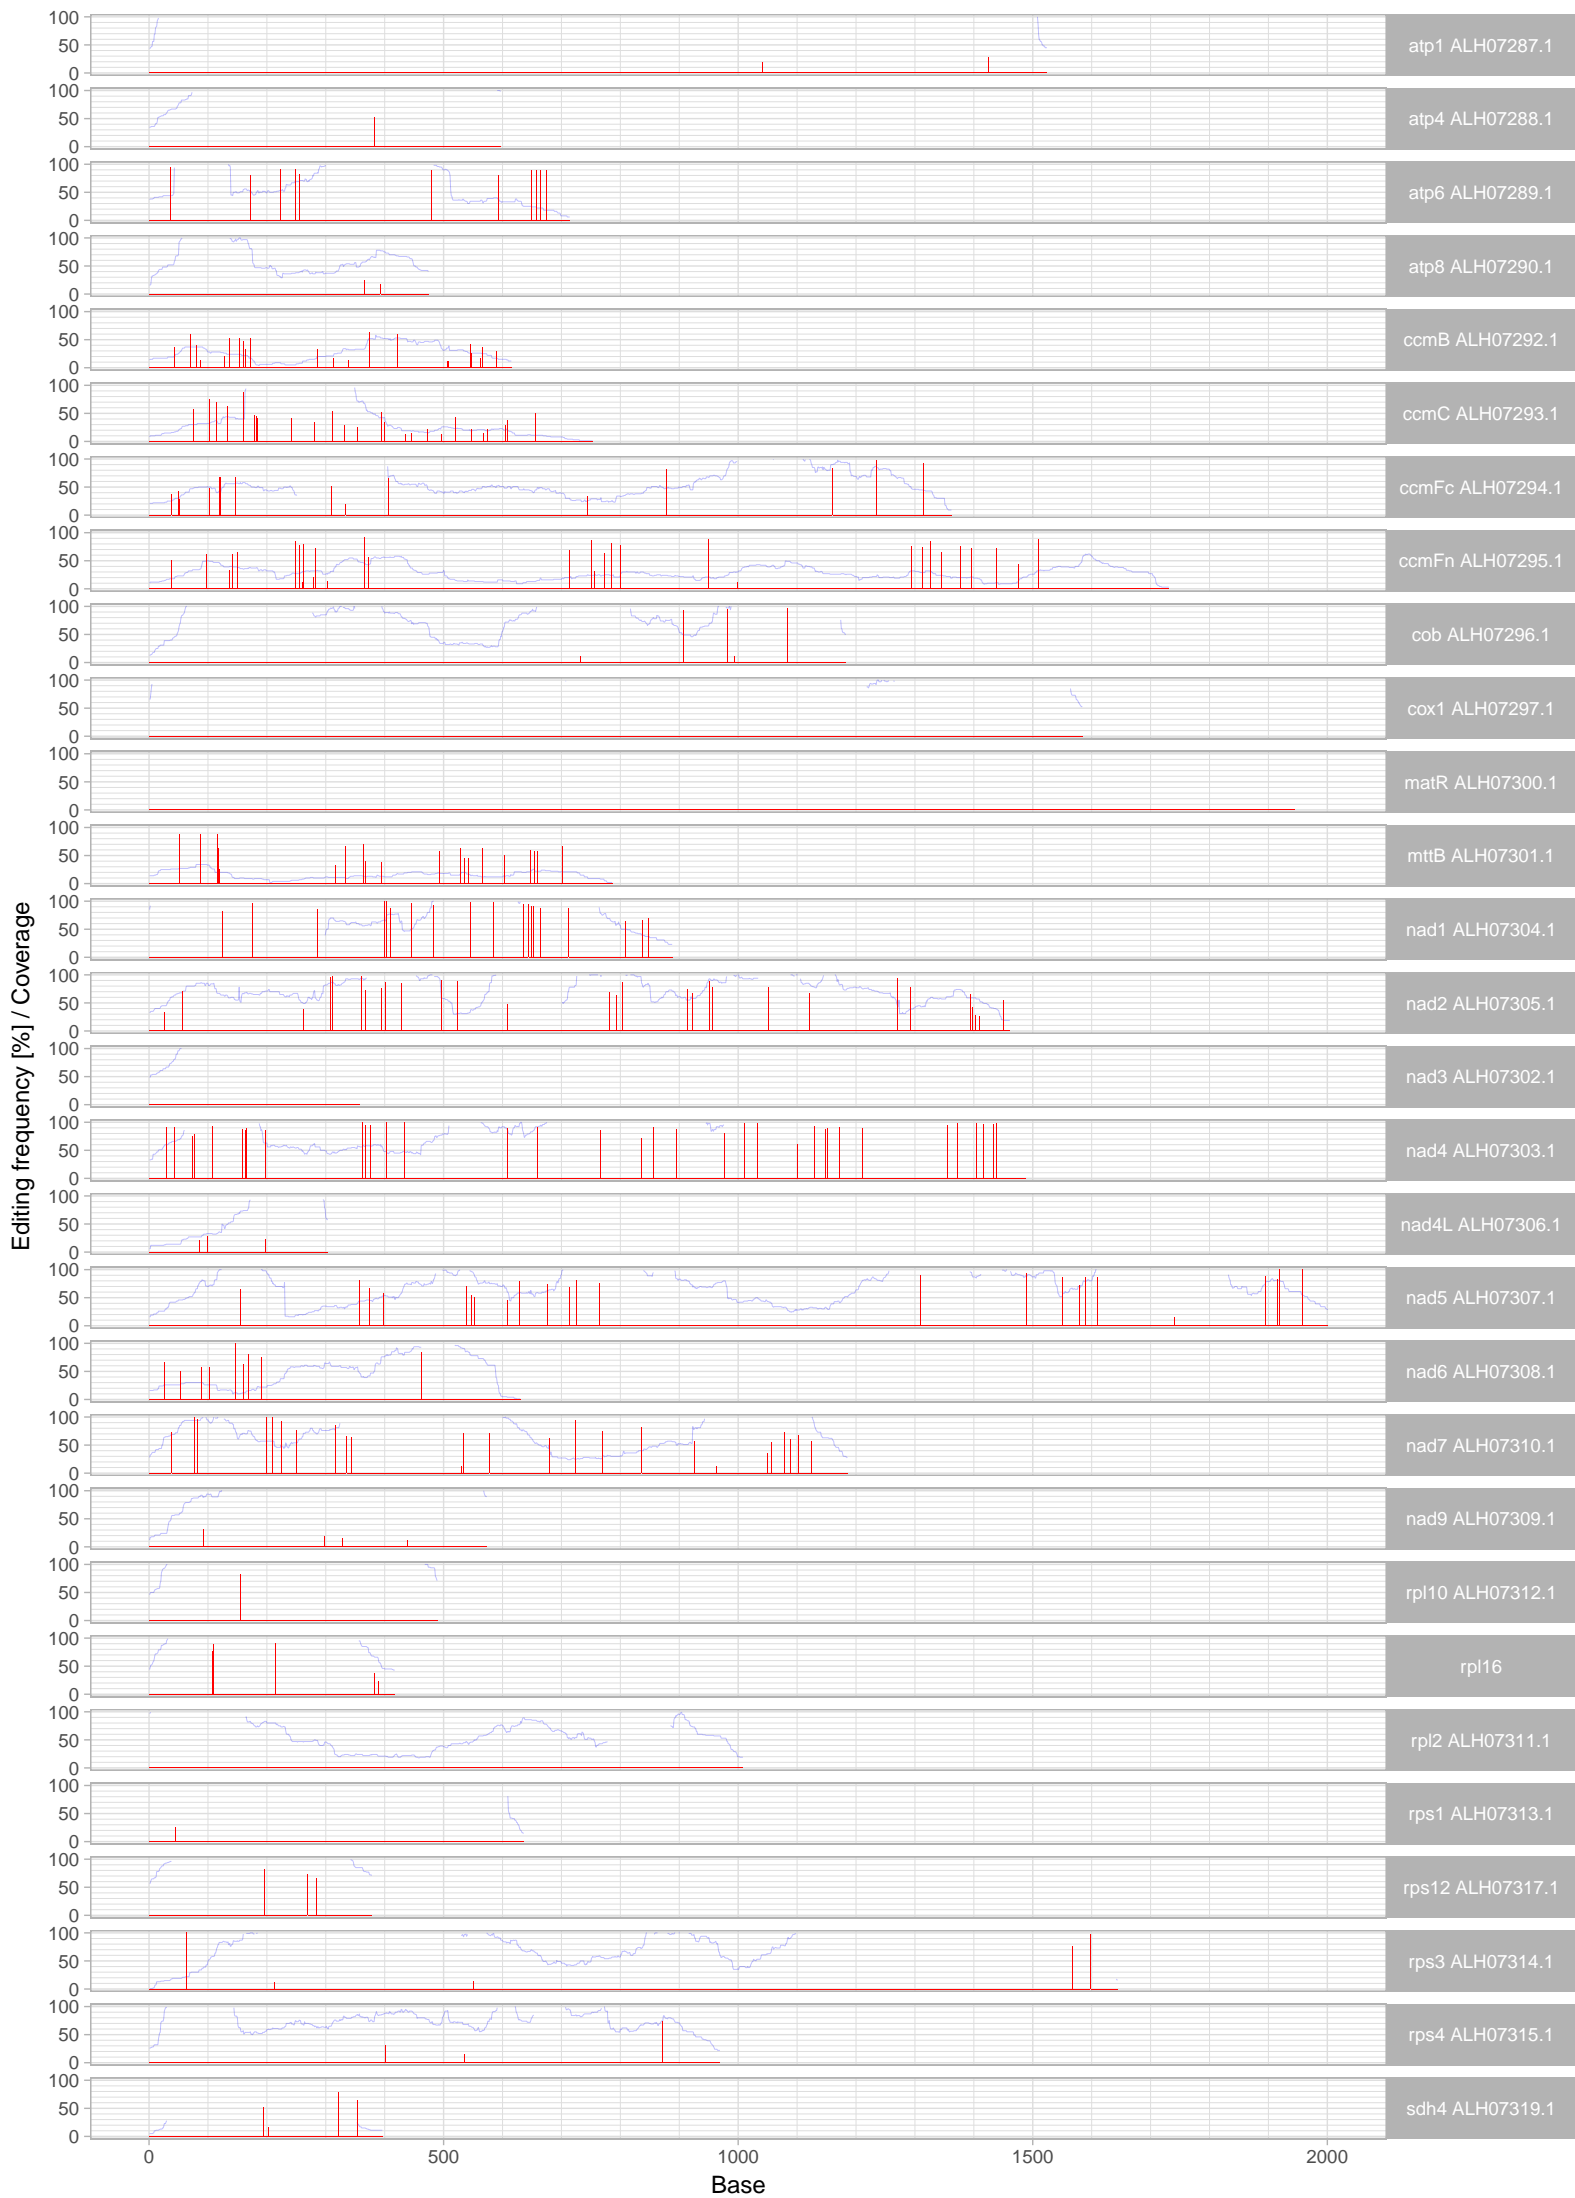

# Mitochondrial RNA editing sites in *P. trichocarpa*

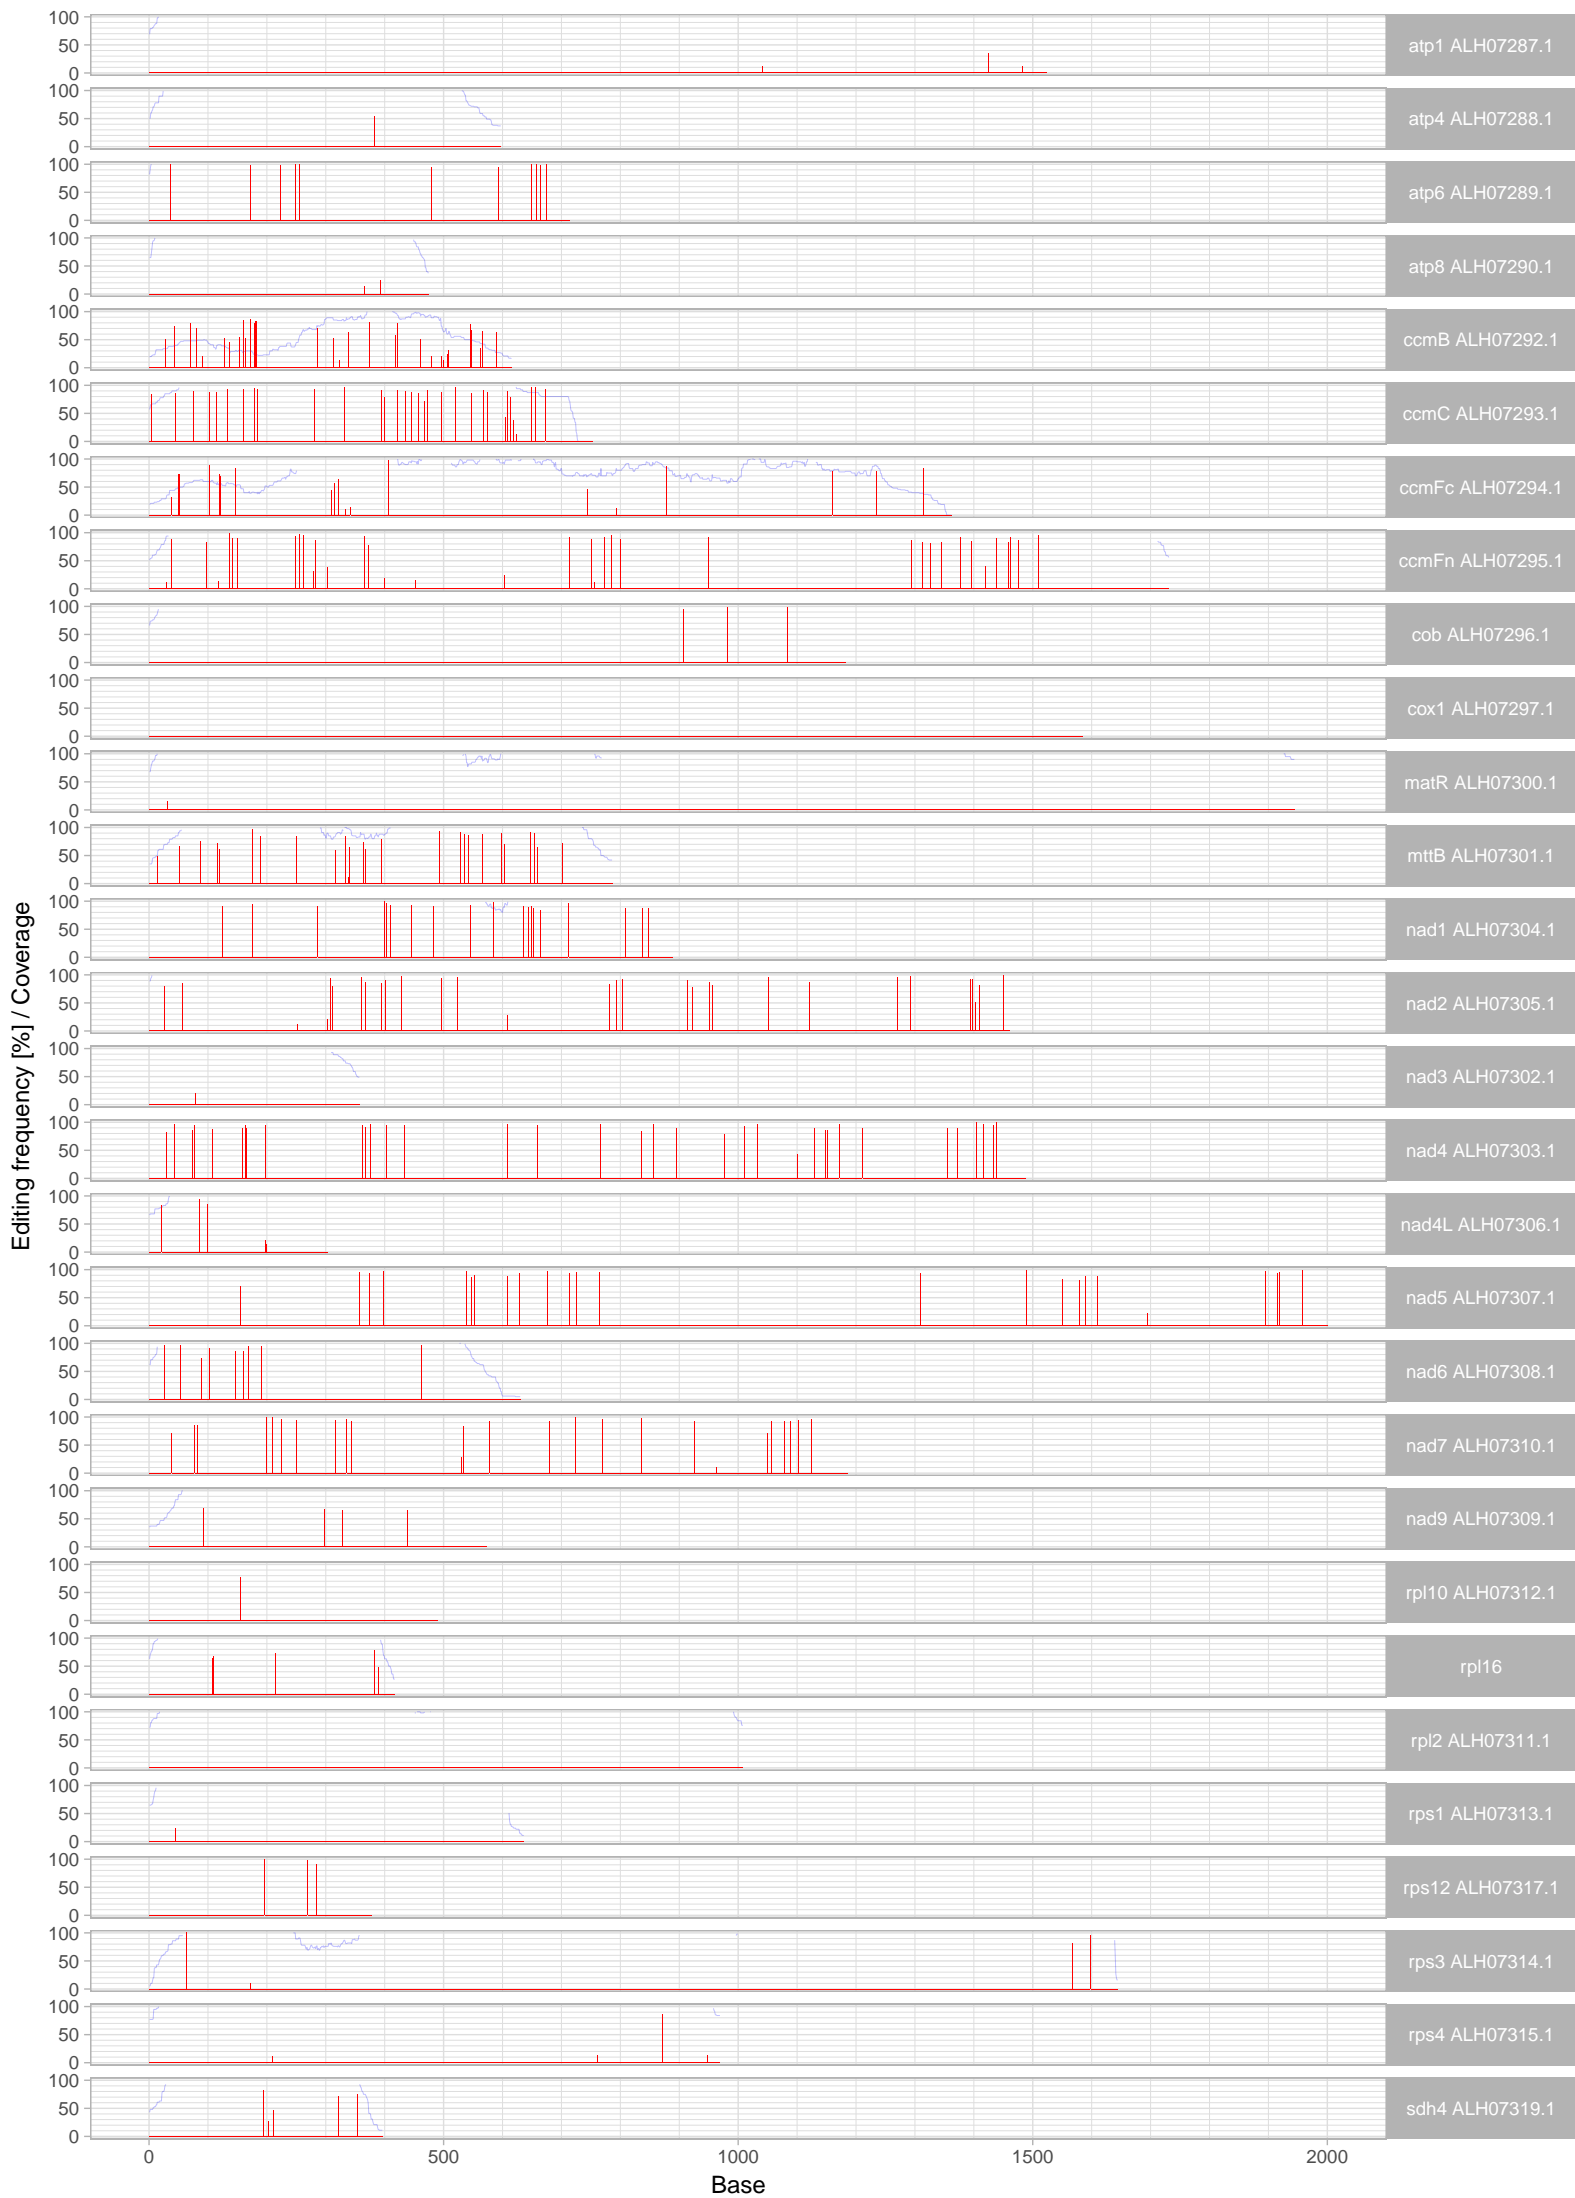

Supplement: Supplementary file 4 [file 1]
